# Supplementary material for: Spatiotemporal single-cell analysis reveals critical roles of mechano-sensing genes at the border zone in remodeling after myocardial infarction
Source: Research Square preprint supplement (doi:10.21203/rs.3.rs-620498/v1), 2021-06-22
Supplement: Supplementary file 2 [file 51185489b90aac4c2ec01702.xlsx]

## Sheet: Legends
Table S1. The sequencing and alignment metrics produced by Space Ranger
Table S2. Top 100 genes of positively differentially expressed genes (DEGs) of each cluster ranked by avg_log2FC in single-cardiomyocyte RNA-seq. DEGs were difined as p_val_adj < 0.05 and avg_log2FC > 0.25. p_val_adj , P-value adjusted for multiple testing based on Bonferroni correction; avg log2FC, average log2 fold change between cluster of interest and all other clusters; Pct. 1, percentage of…
Table S3. Top 100 genes or all genes (if less than 100) of positively differentially expressed genes (DEGs) of each cluster ranked by avg_log2FC in spatial transcriptomics. DEGs were difined as p_val_adj < 0.05 and avg_log2FC > 0.25. p_val_adj , P-value adjusted for multiple testing based on Bonferroni correction; avg log2FC, average log2 fold change between cluster of interest and all other clus…
Table S4. Gene lists of each gene module.
Table S5. Table of the module membership as the correlation of the module eignegene and the gene expression profile.
Table S6. The sequencing and alignment metrics of single-cardiomyocyte RNA-seq

## Sheet: Table S1
SlideID	Sham	day1_1	day1_2	day7_1	day7_2	day14_1	day14_2
Number of Spots Under Tissue	1689	1729	2246	3154	1938	1153	1912
Number of Reads	720303008	757547359	764905282	639076364	615756785	658297097	681268438
Mean Reads per Spot	426467	438142	340563	202624	317728	570943	356312
Mean Reads Under Tissue per Spot	346522	385756	297475	180422	279712	443388	295730
Fraction of Spots Under Tissue	0.338341	0.346354	0.44992	0.631811	0.388221	0.23097	0.383013
Median Genes per Spot	3134	1662	4739.5	6199.5	1159	5044	3247.5
Median UMI Counts per Spot	22993	6604	44167	57156.5	3159	34151	17324
Valid Barcodes	0.967975	0.97041	0.971397	0.972758	0.967167	0.965289	0.965459
Valid UMIs	0.998354	0.999041	0.999351	0.999591	0.998639	0.9968	0.997607
Sequencing Saturation	0.914696	0.976693	0.845649	0.63996	0.982416	0.890487	0.923762
Q30 Bases in Barcode	0.965835	0.963064	0.951381	0.949577	0.962528	0.961903	0.963244
Q30 Bases in RNA Read	0.93158	0.926509	0.9279	0.921338	0.9235	0.922349	0.925228
Q30 Bases in UMI	0.965073	0.962614	0.95143	0.948932	0.962806	0.961145	0.962503
Reads Mapped to Genome	0.958529	0.93726	0.962679	0.959002	0.936039	0.882986	0.93719
Reads Mapped Confidently to Genome	0.917005	0.880239	0.923101	0.921701	0.891323	0.841086	0.893592
Reads Mapped Confidently to Intergenic Regions	0.0323339	0.0265321	0.0370329	0.0213363	0.0177785	0.0232186	0.0258854
Reads Mapped Confidently to Intronic Regions	0.00480952	0.00426401	0.00760609	0.00670712	0.00488596	0.00554244	0.00704816
Reads Mapped Confidently to Exonic Regions	0.879862	0.849443	0.878462	0.893657	0.868659	0.812324	0.860659
Reads Mapped Confidently to Transcriptome	0.859542	0.830809	0.858461	0.875474	0.849956	0.794201	0.838849
Reads Mapped Antisense to Gene	0.00946808	0.00691292	0.00941657	0.00702185	0.00672147	0.00737237	0.0118001
Fraction Reads in Spots Under Tissue	0.83983	0.909723	0.903705	0.916377	0.912109	0.810976	0.863485
Total Genes Detected	16864	15849	19192	20965	16037	17646	17588

## Sheet: Table S2
Cluster 0 marker genes top 100						Cluster 1 marker genes top 100						Cluster 2 marker genes top 100						Cluster 3 marker genes top 100						Cluster 4 marker genes top 100						Cluster 5 marker genes top 100						Cluster 6 marker genes top 100						Cluster 7 marker genes top 100
gene_name	p_val	avg_log2FC	pct.1	pct.2	p_val_adj	gene_name	p_val	avg_log2FC	pct.1	pct.2	p_val_adj	gene_name	p_val	avg_log2FC	pct.1	pct.2	p_val_adj	gene_name	p_val	avg_log2FC	pct.1	pct.2	p_val_adj	gene_name	p_val	avg_log2FC	pct.1	pct.2	p_val_adj	gene_name	p_val	avg_log2FC	pct.1	pct.2	p_val_adj	gene_name	p_val	avg_log2FC	pct.1	pct.2	p_val_adj	gene_name	p_val	avg_log2FC	pct.1	pct.2	p_val_adj
Cthrc1	2.705e-87	7.85642	0.685	0.033	5.91232e-83	S100a9	2.31298e-12	5.5521	0.34	0.117	5.05548e-08	Timp4	3.46912e-56	4.91012	0.865	0.261	7.58246e-52	Lars2	9.45917e-22	3.75273	1	1	2.06749e-17	2010109A12Rik	4.05271e-07	4.46711	0.338	0.147	0.008858	Pptc7	3.42907e-13	1.72395	0.986	0.78	7.49492e-09	Dppa5a	1.20103e-10	2.54679	0.119	0.009	2.62509e-06	Nmrk2	7.12029e-17	2.48024	1	0.786	1.55628e-12
Postn	1.06245e-70	6.94626	0.933	0.328	2.32219e-66	Clec7a	5.2602e-27	5.11456	0.503	0.134	1.14972e-22	Rgcc	3.27604e-65	4.64855	0.968	0.304	7.16044e-61	Slc25a34	2.86874e-26	2.65654	0.974	0.857	6.2702e-22	Tmem238l	8.38457e-07	3.98155	0.122	0.02	0.0183261	Hjv	1.00263e-19	1.65009	1	0.806	2.19145e-15	Ckmt2	1.41854e-37	2.50029	1	0.967	3.1005e-33	Hspb1	9.08878e-16	2.38088	1	0.973	1.98653e-11
Mfap2	8.6964e-85	6.72291	0.819	0.109	1.90077e-80	S100a8	1.59045e-16	4.97298	0.476	0.182	3.47625e-12	Ly6c1	1.88584e-66	4.55233	0.984	0.348	4.12187e-62	Lgals4	2.29955e-09	2.60233	0.831	0.639	5.02612e-05	Antxr1	1.46123e-06	3.88779	0.757	0.646	0.031938	Fbp2	1.04981e-09	1.63243	0.826	0.519	2.29457e-05	Uqcrc2	4.69774e-34	2.44659	1	0.903	1.02679e-29	Cryab	2.84952e-22	2.24809	1	0.997	6.2282e-18
Serpinf1	4.5818e-78	6.66961	0.872	0.18	1.00144e-73	Chil3	3.35208e-29	4.8874	0.469	0.103	7.32663e-25	Ripply3	2.68446e-19	4.53128	0.365	0.082	5.86743e-15	Usp2	4.41476e-25	2.28365	1	0.934	9.64935e-21	Slc34a2	1.948e-29	3.86112	0.986	0.985	4.25775e-25	Fndc5	2.0514e-19	1.63107	1	0.873	4.48375e-15	Ech1	6.05549e-36	2.41035	1	0.98	1.32355e-31	Fhl1	1.05133e-14	2.23018	1	0.843	2.29789e-10
Col3a1	6.06662e-78	6.55329	0.98	0.391	1.32598e-73	Il1r2	2.80124e-12	4.7992	0.354	0.132	6.12268e-08	Car4	5.21151e-51	4.51425	0.778	0.194	1.13908e-46	Tmem63b	2.90793e-16	2.04624	0.896	0.861	6.35585e-12	Cbll1	1.57269e-08	3.83333	0.108	0.489	0.000343742	Oxct1	3.69895e-25	1.51433	1	0.973	8.08479e-21	Yipf7	1.18865e-34	2.37046	1	0.582	2.59804e-30	Csrp3	8.48096e-19	2.1975	1	0.999	1.85368e-14
Ecrg4	8.23352e-57	6.44992	0.477	0.023	1.7996e-52	Cxcl2	6.16915e-39	4.69422	0.81	0.331	1.34839e-34	Cd300lg	3.48336e-55	4.51165	0.849	0.227	7.61358e-51	Zfp608	9.32217e-18	2.00336	0.961	0.958	2.03755e-13	Rnf185	5.7415e-10	3.78812	0.108	0.56	1.25492e-05	Slc16a1	1.95251e-15	1.48465	0.986	0.838	4.2676e-11	Ldhb	2.78065e-37	2.36108	1	0.964	6.07766e-33	Nppb	1.44218e-14	2.18542	0.981	0.91	3.15218e-10
Ptn	5.71689e-50	6.36132	0.732	0.193	1.24954e-45	Wfdc21	5.68502e-07	4.55255	0.143	0.037	0.0124258	Scgb3a1	6.63212e-19	4.37652	0.278	0.044	1.44958e-14	Pnck	1.44627e-22	1.99807	0.987	0.851	3.16112e-18	Zfp872	6.58746e-35	3.77108	1	0.882	1.43982e-30	Kcnk3	2.57533e-19	1.47862	1	0.923	5.6289e-15	Uqcrc1	2.31313e-33	2.2207	1	0.945	5.05581e-29	Klhl41	1.78677e-16	2.14787	1	0.755	3.90535e-12
Upk1b	1.83163e-17	6.31569	0.248	0.039	4.0034e-13	Il1b	2.55001e-35	4.44644	0.735	0.274	5.57356e-31	Cd36	4.0228e-48	4.11142	1	0.987	8.79262e-44	Cavin4	3.10895e-16	1.99041	0.987	0.917	6.79523e-12	Cacna2d4	3.46378e-27	3.73696	0.946	0.856	7.57078e-23	Srl	4.39505e-18	1.45517	1	0.931	9.60626e-14	Asb11	1.03367e-31	2.21442	1	0.71	2.2593e-27	Ankrd2	2.03698e-14	1.97184	0.577	0.164	4.45223e-10
Cxcl14	1.02377e-12	6.29013	0.322	0.09	2.23766e-08	Fpr1	1.84859e-09	4.39631	0.197	0.052	4.04047e-05	Gpihbp1	2.03013e-64	4.09526	0.968	0.324	4.43727e-60	Plin4	4.23072e-25	1.98135	1	0.882	9.24708e-21	Dda1	2.69858e-08	3.68057	0.257	0.738	0.000589828	Lynx1	7.49345e-16	1.43813	1	0.853	1.63784e-11	Got1	1.09515e-32	2.20111	1	0.901	2.39367e-28	Rras2	2.37485e-15	1.93856	0.981	0.753	5.19072e-11
Fstl1	7.91721e-82	6.28904	1	0.43	1.73046e-77	Cd14	6.22751e-52	4.25735	0.864	0.285	1.36115e-47	C1qtnf9	3.16909e-45	4.0445	0.651	0.12	6.92668e-41	Myocd	3.79367e-18	1.97104	1	0.943	8.29183e-14	Gas8	3.92254e-15	3.58485	0.797	0.59	8.5735e-11	Mlycd	1.84458e-13	1.42692	1	0.699	4.03169e-09	Mdh1	7.82858e-36	2.19945	1	0.993	1.71109e-31	Smpx	2.53025e-17	1.60012	1	0.948	5.53036e-13
C1qtnf3	6.27766e-22	6.27364	0.262	0.031	1.37211e-17	Mcemp1	9.36108e-13	4.21809	0.272	0.075	2.04605e-08	Thrsp	4.94037e-33	3.81129	0.873	0.468	1.07982e-28	Zbtb16	4.69385e-20	1.9393	0.974	0.95	1.02593e-15	Lipe	8.93751e-39	3.57901	1	0.994	1.95347e-34	Nrtn	9.27313e-10	1.38988	0.826	0.546	2.02683e-05	Sdhd	4.83374e-31	2.17128	1	0.892	1.05651e-26	Mt2	4.71922e-13	1.53147	1	0.891	1.03148e-08
Col1a2	1.33898e-74	6.23754	0.993	0.412	2.92661e-70	Arg1	4.12453e-23	4.1815	0.558	0.202	9.01498e-19	Fabp4	3.40501e-55	3.79645	0.992	0.616	7.44233e-51	Eef1a2	1.98141e-27	1.93659	1	0.937	4.33076e-23	Sppl2c	2.78075e-08	3.57476	0.203	0.047	0.000607788	Myl3	2.06233e-28	1.38918	1	1	4.50764e-24	Actc1	2.62585e-26	2.16893	1	0.999	5.73931e-22	Hsbp1l1	1.32316e-09	1.52471	0.558	0.172	2.89203e-05
Col1a1	6.03618e-67	6.06214	0.98	0.469	1.31933e-62	Ccl24	5.09635e-13	4.18144	0.299	0.088	1.11391e-08	Steap4	1.09823e-11	3.78065	0.389	0.146	2.40041e-07	Sp9	1.53289e-22	1.93488	1	0.961	3.35043e-18	Rnf14	4.59437e-09	3.57367	0.27	0.761	0.000100419	Efnb3	4.59431e-08	1.36544	0.725	0.434	0.00100418	Ces1d	9.7754e-29	2.15407	0.97	0.464	2.13661e-24	Rtn4	1.53919e-08	1.5236	0.981	0.883	0.000336422
Rcn3	2.15619e-82	6.00081	0.933	0.235	4.71279e-78	Cd83	2.32148e-17	4.15352	0.483	0.184	5.07406e-13	Adgrl4	1.81051e-60	3.76974	0.913	0.235	3.95723e-56	Mpnd	1.13815e-06	1.92947	0.727	0.743	0.0248765	Cdadc1	1.23978e-06	3.56094	0.324	0.771	0.0270978	Fbxo40	4.17204e-16	1.36237	1	0.896	9.11884e-12	Ttll1	8.86072e-32	2.15063	1	0.624	1.93669e-27	Ndufa1	1.8057e-21	1.47134	1	0.972	3.94671e-17
C3	4.91933e-35	5.81862	0.812	0.291	1.07522e-30	Ccl6	3.18903e-47	4.15206	0.898	0.365	6.97026e-43	Adgrf5	1.19509e-59	3.76095	0.984	0.369	2.61211e-55	Trim54	8.47493e-24	1.92815	1	0.908	1.85237e-19	Odr4	5.74169e-07	3.52406	0.378	0.824	0.0125496	Macrod1	1.81607e-17	1.36181	1	0.831	3.96937e-13	Hadhb	9.21297e-32	2.14516	1	0.976	2.01368e-27	Uqcrb	2.98525e-23	1.42896	1	0.997	6.52487e-19
Tnc	6.50477e-53	5.79734	0.826	0.235	1.42175e-48	Cd52	1.92883e-63	4.08787	0.952	0.326	4.21584e-59	Aqp1	9.62012e-41	3.70981	0.786	0.26	2.10267e-36	Tor2a	5.15145e-07	1.91049	0.104	0.402	0.0112595	Rpl36-ps4	3.6051e-14	3.52394	0.635	0.362	7.87967e-10	Clpb	1.22189e-08	1.35055	1	0.764	0.000267069	Acadm	9.35736e-33	2.12845	1	0.973	2.04524e-28	Ndufa4	9.07652e-17	1.4257	1	0.99	1.98386e-12
Mfap5	2.34885e-68	5.73022	0.913	0.268	5.13388e-64	Spp1	2.00592e-28	4.0084	0.721	0.306	4.38434e-24	Ly6a	3.04475e-58	3.66146	0.984	0.42	6.65492e-54	Kcnj11	5.85539e-07	1.90629	0.779	0.727	0.0127981	Grp	1.12009e-07	3.50987	0.108	0.013	0.00244818	Mb	7.29657e-23	1.33518	1	1	1.59481e-18	Atp5a1	3.06236e-33	2.04438	1	0.961	6.6934e-29	Hspb2	5.13837e-16	1.4231	1	0.788	1.12309e-11
Ccn5	4.16615e-48	5.68069	0.617	0.106	9.10596e-44	AB124611	4.18898e-10	3.9242	0.381	0.164	9.15586e-06	Sult1a1	3.69612e-40	3.5999	0.937	0.546	8.07861e-36	Trim63	1.62417e-18	1.89979	0.987	0.904	3.54996e-14	Pdcd2l	3.71853e-07	3.50812	0.149	0.534	0.00812759	Acss1	7.50357e-18	1.32721	1	0.821	1.64006e-13	Mgst3	1.52007e-34	2.02312	1	0.901	3.32242e-30	Atp5md	1.24213e-22	1.40866	1	0.994	2.71492e-18
Lum	6.22109e-75	5.62554	0.906	0.24	1.35974e-70	C5ar1	8.66996e-44	3.90542	0.816	0.265	1.89499e-39	Vtn	3.69064e-10	3.59149	0.31	0.107	8.06663e-06	Gm10800	1.27975e-09	1.87631	1	0.984	2.79714e-05	Mcts2	1.16513e-08	3.36715	0.068	0.45	0.000254662	Clip4	5.52189e-20	1.32372	1	0.835	1.20692e-15	Hadh	1.42575e-31	2.02286	1	0.901	3.11627e-27	Cystm1	9.53609e-18	1.4081	1	0.745	2.0843e-13
Mfap4	1.43217e-66	5.55745	0.725	0.108	3.13028e-62	Ccr1	1.73571e-35	3.89566	0.571	0.13	3.79375e-31	Aqp7	5.55537e-41	3.58732	0.73	0.213	1.21424e-36	Plcl2	6.32575e-16	1.87197	0.974	0.898	1.38262e-11	Ecd	1.28688e-06	3.35769	0.365	0.777	0.0281274	Got2	5.04313e-21	1.30946	1	0.949	1.10228e-16	Acaa2	4.72164e-33	2.00542	1	0.938	1.03201e-28	Cox7b	8.92815e-23	1.39224	1	0.999	1.95143e-18
Bgn	1.20085e-79	5.54663	0.993	0.417	2.62471e-75	Clec4a2	4.39916e-31	3.88596	0.599	0.174	9.61525e-27	Slc9a3r2	6.86181e-45	3.5804	0.897	0.384	1.49979e-40	Miga2	5.45363e-10	1.8542	0.831	0.781	1.192e-05	Gm525	7.56157e-11	3.34035	0.297	0.077	1.65273e-06	Bod1	1.89586e-11	1.30901	0.986	0.779	4.14378e-07	Mdh2	3.71473e-33	1.97034	1	0.991	8.11928e-29	Cycs	3.09588e-20	1.37014	1	0.997	6.76667e-16
Lox	1.15717e-77	5.53041	0.899	0.222	2.52923e-73	Lst1	8.34451e-32	3.8824	0.653	0.21	1.82386e-27	Ccdc85a	6.17886e-50	3.57845	0.722	0.145	1.35051e-45	Csdc2	8.74209e-08	1.84092	0.792	0.683	0.00191076	Wdr74	1.41676e-07	3.30842	0.203	0.646	0.00309661	Asb2	2.17603e-17	1.30792	1	0.89	4.75616e-13	Atp5b	6.1277e-35	1.95625	1	0.994	1.33933e-30	Synpo2l	1.94756e-10	1.36684	1	0.92	4.25679e-06
Dmkn	5.15229e-08	5.52987	0.282	0.114	0.00112614	Alox5ap	1.25599e-54	3.86102	0.884	0.279	2.74521e-50	Cyp4b1	7.09262e-25	3.5351	0.659	0.269	1.55023e-20	Dmpk	1.71535e-22	1.82531	1	0.956	3.74925e-18	Atpaf2	1.19682e-08	3.3061	0.176	0.595	0.000261588	Aldh4a1	3.97838e-10	1.30022	0.942	0.721	8.69555e-06	Aco2	2.82793e-29	1.88758	1	0.965	6.18101e-25	Ndufb6	8.44618e-18	1.36286	1	0.944	1.84608e-13
Cilp	4.50947e-40	5.46466	0.617	0.126	9.85634e-36	Ltb4r1	9.78605e-13	3.84401	0.218	0.046	2.13894e-08	Tspan7	6.46399e-45	3.53205	0.96	0.66	1.41283e-40	Fbxo31	3.31209e-08	1.82243	0.805	0.791	0.000723923	Ppy	6.46496e-11	3.29788	0.378	0.128	1.41305e-06	Ogdh	2.1614e-18	1.28551	1	0.991	4.72417e-14	Ddt	3.10117e-27	1.85972	1	0.627	6.77823e-23	Ndufc1	9.89322e-20	1.34659	1	0.983	2.16236e-15
Srpx2	6.93755e-73	5.43261	0.785	0.121	1.51634e-68	Clec4n	4.66247e-35	3.83658	0.646	0.179	1.01908e-30	Kcnj8	1.79986e-16	3.46762	0.46	0.157	3.93396e-12	Tcap	7.8953e-28	1.81196	1	0.994	1.72568e-23	Coq4	3.27225e-08	3.2617	0.081	0.461	0.000715215	Atp2a2	4.95735e-18	1.28264	1	1	1.08353e-13	Sdr39u1	5.76571e-29	1.85926	0.91	0.356	1.26021e-24	Cox7c	1.52274e-20	1.3392	1	0.993	3.32825e-16
Actg2	5.63144e-07	5.35525	0.268	0.126	0.0123086	Ccl3	8.63825e-25	3.77374	0.578	0.192	1.88806e-20	Grrp1	7.39288e-15	3.38704	0.357	0.104	1.61586e-10	Hand2	2.3509e-09	1.80824	0.883	0.835	5.13837e-05	Qpctl	9.12273e-29	3.23246	0.932	0.592	1.99395e-24	Rhot2	5.41723e-14	1.28215	0.957	0.783	1.18404e-09	Aldob	5.94051e-08	1.83625	0.388	0.141	0.00129842	Cox7a2	1.56975e-19	1.33663	1	0.984	3.431e-15
Kdelr3	3.43993e-89	5.30546	0.893	0.139	7.51865e-85	Tnfsf9	4.89798e-11	3.68168	0.381	0.15	1.07055e-06	Cav2	5.42477e-54	3.36775	0.96	0.348	1.18569e-49	Snta1	1.76051e-12	1.80287	0.883	0.792	3.84794e-08	Noc4l	8.81465e-07	3.21179	0.162	0.501	0.0192662	Myl2	3.69108e-26	1.27937	1	1	8.06759e-22	Ptgds	8.75185e-12	1.83623	0.985	0.896	1.91289e-07	Usp28	1.40547e-14	1.31596	1	0.818	3.07194e-10
Krt19	2.776e-14	5.26324	0.228	0.042	6.06751e-10	Ms4a4a	1.72498e-34	3.65992	0.646	0.176	3.77029e-30	Rbp7	6.99591e-52	3.35697	0.881	0.277	1.5291e-47	Lmod2	3.32032e-26	1.78383	1	0.999	7.25723e-22	Golga5	4.09013e-07	3.20184	0.284	0.705	0.00893981	Actn2	5.25809e-20	1.27918	1	0.987	1.14926e-15	Pdhb	3.10851e-29	1.8015	1	0.95	6.79427e-25	Mt1	4.38601e-14	1.31489	1	0.986	9.58651e-10
Wfdc18	9.31489e-27	5.21935	0.275	0.023	2.03596e-22	Ccr2	1.01226e-24	3.6422	0.551	0.186	2.2125e-20	Fmo1	3.14509e-34	3.34619	0.802	0.346	6.87422e-30	Trabd2b	5.6385e-20	1.78349	0.974	0.918	1.23241e-15	Adprh	4.09976e-08	3.19927	0.257	0.709	0.000896085	Coq8a	2.20198e-18	1.27568	0.986	0.886	4.81286e-14	Idh3g	5.22254e-27	1.77398	1	0.96	1.14149e-22	Atp5j	5.16234e-22	1.28445	1	0.999	1.12833e-17
Mgp	8.49214e-69	5.21185	0.987	0.404	1.85613e-64	Cfp	2.51296e-29	3.63297	0.776	0.331	5.49259e-25	Pdgfd	4.52747e-26	3.34593	0.643	0.246	9.89569e-22	Myh6	3.87897e-32	1.77232	1	1	8.47826e-28	Rab28	3.64831e-08	3.18587	0.338	0.785	0.000797412	Sbk1	5.19047e-12	1.26967	0.942	0.669	1.13448e-07	Maob	2.78192e-24	1.76311	0.97	0.494	6.08045e-20	Cfl2	7.43339e-15	1.27546	1	0.948	1.62472e-10
Col8a1	6.12939e-63	5.14721	0.872	0.281	1.3397e-58	Clec4d	1.67717e-38	3.62619	0.694	0.195	3.66579e-34	Id1	8.71421e-42	3.33704	0.873	0.339	1.90467e-37	Doc2g	1.32114e-12	1.77197	0.948	0.8	2.88763e-08	Pou3f3	1.31268e-23	3.17262	0.865	0.617	2.86913e-19	Mipep	3.7837e-11	1.26455	0.957	0.601	8.27003e-07	Fabp3	6.14792e-36	1.76293	1	0.999	1.34375e-31	Tnnc1	8.06382e-20	1.2738	1	1	1.76251e-15
Col5a2	2.05725e-83	5.13631	0.973	0.276	4.49653e-79	Fcer1g	2.80829e-61	3.57758	0.98	0.37	6.13808e-57	Tspan13	1.07774e-51	3.3115	0.929	0.331	2.35561e-47	Kcnk3	4.91361e-24	1.75521	1	0.923	1.07397e-19	Ngrn	3.46732e-07	3.1712	0.095	0.445	0.00757852	Gpam	1.82871e-14	1.24707	0.986	0.868	3.997e-10	Eci1	1.0615e-30	1.75706	1	0.896	2.32012e-26	Ndufa12	1.53163e-20	1.23404	1	0.979	3.34768e-16
Eln	1.8824e-46	5.02669	0.879	0.337	4.11436e-42	Plek	4.05339e-42	3.57696	0.83	0.3	8.85949e-38	Ntf3	2.32576e-17	3.30977	0.317	0.069	5.08342e-13	Mapt	1.28296e-09	1.73332	0.883	0.838	2.80416e-05	Ascl5	6.16948e-07	3.16446	0.203	0.055	0.0134846	Parm1	9.02161e-14	1.24384	1	0.879	1.97185e-09	Ndufa9	1.21394e-31	1.75561	1	0.937	2.65332e-27	Mpc1	1.57738e-13	1.22784	1	0.969	3.44769e-09
Thbs2	9.05397e-64	4.9289	0.886	0.225	1.97893e-59	Il1rn	3.20841e-16	3.57611	0.422	0.145	7.01262e-12	Fas	1.08777e-23	3.2975	0.817	0.479	2.37754e-19	Naxd	1.47267e-06	1.73081	0.299	0.664	0.0321882	Asb5	1.00513e-07	3.15739	0.23	0.655	0.00219692	Irx5	5.17377e-07	1.22935	0.623	0.367	0.0113083	Pdk4	3.70045e-24	1.74268	1	0.948	8.08807e-20	Ndufa5	1.55128e-19	1.22007	1	0.997	3.39063e-15
Aspn	1.04157e-58	4.8977	0.846	0.24	2.27656e-54	Fcgr1	2.36834e-28	3.56824	0.605	0.184	5.17649e-24	Tcim	8.21343e-50	3.27509	0.865	0.238	1.79521e-45	Kif1c	1.39504e-17	1.72142	0.987	0.955	3.04914e-13	Lipo3	1.22316e-07	3.15515	0.054	0.396	0.00267346	Vldlr	8.9863e-14	1.22245	1	0.902	1.96413e-09	Uqcrfs1	6.14508e-30	1.71277	1	0.955	1.34313e-25	Ndufb8	7.36701e-19	1.21361	1	0.986	1.61021e-14
Cd55	1.00928e-73	4.84338	0.852	0.147	2.20598e-69	Slpi	9.06107e-12	3.53196	0.286	0.086	1.98048e-07	Nepn	4.68116e-11	3.27318	0.206	0.044	1.02316e-06	Etfb	6.30562e-29	1.70106	1	0.985	1.37822e-24	Ankrd13a	2.00143e-09	3.14363	0.176	0.643	4.37453e-05	Cand2	1.81206e-11	1.22079	0.986	0.853	3.96061e-07	Fhl2	5.06128e-26	1.71269	1	0.963	1.10624e-21	Cox6c	1.54157e-20	1.19923	1	0.999	3.36942e-16
Sfrp1	1.58999e-64	4.79541	0.732	0.108	3.47524e-60	Clec4e	2.91001e-32	3.53196	0.612	0.184	6.36041e-28	Klk8	6.10126e-18	3.23315	0.476	0.162	1.33355e-13	Atp1a2	7.81996e-27	1.69799	1	1	1.70921e-22	Tmem185b	1.31999e-08	3.13197	0.095	0.488	0.00028851	H2-Ke6	1.69313e-08	1.2101	0.942	0.673	0.000370067	Fbp2	4.66602e-18	1.70484	0.896	0.513	1.01985e-13	Atp5o	3.15332e-18	1.19839	1	1	6.89221e-14
Fbn1	1.77533e-74	4.7814	0.987	0.426	3.88034e-70	Napsa	6.13716e-10	3.52942	0.327	0.132	1.3414e-05	Adh1	1.23733e-32	3.22636	0.587	0.153	2.70442e-28	Hrc	1.4913e-22	1.69607	1	0.958	3.25954e-18	Rnf19a	1.14147e-06	3.12978	0.257	0.705	0.0249492	Dgat2	2.98508e-15	1.20957	1	0.834	6.52449e-11	Shld1	6.84325e-23	1.68531	0.94	0.444	1.49573e-18	Atp5g1	8.12869e-17	1.16433	1	0.999	1.77669e-12
Maged2	7.83231e-65	4.77812	0.926	0.328	1.71191e-60	Ms4a8a	2.0611e-14	3.52669	0.299	0.078	4.50496e-10	Flt1	3.2771e-51	3.22022	0.952	0.408	7.16276e-47	Myo18a	1.54048e-19	1.69528	0.987	0.994	3.36702e-15	Elavl3	1.18336e-37	3.11501	1	0.999	2.58647e-33	Ldb3	4.312e-20	1.20836	1	0.965	9.42473e-16	Cox5a	1.70589e-32	1.68064	1	0.99	3.72857e-28	Ndufv2	1.43878e-17	1.1574	1	0.984	3.14475e-13
Col6a1	3.40879e-75	4.77169	0.946	0.299	7.4506e-71	Tnf	3.05888e-18	3.52596	0.435	0.142	6.68578e-14	Kdr	2.69383e-60	3.20249	0.968	0.302	5.8879e-56	Slc4a3	9.97831e-24	1.6905	0.987	0.966	2.18096e-19	Nploc4	2.1406e-08	3.11118	0.27	0.741	0.000467871	Plin5	1.31954e-09	1.19346	0.971	0.705	2.88411e-05	Acadvl	1.84917e-23	1.65419	1	0.644	4.04173e-19	Nppa	4.33236e-07	1.15558	0.942	0.691	0.00946925
Mmp23	4.14538e-71	4.75336	0.859	0.186	9.06056e-67	Lyz2	3.6297e-46	3.52034	0.952	0.443	7.93344e-42	Slc26a10	6.83481e-10	3.18392	0.492	0.274	1.49388e-05	Cdc34	1.9297e-11	1.68448	0.922	0.883	4.21774e-07	Coq3	7.30262e-10	3.10788	0.243	0.707	1.59613e-05	Hk2	2.16087e-16	1.18848	1	0.97	4.72301e-12	Nudt6	3.62992e-24	1.64983	0.672	0.163	7.93392e-20	Bcr	2.69801e-10	1.15166	0.808	0.515	5.89704e-06
Acta2	6.78074e-39	4.75034	0.906	0.477	1.48207e-34	Cd53	4.92759e-57	3.51225	0.898	0.246	1.07702e-52	Adgrg1	2.20362e-41	3.16137	0.841	0.304	4.81646e-37	Fyco1	1.22076e-18	1.68127	0.987	0.955	2.66821e-14	Pclo	1.43439e-26	3.07392	0.932	0.814	3.13514e-22	Clu	1.05656e-06	1.18681	1	0.957	0.0230932	Ndufa4	1.30291e-27	1.64544	1	0.99	2.84778e-23	Cox6b1	3.94886e-20	1.14663	1	0.997	8.63103e-16
Angptl7	8.28708e-22	4.73287	0.329	0.056	1.81131e-17	Slamf9	1.46132e-09	3.50352	0.347	0.155	3.19402e-05	Btnl9	3.93877e-38	3.15994	0.706	0.187	8.60898e-34	Serpine1	1.99738e-07	1.67762	0.883	0.887	0.00436568	Mterf2	5.90255e-07	3.0377	0.068	0.376	0.0129012	Popdc2	1.1935e-16	1.18545	1	0.949	2.60863e-12	Ndufs1	8.75462e-29	1.64191	1	0.948	1.9135e-24	Lgr4	3.6045e-14	1.1392	0.962	0.512	7.87835e-10
Gfpt2	9.78671e-71	4.73271	0.899	0.193	2.13908e-66	C1qb	8.23231e-31	3.50116	0.776	0.349	1.79934e-26	Sgk1	7.87703e-40	3.13998	0.937	0.446	1.72168e-35	Apbb1	4.97181e-10	1.67481	0.844	0.813	1.08669e-05	Pde7b	2.50962e-32	3.02719	0.986	0.999	5.48527e-28	Plin3	4.3943e-14	1.18432	1	0.87	9.60463e-10	Pygm	8.65682e-29	1.64034	1	0.709	1.89212e-24	Ankrd1	1.0179e-09	1.12169	1	0.996	2.22481e-05
Itm2a	7.88096e-67	4.72864	0.772	0.132	1.72254e-62	Gm9733	6.53275e-19	3.49951	0.238	0.031	1.42786e-14	Esam	1.94265e-47	3.13525	0.889	0.282	4.24604e-43	Obscn	2.58952e-27	1.67434	1	0.997	5.65992e-23	Abce1	6.40659e-15	3.02314	0.23	0.805	1.40029e-10	Cox6a2	3.02781e-22	1.17853	1	0.999	6.61789e-18	Gpc1	1.95285e-18	1.63617	0.94	0.594	4.26835e-14	Atp5j2	1.19193e-19	1.11828	1	0.999	2.6052e-15
Efemp1	1.57808e-18	4.69832	0.302	0.059	3.44921e-14	Ltc4s	7.84012e-08	3.47972	0.361	0.182	0.00171362	Car8	2.06277e-29	3.13035	0.635	0.184	4.50861e-25	Nde1	3.76002e-08	1.66178	0.208	0.594	0.000821827	Uba3	3.04358e-10	3.02279	0.297	0.811	6.65236e-06	Fbxo31	2.1427e-09	1.17128	0.971	0.775	4.6833e-05	Slc25a11	8.31567e-28	1.63441	1	0.916	1.81756e-23	Fgl2	5.32542e-11	1.11663	0.981	0.681	1.16398e-06
Sfrp2	2.18067e-58	4.69536	0.671	0.096	4.76629e-54	Clec4a3	3.44544e-29	3.47638	0.599	0.181	7.53071e-25	Mylip	6.44158e-17	3.12846	0.619	0.302	1.40794e-12	Myh7	4.79101e-17	1.653	1	0.978	1.04717e-12	Mypop	9.0384e-08	3.01668	0.446	0.246	0.00197552	Doc2g	4.39443e-14	1.16644	0.986	0.798	9.6049e-10	Cabcoco1	1.04856e-21	1.62949	0.761	0.248	2.29184e-17	Lmcd1	1.21465e-10	1.11181	0.981	0.666	2.65485e-06
Rbp1	7.10727e-87	4.65382	0.98	0.257	1.55344e-82	Cd86	1.92967e-29	3.45235	0.619	0.189	4.21768e-25	Kitl	1.11054e-37	3.11958	0.889	0.457	2.42731e-33	Nfe2l1	3.11977e-17	1.6367	0.987	0.994	6.81889e-13	Zfp653	2.34021e-34	3.0166	0.986	0.994	5.11499e-30	Cish	8.12062e-11	1.16365	0.928	0.811	1.77492e-06	Pxmp2	2.50932e-26	1.62402	1	0.666	5.48461e-22	Ndufb9	1.40104e-16	1.10652	1	0.99	3.06225e-12
Ptgis	2.64963e-63	4.64043	0.879	0.255	5.79129e-59	Cd163	1.61509e-11	3.44646	0.374	0.145	3.5301e-07	Lims2	1.47855e-39	3.02687	0.865	0.339	3.23168e-35	Aldh2	5.52306e-07	1.63567	0.857	0.842	0.0120718	Irak1	3.67301e-08	3.00175	0.338	0.885	0.000802811	Ckm	1.27095e-15	1.15739	1	0.98	2.77792e-11	Nudt7	6.90677e-27	1.61602	1	0.684	1.50961e-22	1110002E22Rik	8.22461e-09	1.09342	0.981	0.818	0.000179765
Lrrc17	9.67557e-67	4.64019	0.624	0.054	2.11479e-62	Pilrb2	1.7025e-12	3.43928	0.245	0.06	3.72115e-08	Hrct1	7.66978e-25	2.99034	0.571	0.176	1.67638e-20	Larp1b	1.83088e-06	1.63299	0.831	0.877	0.0400176	Pcdhga12	2.40494e-37	2.99801	1	0.984	5.25648e-33	Usp13	2.67209e-17	1.13985	1	0.949	5.84038e-13	Adhfe1	7.71493e-19	1.60717	0.985	0.66	1.68625e-14	Ndufs5	1.66952e-18	1.0927	1	0.945	3.64906e-14
Steap1	2.31497e-39	4.63501	0.383	0.029	5.05983e-35	Cd300c2	3.1117e-27	3.43126	0.571	0.178	6.80125e-23	S1pr1	7.20857e-48	2.989	0.984	0.616	1.57558e-43	Wnk2	8.30235e-07	1.63173	0.74	0.692	0.0181465	Vta1	1.8161e-10	2.99745	0.135	0.59	3.96946e-06	Gpc1	1.08255e-06	1.13661	0.841	0.603	0.0236612	Rhd	6.96281e-10	1.59772	0.493	0.183	1.52186e-05	Uck2	1.24159e-10	1.09229	0.981	0.815	2.71375e-06
Ctsk	1.49021e-54	4.63159	0.705	0.141	3.25716e-50	Ms4a6c	8.51057e-42	3.41414	0.83	0.283	1.86015e-37	Rsad2	3.56431e-18	2.98613	0.54	0.197	7.7905e-14	Rhobtb1	1.12685e-10	1.63051	0.883	0.832	2.46296e-06	Ccdc151	1.26279e-19	2.98524	0.851	0.687	2.76009e-15	Hrc	3.61172e-17	1.13365	1	0.958	7.89413e-13	Etfa	1.24485e-28	1.59486	1	0.984	2.72087e-24	1500009L16Rik	1.82066e-10	1.0871	0.808	0.413	3.97941e-06
Dcn	5.69594e-71	4.6263	0.993	0.412	1.24496e-66	Tyrobp	1.70984e-60	3.3991	0.973	0.371	3.73721e-56	Cxcl12	3.14471e-38	2.98472	0.913	0.471	6.87339e-34	Mast2	2.75406e-12	1.6282	0.961	0.942	6.01955e-08	Mroh2a	4.45848e-20	2.98336	0.811	0.539	9.7449e-16	Slc41a3	7.37647e-09	1.12723	0.87	0.574	0.000161227	Mpc1	7.62179e-24	1.58648	1	0.968	1.6659e-19	Cox5a	9.31053e-15	1.0837	1	0.99	2.035e-10
Pcolce	9.8506e-68	4.61743	0.966	0.392	2.15305e-63	Pf4	2.43327e-29	3.38582	0.748	0.319	5.3184e-25	Tmigd1	7.38015e-14	2.97263	0.151	0.014	1.61308e-09	Pabpn1	3.11186e-11	1.62233	0.831	0.705	6.8016e-07	Gm14326	2.04604e-07	2.95508	0.081	0.44	0.00447203	Cpeb3	7.68712e-11	1.12663	0.928	0.689	1.68017e-06	Cmbl	1.62143e-26	1.57751	0.985	0.457	3.54396e-22	Cox5b	1.09062e-18	1.072	1	0.993	2.38377e-14
Islr	1.8942e-64	4.59	0.664	0.074	4.14015e-60	Ptgs2	2.36669e-10	3.38138	0.469	0.241	5.17289e-06	Rnf125	1.11629e-21	2.96592	0.548	0.173	2.43988e-17	Rbm24	1.15057e-20	1.61425	0.974	0.911	2.5148e-16	Fubp3	1.19029e-28	2.95411	1	0.958	2.60161e-24	Rbm24	6.23317e-15	1.12284	1	0.909	1.36238e-10	Ndufs7	1.85566e-29	1.57456	1	0.973	4.05591e-25	Ndufb3	3.23119e-16	1.0635	1	0.932	7.06241e-12
Pbk	4.37192e-33	4.58491	0.443	0.072	9.5557e-29	Wfdc17	4.49383e-51	3.36423	0.905	0.319	9.82217e-47	Abcg2	1.98213e-31	2.94105	0.889	0.529	4.33235e-27	Ryr2	1.11944e-27	1.61348	1	0.997	2.44677e-23	Ckb	2.11962e-08	2.95176	0.257	0.671	0.000463286	Coq10a	3.10927e-13	1.12232	1	0.798	6.79593e-09	Atp5c1	1.16846e-29	1.56621	1	0.988	2.5539e-25	Cav3	2.4563e-12	1.05906	1	0.772	5.36874e-08
Fbln5	1.97591e-74	4.58424	0.866	0.163	4.31874e-70	Ptpn6	2.05305e-31	3.36048	0.728	0.28	4.48736e-27	Podxl	1.22347e-37	2.92822	0.794	0.263	2.67414e-33	Dynll2	6.84969e-20	1.60914	0.974	0.902	1.49714e-15	Mesp1	1.61487e-07	2.9434	0.149	0.028	0.00352962	Atp5g3	8.45382e-17	1.11417	1	0.99	1.84775e-12	Ndufs3	9.81684e-30	1.5541	1	0.901	2.14567e-25	Cox4i1	6.51598e-17	1.05111	1	0.999	1.4242e-12
Tagln	1.47023e-61	4.57903	0.779	0.154	3.21347e-57	Tarm1	2.20757e-12	3.34745	0.224	0.052	4.82508e-08	Klra9	1.04189e-10	2.90396	0.19	0.039	2.27725e-06	Ilrun	1.10772e-08	1.6027	0.935	0.874	0.000242115	Pla2g4f	1.01106e-06	2.94225	0.243	0.083	0.0220988	Dusp8	1.02339e-10	1.1138	0.928	0.725	2.23682e-06	Suclg1	7.50423e-28	1.55398	1	0.916	1.6402e-23	Ndufb7	3.70486e-18	1.04364	1	0.993	8.0977e-14
Loxl1	8.97851e-72	4.5727	0.953	0.309	1.96243e-67	C1qc	1.64817e-29	3.34267	0.721	0.285	3.6024e-25	Cav1	1.48161e-53	2.90144	0.984	0.463	3.23836e-49	Pde4dip	1.80497e-25	1.60182	1	1	3.94511e-21	Ercc6l	1.07671e-17	2.94066	0.838	0.671	2.35336e-13	Casq2	7.59309e-15	1.11167	1	0.957	1.65962e-10	Cpt2	6.84552e-26	1.55345	1	0.777	1.49623e-21	Mpc2	5.75751e-15	1.04182	1	0.977	1.25842e-10
Sparc	2.95287e-73	4.53864	1	0.789	6.45408e-69	Cd300ld	4.11536e-33	3.33912	0.741	0.252	8.99495e-29	Depp1	3.3631e-45	2.89263	0.944	0.496	7.35072e-41	Rabl6	2.08061e-13	1.59908	0.935	0.917	4.54759e-09	Ano8	2.51849e-20	2.93076	0.838	0.556	5.50466e-16	Cox8b	2.47195e-22	1.10589	1	0.997	5.40293e-18	Pln	1.05104e-28	1.54647	1	1	2.29726e-24	Fxyd1	3.17101e-16	1.03471	1	0.98	6.93088e-12
Igfbp6	1.69302e-48	4.42726	0.705	0.145	3.70042e-44	Tgfbi	2.98415e-38	3.32597	0.884	0.365	6.52245e-34	Tcf15	1.03665e-34	2.88673	0.54	0.099	2.2658e-30	Vegfb	3.07435e-19	1.58899	0.974	0.93	6.71961e-15	Pgam5	1.35346e-10	2.92805	0.162	0.645	2.95827e-06	Gaa	7.42332e-07	1.10361	0.942	0.764	0.0162252	Idh3b	4.19001e-29	1.54162	1	0.958	9.15811e-25	Myot	7.27404e-10	1.02649	0.904	0.471	1.58989e-05
Plvap	5.78578e-34	4.40333	0.517	0.105	1.2646e-29	C1qa	4.70981e-27	3.32294	0.694	0.277	1.02942e-22	44078	4.65559e-24	2.86675	0.714	0.306	1.01757e-19	Ets1	1.353e-12	1.58281	0.039	0.488	2.95725e-08	Tmem209	2.15246e-21	2.92331	0.905	0.881	4.70464e-17	Mybpc3	1.31986e-14	1.10273	1	1	2.88482e-10	Nt5c1a	1.9033e-14	1.5286	0.567	0.17	4.16003e-10	Ndufab1	1.86176e-16	1.02639	1	0.99	4.06925e-12
Krt18	4.62957e-10	4.37727	0.282	0.093	1.01188e-05	Cd48	2.65619e-25	3.31447	0.537	0.16	5.80563e-21	Ptprb	3.89535e-43	2.86111	0.929	0.408	8.51406e-39	Ogdhl	3.78476e-16	1.58195	1	0.937	8.27235e-12	Pgm1	1.07573e-06	2.91328	0.162	0.559	0.0235123	Usp28	2.66033e-09	1.10186	0.986	0.815	5.81468e-05	Nipsnap2	9.15435e-28	1.50781	1	0.945	2.00087e-23	Xirp2	1.83593e-06	1.02485	1	1	0.040128
Nkain4	5.97788e-13	4.33018	0.248	0.059	1.30659e-08	Samsn1	7.69658e-17	3.31083	0.531	0.225	1.68224e-12	Thsd1	5.90286e-11	2.85923	0.429	0.178	1.29019e-06	Rbm20	3.5507e-10	1.57768	0.948	0.92	7.76077e-06	Lonp2	4.57927e-07	2.89803	0.311	0.731	0.0100089	Cdc34	1.64412e-12	1.09756	1	0.876	3.59356e-08	Sdhc	2.66889e-30	1.49905	1	0.963	5.8334e-26	H4c8	7.98837e-14	1.02382	0.962	0.587	1.74602e-09
Itgbl1	7.81592e-67	4.30775	0.732	0.108	1.70833e-62	Tmem37	8.43028e-13	3.29978	0.51	0.243	1.84261e-08	Xdh	3.79819e-23	2.8456	0.841	0.506	8.3017e-19	Prpf19	1.97063e-12	1.5723	0.896	0.893	4.30721e-08	Trip6	1.5489e-06	2.89098	0.135	0.479	0.0338542	Opa3	4.99643e-14	1.09498	0.986	0.824	1.09207e-09	Phyh	4.41658e-27	1.49746	1	0.948	9.65333e-23	Uqcr11	9.04045e-18	1.02181	1	0.999	1.97597e-13
Fn1	3.99399e-60	4.27497	0.966	0.48	8.72966e-56	Ifi209	6.38217e-10	3.29696	0.333	0.134	1.39495e-05	Itpripl1	2.32441e-23	2.80677	0.69	0.312	5.08046e-19	Tns1	3.91014e-24	1.57215	1	0.996	8.5464e-20	Tcaim	9.94347e-07	2.88392	0.176	0.578	0.0217335	Msrb1	9.938e-10	1.09221	1	0.897	2.17215e-05	Rasl2-9	8.60877e-07	1.49452	0.313	0.108	0.0188162	Ndufa13	3.11717e-18	1.01956	1	0.996	6.81321e-14
Ddah1	4.87828e-50	4.26004	0.866	0.346	1.06625e-45	Hck	1.04654e-18	3.28802	0.517	0.186	2.28742e-14	Fzd4	6.67039e-27	2.79787	0.841	0.468	1.45795e-22	Twf2	7.26012e-11	1.56799	0.909	0.886	1.58684e-06	Zfp617	3.30228e-08	2.87766	0.108	0.509	0.00072178	Pgm5	5.09363e-11	1.08729	0.913	0.62	1.11331e-06	Ndufaf1	9.80808e-19	1.48782	0.94	0.605	2.14375e-14	Cox6a2	1.19289e-15	1.01727	1	0.999	2.60731e-11
Fmod	1.2278e-34	4.2225	0.53	0.105	2.6836e-30	H2-Eb1	1.50506e-08	3.2863	0.401	0.202	0.00032896	Fli1	4.00594e-36	2.77133	0.905	0.436	8.75579e-32	Ptov1	4.44649e-14	1.56179	0.896	0.865	9.71869e-10	Chchd5	6.18463e-08	2.87447	0.108	0.499	0.00135177	Smpd1	1.42044e-12	1.0861	1	0.837	3.10466e-08	Ephx2	1.88913e-20	1.4856	1	0.869	4.12907e-16	Myl12a	2.06325e-08	1.01634	1	0.983	0.000450964
Mdk	4.85522e-63	4.20402	0.725	0.116	1.06121e-58	Pla2g7	2.3376e-33	3.28451	0.741	0.269	5.1093e-29	Gimap9	5.86843e-19	2.76148	0.516	0.175	1.28266e-14	Scn5a	1.41696e-14	1.54572	0.974	0.906	3.09706e-10	Rela	4.77742e-07	2.87142	0.243	0.62	0.010442	Slc2a4	6.89045e-15	1.08574	1	0.818	1.50605e-10	Decr1	3.24732e-27	1.48502	1	0.898	7.09767e-23	Sgcg	3.71941e-12	1.01628	1	0.794	8.1295e-08
Tm4sf1	1.78882e-52	4.18013	0.987	0.431	3.90982e-48	Ctss	3.95873e-51	3.28123	0.932	0.37	8.6526e-47	Cdh5	2.67812e-49	2.76118	0.952	0.339	5.85357e-45	Gatd3a	8.29257e-21	1.54381	0.961	0.817	1.81251e-16	Hectd3	1.14561e-08	2.85854	0.135	0.552	0.000250396	Nkx2-5	7.04598e-13	1.08469	0.913	0.639	1.54004e-08	Sdhb	3.47623e-31	1.4795	1	0.99	7.59799e-27	Uqcrh	9.56912e-18	1.01033	1	0.999	2.09152e-13
Upk3b	6.70907e-14	4.15213	0.289	0.072	1.4664e-09	Cytip	2.85855e-18	3.27584	0.524	0.213	6.24794e-14	Ramp2	2.46668e-47	2.75682	0.937	0.331	5.39142e-43	Psme4	3.20565e-16	1.54136	1	0.98	7.00659e-12	Prpsap1	6.02697e-08	2.85673	0.216	0.627	0.00131731	Rtn4ip1	2.99065e-08	1.0789	0.884	0.665	0.000653666	Sdha	2.98414e-28	1.4795	1	0.965	6.52244e-24	Sorbs2	9.63909e-12	0.994503	1	0.982	2.10682e-07
Tpm2	5.10178e-47	4.14142	0.846	0.33	1.1151e-42	Ccl4	2.54631e-16	3.27549	0.456	0.155	5.56548e-12	Vsig2	7.9377e-12	2.75678	0.31	0.093	1.73494e-07	Zxdc	3.95046e-12	1.53057	0.896	0.813	8.63451e-08	Tll2	4.289e-19	2.85501	0.757	0.403	9.37446e-15	Nudt3	3.86517e-12	1.06988	1	0.864	8.4481e-08	Crat	1.33344e-25	1.47849	1	0.898	2.9145e-21	Ndufs4	1.4586e-12	0.982421	1	0.941	3.18807e-08
C1s1	1.38739e-38	4.09404	0.57	0.114	3.03242e-34	Mpeg1	9.67471e-29	3.26517	0.68	0.236	2.1146e-24	Gpr4	7.0171e-44	2.75645	0.833	0.257	1.53373e-39	Eif5b	1.58741e-19	1.52784	1	0.993	3.46961e-15	Egln3	4.10638e-07	2.85448	0.189	0.582	0.00897531	Rrad	7.02568e-11	1.06038	0.971	0.831	1.5356e-06	Ndufs2	1.79402e-26	1.47414	1	0.947	3.92118e-22	Atp5h	1.06481e-16	0.979939	1	0.996	2.32735e-12
Col5a1	2.98288e-63	4.04627	0.933	0.312	6.51967e-59	Cybb	4.47805e-36	3.26331	0.776	0.288	9.78767e-32	Tmem88	4.36338e-54	2.74559	0.905	0.252	9.53704e-50	Lynx1	2.91275e-07	1.52647	0.896	0.863	0.00636641	Blcap	3.09427e-11	2.85128	0.122	0.607	6.76315e-07	Frmd5	2.66315e-13	1.05389	1	0.785	5.82085e-09	Cox4i1	1.48432e-32	1.47225	1	0.999	3.24428e-28	Pdlim5	1.47168e-12	0.979402	1	0.984	3.21666e-08
Smoc1	1.8247e-34	4.04615	0.497	0.087	3.98826e-30	Ccl9	8.27746e-39	3.25351	0.803	0.293	1.8092e-34	Egfl7	3.34034e-50	2.73538	0.952	0.343	7.30098e-46	Gm10801	8.90079e-10	1.52135	1	0.899	1.94545e-05	Ccdc201	5.37916e-09	2.84989	0.365	0.14	0.000117572	Inpp5a	1.32357e-12	1.0516	0.971	0.84	2.89294e-08	Calr3	2.14603e-20	1.47001	0.806	0.294	4.69059e-16	Clybl	6.38573e-15	0.969557	1	0.839	1.39573e-10
Ogn	6.36608e-26	4.01295	0.933	0.743	1.39143e-21	Dpep2	1.5177e-30	3.23135	0.68	0.251	3.31723e-26	Grap	4.33731e-21	2.70269	0.556	0.18	9.48007e-17	Tmem159	1.82747e-06	1.51909	0.247	0.561	0.0399431	Eif2b1	1.69805e-06	2.84569	0.284	0.639	0.0371144	Pkp2	4.96674e-12	1.05018	1	0.908	1.08558e-07	Acadl	1.63247e-26	1.46916	1	0.973	3.56809e-22	Cxcr6	4.39564e-09	0.963498	0.404	0.121	9.60754e-05
F2r	3.90391e-59	3.98548	0.913	0.324	8.53278e-55	Gm5150	2.9665e-08	3.22418	0.163	0.041	0.000648388	Apold1	1.59295e-39	2.70098	0.81	0.252	3.48172e-35	Gpam	1.39858e-08	1.51334	0.922	0.874	0.000305688	Epha3	9.60871e-24	2.84402	0.878	0.574	2.10018e-19	Dnajb2	1.47668e-13	1.04914	1	0.798	3.22758e-09	Hsdl2	2.16206e-27	1.46715	1	0.811	4.7256e-23	Rasl2-9	8.24986e-07	0.958473	0.346	0.11	0.0180317
Msln	2.47081e-13	3.98234	0.342	0.103	5.40045e-09	Tlr13	6.4952e-27	3.21921	0.531	0.142	1.41966e-22	Cyyr1	1.58901e-48	2.69915	0.849	0.263	3.47309e-44	Eef1akmt1	1.46876e-06	1.51305	0.221	0.591	0.0321027	Tagap	3.56381e-32	2.84265	0.959	0.799	7.78942e-28	Sspn	1.44542e-11	1.044	1	0.866	3.15925e-07	Tpd52l1	2.76432e-15	1.45569	0.612	0.207	6.04197e-11	Sdhb	2.58392e-14	0.951675	1	0.99	5.64766e-10
Srpx	2.67706e-48	3.97431	0.483	0.042	5.85125e-44	Clec4a1	3.68625e-27	3.21871	0.551	0.16	8.05705e-23	Clec1a	6.55636e-28	2.6735	0.643	0.195	1.43302e-23	Fhod3	2.25247e-15	1.51236	1	0.923	4.92323e-11	Tbx10	4.97605e-07	2.83207	0.176	0.041	0.0108761	Fam174b	3.11179e-11	1.04348	1	0.815	6.80144e-07	Atp2a2	1.1814e-25	1.45233	1	1	2.58218e-21	Uqcr10	3.57257e-16	0.945559	1	0.993	7.80856e-12
Sprr2a3	8.76985e-15	3.96162	0.121	0.005	1.91683e-10	Ebi3	6.56532e-08	3.20382	0.204	0.065	0.00143498	Nck1	1.00405e-21	2.65811	0.857	0.575	2.19456e-17	Ivd	1.15848e-15	1.51179	0.987	0.921	2.53209e-11	Mrpl10	9.4037e-16	2.83156	0.149	0.741	2.05537e-11	Tesc	2.7954e-12	1.03798	1	0.766	6.1099e-08	Fh1	9.33829e-25	1.44839	1	0.901	2.04107e-20	Atp5mpl	6.85043e-16	0.942583	1	0.992	1.4973e-11
Bace2	3.64045e-50	3.94356	0.698	0.139	7.95693e-46	Spi1	2.13566e-43	3.17305	0.81	0.267	4.66791e-39	Myct1	1.35909e-53	2.65263	0.873	0.202	2.97056e-49	Clip1	1.16573e-17	1.51068	1	0.994	2.54795e-13	Hmbs	1.77077e-07	2.82586	0.243	0.693	0.00387037	Ndufa11	1.22233e-14	1.03743	1	0.977	2.67165e-10	Tango2	1.87987e-26	1.44366	0.955	0.509	4.10882e-22	Ndufs6	7.11175e-16	0.939024	1	0.987	1.55441e-11
Csrp2	3.35962e-62	3.92849	0.919	0.346	7.34311e-58	Fcgr3	2.21743e-47	3.17097	0.871	0.309	4.84664e-43	Mgll	6.14214e-33	2.64556	0.96	0.794	1.34249e-28	Myom1	3.2871e-24	1.50175	1	0.994	7.18461e-20	Phf10	9.31153e-07	2.80519	0.23	0.604	0.0203522	Kcng2	8.49176e-13	1.03667	0.971	0.782	1.85604e-08	Ndufs4	1.84534e-26	1.42995	1	0.939	4.03337e-22	Polr2l	1.82814e-14	0.938342	1	0.88	3.99576e-10
Fbln2	4.73169e-66	3.92318	0.973	0.426	1.03421e-61	Osm	5.02372e-22	3.16649	0.429	0.107	1.09803e-17	Jam2	4.30975e-25	2.64462	0.905	0.721	9.41982e-21	Hadha	2.99502e-21	1.4958	1	0.984	6.54621e-17	Vwa7	2.49194e-15	2.80138	0.784	0.722	5.44664e-11	Lpgat1	8.28509e-11	1.03517	0.986	0.86	1.81087e-06	Mb	2.10205e-27	1.42609	1	1	4.59446e-23	Strit1	3.60496e-11	0.937814	0.942	0.56	7.87935e-07
Calcb	2.15605e-12	3.92302	0.154	0.02	4.71248e-08	Tlr7	4.86532e-17	3.15025	0.435	0.148	1.06341e-12	Cpm	1.51323e-08	2.63513	0.349	0.153	0.000330747	Lamb2	3.19538e-13	1.49201	0.974	0.949	6.98415e-09	Asna1	4.38569e-08	2.79876	0.243	0.7	0.00095858	Atp5d	3.79193e-18	1.02948	1	0.971	8.28801e-14	Coq9	8.3398e-22	1.42489	1	0.888	1.82283e-17	S100a1	2.43154e-14	0.93169	1	0.989	5.31461e-10
Gpm6a	7.37217e-34	3.88962	0.403	0.052	1.61133e-29	Neurl3	2.09723e-11	3.14867	0.469	0.23	4.58392e-07	Cavin2	1.09616e-35	2.62442	0.976	0.775	2.39588e-31	Mybpc3	2.84272e-23	1.49115	1	1	6.21333e-19	2310057M21Rik	8.30011e-16	2.7971	0.851	0.853	1.81415e-11	Lrrc10	5.72339e-11	1.02723	0.986	0.853	1.25096e-06	Atp5pb	1.89145e-32	1.42207	1	0.973	4.13415e-28	Ndufa11	8.88671e-15	0.931567	1	0.977	1.94237e-10
Gja4	7.71926e-34	3.85157	0.523	0.108	1.6872e-29	P2ry6	1.50237e-19	3.14802	0.585	0.233	3.28372e-15	Mall	1.6792e-16	2.61834	0.468	0.15	3.67022e-12	Coro6	2.50728e-19	1.48829	0.987	0.902	5.48016e-15	Ccer2	3.22468e-08	2.77474	0.176	0.035	0.000704819	Hadha	1.97654e-15	1.02671	1	0.984	4.32013e-11	Pnpla2	1.7294e-21	1.40914	1	0.886	3.77994e-17	Uqcrq	3.89907e-15	0.92646	1	0.996	8.5222e-11
Fkbp11	1.59952e-51	3.8127	0.886	0.355	3.49608e-47	Pirb	1.73637e-33	3.12922	0.755	0.285	3.79519e-29	Kcna5	2.55378e-36	2.6097	0.619	0.134	5.58179e-32	Eif4g1	4.31865e-16	1.48681	1	0.972	9.43927e-12	Ormdl3	2.6661e-10	2.76246	0.216	0.716	5.8273e-06	Chchd10	6.40838e-17	1.01588	1	0.981	1.40068e-12	Gapdh	6.45023e-27	1.40469	1	0.993	1.40983e-22	Tnfrsf12a	1.01757e-10	0.92635	1	0.752	2.22411e-06
Ccdc80	1.29736e-67	3.79412	0.987	0.472	2.83563e-63	Rgs10	3.51687e-20	3.1272	0.605	0.265	7.68681e-16	Rgs5	6.37407e-26	2.60916	0.873	0.504	1.39318e-21	Des	1.73369e-25	1.4853	1	1	3.78932e-21	Mpv17l2	1.39683e-06	2.75271	0.054	0.358	0.0305306	Trim63	1.55338e-13	1.01584	1	0.903	3.39522e-09	Etfdh	1.97418e-28	1.39606	1	0.901	4.31497e-24	Timm8b	5.97816e-16	0.92443	1	0.891	1.30665e-11
Anxa1	9.00654e-72	3.7916	1	0.441	1.96856e-67	Bcl2a1b	1.81873e-41	3.12287	0.741	0.207	3.97521e-37	Epas1	1.21866e-41	2.60665	0.992	0.868	2.66363e-37	Dhrs7c	3.18374e-09	1.48175	0.883	0.762	6.95869e-05	Atp4a	1.23983e-10	2.75193	0.351	0.109	2.70989e-06	Lpin1	1.43323e-16	1.01389	1	0.921	3.1326e-12	Rxrg	3.41442e-24	1.39454	0.97	0.543	7.46291e-20	Chrm2	6.96786e-11	0.919689	1	0.784	1.52296e-06
Gsn	8.47013e-34	3.79138	0.906	0.456	1.85132e-29	Bst1	3.59365e-16	3.12238	0.408	0.137	7.85464e-12	Arl4d	5.42389e-10	2.60273	0.413	0.187	1.1855e-05	Dsg2	7.50011e-14	1.48081	0.948	0.811	1.6393e-09	Mad2l1bp	2.0186e-10	2.7498	0.095	0.544	4.41206e-06	Nek9	3.11007e-08	1.01046	1	0.853	0.000679768	S100a1	4.48018e-30	1.38816	1	0.988	9.79232e-26	Atpif1	1.07695e-12	0.918376	1	0.976	2.3539e-08
Mxra8	2.51195e-71	3.77478	0.893	0.199	5.49038e-67	Gpr183	2.22748e-07	3.12013	0.34	0.171	0.0048686	Hpcal1	1.07789e-25	2.59101	0.794	0.353	2.35595e-21	Pdk2	9.84422e-15	1.47833	0.974	0.901	2.15165e-10	Pex7	9.80214e-07	2.74331	0.23	0.63	0.0214245	Ndufa5	2.38239e-17	1.00956	1	0.997	5.20719e-13	Mtfp1	1.26093e-22	1.37773	1	0.712	2.75602e-18	Hsd17b10	7.78381e-12	0.916656	1	0.911	1.70131e-07
Col6a2	4.89515e-67	3.76627	0.96	0.368	1.06993e-62	Fcgr2b	3.75475e-41	3.11378	0.823	0.296	8.20676e-37	Timp3	2.25834e-29	2.57877	0.905	0.474	4.93606e-25	Sorbs1	5.56178e-22	1.47761	1	0.994	1.21564e-17	Acot11	1.72525e-07	2.74314	0.608	0.505	0.00377088	Ndufv3	6.05822e-19	1.00871	1	0.99	1.32414e-14	Clybl	8.20614e-22	1.37054	1	0.836	1.79362e-17	Tmem38b	5.04033e-10	0.912559	0.923	0.499	1.10167e-05
Ccn4	4.15178e-41	3.76577	0.711	0.24	9.07454e-37	Csf1r	4.67901e-44	3.10956	0.891	0.339	1.02269e-39	Cables2	5.38538e-09	2.57865	0.571	0.356	0.000117708	Gm9774	1.41213e-09	1.46911	0.831	0.808	3.0865e-05	Spertl	8.07291e-09	2.74205	0.338	0.124	0.00017645	Tom1l2	3.58283e-16	1.0029	1	0.809	7.83099e-12	Hsd17b10	1.87172e-24	1.35842	1	0.909	4.09103e-20	Nnt	1.57842e-11	0.909948	1	0.922	3.44995e-07
Cdc20	6.66709e-31	3.75693	0.463	0.087	1.45723e-26	Sash3	3.12052e-09	3.10825	0.259	0.091	6.82053e-05	Apol10b	2.36914e-14	2.56893	0.302	0.074	5.17823e-10	Akap1	7.68324e-07	1.46772	0.818	0.817	0.0167932	Snapc2	4.7709e-08	2.7397	0.135	0.54	0.00104278	Cav3	5.76714e-09	0.998812	0.957	0.77	0.000126052	Pmpcb	1.04265e-23	1.3551	1	0.784	2.27891e-19	Mrpl33	1.00744e-16	0.909887	1	0.941	2.20195e-12
Tnfaip6	1.27827e-46	3.7439	0.584	0.088	2.79392e-42	Ms4a6d	9.5613e-40	3.10457	0.769	0.254	2.08981e-35	Ushbp1	2.39237e-29	2.55763	0.746	0.28	5.22901e-25	Fitm2	9.59196e-16	1.46358	0.961	0.912	2.09651e-11	2210016F16Rik	9.32307e-07	2.72319	0.27	0.668	0.0203774	Lpl	3.84719e-14	0.995569	1	1	8.40881e-10	Sucla2	4.25774e-26	1.35487	1	0.967	9.30615e-22	2310030G06Rik	1.53872e-12	0.904971	0.673	0.234	3.36318e-08
Plagl1	1.49254e-30	3.74388	0.523	0.121	3.26225e-26	Laptm5	1.68794e-50	3.10102	0.932	0.36	3.68932e-46	Tinagl1	4.65124e-28	2.53677	0.817	0.398	1.01662e-23	Plin5	3.97438e-08	1.46168	0.844	0.716	0.000868679	Kctd20	4.63853e-08	2.71314	0.257	0.706	0.00101384	Mapt	2.32648e-09	0.987746	0.971	0.829	5.085e-05	Vdac1	3.2267e-18	1.35382	1	0.96	7.05259e-14	Mgst3	3.24574e-12	0.894547	1	0.903	7.09421e-08
Pdia4	4.22556e-57	3.73973	0.966	0.48	9.23581e-53	Apoe	2.95139e-28	3.07681	0.952	0.723	6.45086e-24	Rassf9	3.0769e-23	2.50641	0.643	0.255	6.72517e-19	Xirp1	5.48094e-15	1.4614	1	0.984	1.19797e-10	Rnf166	9.19008e-10	2.69273	0.162	0.64	2.00868e-05	Kmt5a	1.55375e-10	0.984395	1	0.948	3.39602e-06	Echs1	2.82061e-22	1.35123	1	0.948	6.165e-18	Gm10053	3.34945e-14	0.88536	0.962	0.529	7.3209e-10
Myl9	3.90029e-48	3.73679	0.765	0.224	8.52486e-44	Coro1a	1.93265e-49	3.07384	0.837	0.292	4.22419e-45	Cldn5	4.18396e-33	2.50598	0.611	0.143	9.14489e-29	Tcea3	9.04867e-14	1.4596	0.987	0.902	1.97777e-09	Prxl2c	7.39705e-09	2.66687	0.257	0.755	0.000161677	Tpm1	5.73029e-17	0.983128	1	1	1.25247e-12	Eef1akmt1	2.43962e-23	1.35079	1	0.51	5.33227e-19	Atp5e	4.53507e-15	0.885294	1	1	9.91231e-11
Spon2	5.22915e-56	3.73507	0.577	0.057	1.14294e-51	Lcp1	1.37035e-48	3.07244	0.946	0.409	2.99517e-44	Cyp2j9	5.79211e-08	2.4889	0.238	0.082	0.00126598	Txlnb	1.95706e-17	1.4593	0.987	0.962	4.27755e-13	Sec23b	2.47677e-08	2.65823	0.135	0.524	0.000541348	Fh1	2.35506e-15	0.982701	1	0.9	5.14746e-11	Adprhl1	3.99415e-21	1.34811	1	0.945	8.73002e-17	Ckmt2	5.59324e-12	0.88525	1	0.968	1.22251e-07
Serpine2	1.61166e-54	3.72985	0.906	0.364	3.5226e-50	F13a1	1.58908e-31	3.06693	0.782	0.321	3.47324e-27	Mmrn2	1.06027e-32	2.48396	0.802	0.268	2.31742e-28	Hspb7	2.11475e-18	1.44838	1	0.974	4.62221e-14	Zscan21	7.26876e-07	2.65787	0.135	0.499	0.0158873	Etfb	1.61181e-17	0.981145	1	0.986	3.52293e-13	Ndufb9	1.89393e-24	1.33533	1	0.99	4.13957e-20	Ndufb10	5.27947e-14	0.877002	1	0.99	1.15393e-09

## Sheet: Table S3
Cluster Green marker genes top 100						Cluster Red marker genes						Cluster Brown marker genes top 100						Cluster Blue marker genes top 100						Cluster Yellow marker genes						Cluster Purple marker genes top 100
gene_name	p_val	avg_log2FC	pct.1	pct.2	p_val_adj	gene_name	p_val	avg_log2FC	pct.1	pct.2	p_val_adj	gene_name	p_val	avg_log2FC	pct.1	pct.2	p_val_adj	gene_name	p_val	avg_log2FC	pct.1	pct.2	p_val_adj	gene_name	p_val	avg_log2FC	pct.1	pct.2	p_val_adj	gene_name	p_val	avg_log2FC	pct.1	pct.2	p_val_adj
mt-Nd1	0	0.613286	1	0.999	0	Nppb	2.83e-287	0.992252	0.97	0.927	9.14e-283	Col1a1	0	3.74892	0.979	0.769	0	Nppa	4.56414e-284	1.9957	0.988	0.974	1.47353e-279	Hbb-bs	3.46754e-298	3.14484	0.996	0.657	1.11949e-293	Tagln	2.52048e-90	1.98053	0.947	0.408	8.13737e-86
Ech1	0	0.612162	0.987	0.962	0	Hspb1	5.24e-151	0.95725	0.963	0.931	1.69e-146	Col1a2	0	3.57628	0.978	0.784	0	Clu	1.26037e-255	1.52469	0.986	0.981	4.06912e-251	Hba-a1	0	2.94075	0.975	0.425	0	Myl9	1.06568e-96	1.95144	0.941	0.424	3.44053e-92
Cox7a1	0	0.590304	0.996	0.986	0	Ankrd1	0	0.838022	0.993	0.976	0	Col3a1	0	3.37381	0.984	0.867	0	S100a9	6.00036e-35	1.39737	0.367	0.262	1.93722e-30	Hba-a2	0	2.82312	0.982	0.504	0	Acta2	1.91348e-82	1.88395	0.984	0.717	6.17767e-78
mt-Co1	0	0.586732	1	1	0	Xirp2	1.81e-157	0.800637	0.883	0.803	5.83e-153	Fn1	0	3.31462	0.982	0.712	0	Myh7	1.30179e-222	1.39676	0.904	0.763	4.20282e-218	Hbb-bt	3.82157e-301	1.97315	0.802	0.235	1.23379e-296	Myh11	1.0897e-200	1.65618	0.893	0.165	3.51808e-196
Acaa2	0	0.558155	0.967	0.919	0	Flnc	1.49e-154	0.755444	0.897	0.82	4.82e-150	Apoe	0	3.17947	0.994	0.93	0	S100a8	2.84474e-37	1.35456	0.362	0.253	9.18424e-33	Alas2	3.28492e-225	0.298975	0.257	0.021	1.06054e-220	Tpm2	2.65336e-67	1.51167	0.877	0.497	8.56638e-63
mt-Co2	0	0.555151	1	1	0	Nmrk2	2.24e-200	0.709951	0.681	0.438	7.24e-196	Postn	0	3.12021	0.945	0.572	0	Timp1	9.60495e-153	1.1356	0.812	0.606	3.10096e-148	mt-Atp8	5.63712e-16	0.28443	0.945	0.92	1.81994e-11	Mustn1	3.83416e-119	1.24757	0.807	0.215	1.23786e-114
Atp2a2	0	0.554086	0.999	0.998	0	Fhl1	9.35e-130	0.709774	0.835	0.737	3.02e-125	Ftl1	0	2.94447	0.98	0.927	0	Ccl6	2.13661e-20	1.11422	0.646	0.592	6.89806e-16	mt-Co1	1.02171e-34	0.26923	1	1	3.2986e-30	Flna	8.18006e-44	1.02984	0.947	0.717	2.64093e-39
Pln	0	0.549781	0.997	0.991	0	Cryab	2.67e-282	0.653375	0.999	0.992	8.61e-278	Lyz2	0	2.84351	0.983	0.886	0	Srgn	1.77432e-43	1.11148	0.748	0.671	5.72839e-39							Crip1	1.67458e-42	0.989688	0.995	0.9	5.40639e-38
Tnni3	0	0.548682	0.998	0.993	0	Lcn2	5.82e-136	0.59303	0.476	0.274	1.88e-131	Bgn	0	2.77077	0.981	0.859	0	Arg1	1.12625e-30	1.04467	0.326	0.225	3.63609e-26							Gsn	2.2311e-32	0.912066	0.995	0.944	7.20311e-28
Cox8b	0	0.543838	0.995	0.983	0	Mt2	3.45e-122	0.590835	0.846	0.725	1.11e-117	Sparc	0	2.70755	0.997	0.952	0	Ccl2	3.15463e-26	0.977868	0.467	0.376	1.01847e-21							Mylk	1.04272e-91	0.909608	0.791	0.256	3.36641e-87
mt-Nd4	0	0.541031	1	0.999	0	Csrp3	2.99e-213	0.559737	0.998	0.987	9.64e-209	Sfrp2	0	2.68607	0.839	0.304	0	Mt2	3.69471e-99	0.976707	0.834	0.75	1.19284e-94							Csrp1	1.66454e-41	0.821904	0.818	0.468	5.37396e-37
mt-Nd4l	0	0.537155	0.985	0.946	0	Hspb7	1.22e-244	0.488297	0.984	0.961	3.93e-240	Spp1	2.07363e-277	2.6328	0.688	0.39	6.69473e-273	Cilp	5.78124e-105	0.952144	0.534	0.338	1.86647e-100							Mgp	3.17678e-26	0.731504	0.995	0.95	1.02562e-21
mt-Nd2	0	0.535728	1	0.999	0	Mt1	5.73e-140	0.485606	0.99	0.975	1.85e-135	Eln	0	2.61128	0.93	0.589	0	Actb	1.61939e-236	0.902166	0.98	0.981	5.22819e-232							Pi16	2.42568e-19	0.696236	0.818	0.602	7.83131e-15
Ckm	0	0.53417	0.992	0.974	0	Uck2	3.42e-120	0.483163	0.654	0.492	1.1e-115	Col5a2	0	2.45938	0.938	0.566	0	Mgp	1.26625e-125	0.896846	0.941	0.952	4.08809e-121							Myl6	7.93198e-28	0.680792	0.984	0.934	2.56084e-23
mt-Co3	0	0.533647	1	1	0	Xirp1	4.22e-141	0.482891	0.821	0.694	1.36e-136	Col5a1	0	2.44348	0.903	0.543	0	Gpx3	1.48387e-90	0.895725	0.828	0.842	4.79068e-86							Dstn	2.81509e-30	0.65023	0.936	0.781	9.08853e-26
Eno3	0	0.519492	0.964	0.903	0	Synpo2l	3.09e-159	0.480182	0.778	0.602	9.98e-155	Mfap4	0	2.43999	0.917	0.453	0	Prg4	4.27539e-46	0.893888	0.456	0.316	1.38031e-41							Col18a1	9.73236e-19	0.647312	0.535	0.285	3.14209e-14
Lpl	0	0.515189	0.995	0.984	0	Tnfrsf12a	6.14e-154	0.451239	0.814	0.684	1.98e-149	C1qb	0	2.37937	0.931	0.73	0	Eef1a1	9.14076e-278	0.855345	0.988	0.974	2.95109e-273							Tm4sf1	2.88435e-11	0.639947	0.882	0.722	9.31212e-07
Hrc	4.4659e-307	0.512389	0.94	0.84	1.44181e-302	Acta1	3.17e-139	0.449499	0.966	0.942	1.02e-134	Cthrc1	0	2.36155	0.733	0.21	0	Pabpc1	1.65012e-79	0.832061	0.784	0.738	5.3274e-75							Igfbp4	7.236e-29	0.638969	0.882	0.657	2.33614e-24
mt-Nd3	0	0.51093	1	0.998	0	Lmcd1	2.28e-64	0.429962	0.66	0.542	7.37e-60	Ctss	0	2.34109	0.807	0.489	0	Actg1	3.93222e-232	0.80908	0.967	0.95	1.26952e-227							Sncg	2.10649e-38	0.633655	0.529	0.215	6.80081e-34
Slc25a4	0	0.501464	0.998	0.996	0	Gm42418	1.03e-27	0.428126	0.912	0.893	3.33e-23	Fstl1	0	2.32649	0.92	0.573	0	Serpine1	2.95368e-86	0.808909	0.692	0.514	9.53595e-82							Bcam	8.9053e-27	0.624588	0.909	0.785	2.87508e-22
mt-Cytb	0	0.500429	1	1	0	Rras2	1.18e-88	0.418865	0.681	0.554	3.8e-84	Mgp	0	2.27123	0.988	0.946	0	Postn	1.49428e-102	0.807096	0.773	0.599	4.82428e-98							Cald1	3.43174e-20	0.608162	0.797	0.587	1.10794e-15
Myl2	0	0.485934	0.999	0.999	0	Nrap	3.26e-152	0.418209	0.89	0.805	1.05e-147	Lgals3	0	2.24982	0.769	0.413	0	Hba-a2	6.93434e-08	0.800431	0.555	0.52	0.00223875							Cytl1	1.22337e-52	0.58275	0.439	0.105	3.94964e-48
Ldhb	0	0.477961	0.984	0.961	0	Rtn4	5.05e-81	0.411674	0.821	0.698	1.63e-76	Tmsb10	0	2.20577	0.974	0.855	0	Cxcl3	2.68524e-57	0.800355	0.21	0.089	8.66928e-53							Ckb	1.09818e-22	0.571385	0.866	0.682	3.54549e-18
Myh6	5.08855e-285	0.476687	0.999	0.999	1.64284e-280	Enah	7.54e-116	0.4034	0.747	0.619	2.43e-111	Igfbp7	0	2.18044	0.989	0.94	0	Mfap5	7.76144e-114	0.795631	0.75	0.625	2.50578e-109							Sema3g	2.55023e-76	0.550329	0.561	0.13	8.23342e-72
Cox6a2	0	0.476357	0.999	0.997	0	1110002E22Rik	2.24e-87	0.392352	0.617	0.462	7.22e-83	Ltbp2	0	2.16667	0.853	0.311	0	Thbs4	2.6314e-66	0.793884	0.465	0.321	8.49547e-62							Ppp1r14a	4.85946e-35	0.550306	0.588	0.258	1.56888e-30
mt-Atp6	0	0.47173	1	1	0	Klhl41	1.04e-89	0.368103	0.665	0.512	3.34e-85	Tyrobp	0	2.15638	0.788	0.549	0	Des	3.38951e-208	0.783597	0.971	0.967	1.0943e-203							Mfge8	2.27671e-19	0.533959	0.914	0.785	7.35036e-15
Etfb	0	0.471545	0.967	0.935	0	Des	8.27e-161	0.358218	0.982	0.961	2.67e-156	Fbn1	0	2.13593	0.931	0.65	0	Tm4sf1	1.88848e-103	0.770986	0.815	0.713	6.09696e-99							Cnn1	4.25865e-62	0.53185	0.529	0.135	1.37491e-57
Gm15543	3.91493e-291	0.468121	0.922	0.815	1.26394e-286	Ehd4	2.59e-136	0.352685	0.884	0.829	8.37e-132	Tmsb4x	0	2.12346	0.994	0.985	0	Pdpn	5.07866e-57	0.764728	0.488	0.325	1.63965e-52							Sparcl1	5.105e-20	0.523115	0.914	0.804	1.64815e-15
Fabp3	0	0.465768	0.999	0.997	0	Rcan1	1e-126	0.346672	0.772	0.648	3.23e-122	C1qa	0	2.11216	0.876	0.662	0	Ccn2	7.32542e-176	0.762999	0.906	0.793	2.36501e-171							Ltbp4	6.46197e-21	0.521939	0.984	0.863	2.08625e-16
Myl3	0	0.458059	0.999	0.999	0	Malat1	7.11e-12	0.34485	0.766	0.737	2.3e-07	C1qc	0	2.11109	0.841	0.596	0	Acta1	1.50525e-104	0.761415	0.951	0.948	4.8597e-100							Mcam	3.01512e-19	0.515305	0.759	0.539	9.73432e-15
Atp5g3	0	0.45801	0.992	0.987	0	Ankrd23	1.51e-135	0.334641	0.919	0.856	4.88e-131	Loxl1	0	2.09627	0.941	0.642	0	Igfbp7	1.65026e-180	0.76115	0.964	0.944	5.32786e-176							Ace	2.82257e-19	0.501274	0.743	0.515	9.11267e-15
Acadm	0	0.455415	0.962	0.913	0	mt-Atp8	1.94e-90	0.318943	0.953	0.908	6.28e-86	Lox	0	2.07672	0.836	0.323	0	Hba-a1	2.63431e-07	0.74956	0.484	0.442	0.00850488							Cfh	7.35816e-15	0.491093	0.845	0.688	2.37558e-10
Ckmt2	0	0.448739	0.993	0.979	0	Hbegf	7.92e-91	0.316657	0.474	0.314	2.56e-86	Ccn5	0	2.02594	0.807	0.311	0	Sprr1a	2.22272e-77	0.743981	0.446	0.268	7.17604e-73							Notch3	3.55283e-33	0.489475	0.77	0.438	1.14703e-28
mt-Nd5	0	0.444483	0.996	0.98	0	Spcs3	1.37e-70	0.293722	0.632	0.508	4.42e-66	Fbln2	0	2.00888	0.903	0.688	0	S100a11	6.53975e-155	0.730114	0.866	0.742	2.11136e-150							Gm13889	3.46534e-17	0.484498	0.61	0.392	1.11879e-12
Idh2	0	0.436386	0.987	0.964	0	S100a9	5.04e-50	0.290819	0.362	0.24	1.63e-45	Ctsb	0	2.00505	0.971	0.953	0	S100a6	1.05022e-150	0.726514	0.93	0.864	3.39062e-146							Crispld2	4.08442e-22	0.474718	0.738	0.475	1.31866e-17
Eci1	0	0.433165	0.896	0.804	0	Lrg1	4.34e-54	0.290716	0.693	0.577	1.4e-49	Serpinh1	0	1.99525	0.96	0.894	0	Vim	5.95925e-156	0.723857	0.924	0.826	1.92394e-151							Cavin3	2.02273e-18	0.464686	0.77	0.568	6.53039e-14
Acsl1	1.68666e-290	0.427713	0.932	0.835	5.44537e-286	Pakap.1	3.35e-66	0.288624	0.754	0.647	1.08e-61	Comp	0	1.9934	0.81	0.26	0	Emp1	4.57368e-159	0.722466	0.821	0.655	1.47661e-154							Itih4	3.70465e-117	0.46326	0.374	0.039	1.19605e-112
Mpc2	0	0.426263	0.966	0.92	0	Clic5	4.29e-114	0.282024	0.795	0.668	1.38e-109	Eef1a1	0	1.98592	0.994	0.973	0	Xirp2	3.53498e-124	0.719791	0.859	0.821	1.14127e-119							Vim	1.78699e-09	0.452345	0.979	0.835	5.76929e-05
Hadha	0	0.423358	0.975	0.94	0	Serpine1	7.45e-45	0.280075	0.627	0.497	2.41e-40	Tagln	0	1.97974	0.742	0.369	0	Ccl7	4.78159e-21	0.713525	0.405	0.32	1.54374e-16							Lamb2	1.3492e-18	0.451129	0.925	0.805	4.35591e-14
Dgat2	7.36507e-278	0.422923	0.871	0.708	2.37781e-273	S100a8	7.03e-60	0.274869	0.363	0.227	2.27e-55	Lum	0	1.95102	0.938	0.678	0	Cxcl5	4.63015e-39	0.711616	0.294	0.178	1.49485e-34							Lmod1	9.32338e-121	0.451067	0.444	0.053	3.01005e-116
Hopx	1.05049e-299	0.420127	0.878	0.718	3.3915e-295	Hsp90aa1	3.36e-69	0.274194	0.843	0.764	1.09e-64	Csrp2	0	1.93953	0.775	0.387	0	Ankrd1	8.08819e-205	0.704812	0.994	0.979	2.61127e-200							Cd200	3.03719e-11	0.447526	0.722	0.55	9.80557e-07
Ndufv3	0	0.417941	0.979	0.962	0	Pdlim5	1.17e-118	0.273805	0.952	0.922	3.78e-114	Vim	0	1.90596	0.946	0.821	0	Hsp90aa1	8.32278e-85	0.697491	0.824	0.782	2.68701e-80							Cldn5	6.2413e-21	0.447426	0.743	0.481	2.015e-16
Ndufa4	0	0.409251	0.996	0.993	0	Fabp4	7.45e-43	0.271167	0.983	0.971	2.41e-38	Serpinf1	0	1.88743	0.869	0.473	0	Hspb1	1.88461e-131	0.693197	0.938	0.94	6.08446e-127							Epas1	5.43416e-18	0.440936	0.898	0.805	1.75442e-13
Chchd10	0	0.405522	0.993	0.977	0	Smpx	2.82e-98	0.25105	0.912	0.851	9.1e-94	Cd74	0	1.87919	0.9	0.725	0	Ptma	2.76161e-178	0.69229	0.906	0.886	8.91586e-174							Ptp4a3	9.65021e-16	0.435868	0.93	0.854	3.11557e-11
Atp5o	0	0.403351	0.992	0.975	0							Thbs2	0	1.85764	0.696	0.244	0	Rtn4	1.7404e-125	0.688581	0.827	0.72	5.61888e-121							Igf2	3.35251e-43	0.429693	0.508	0.162	1.08236e-38
Ndufb10	0	0.401516	0.974	0.941	0							Col8a1	0	1.85726	0.831	0.443	0	Cebpb	1.02867e-67	0.680397	0.815	0.771	3.32105e-63							Igfbp5	1.38248e-16	0.425111	0.701	0.497	4.46333e-12
Mdh1	0	0.399453	0.99	0.972	0							Id3	0	1.85485	0.885	0.689	0	Myl6	5.50642e-246	0.670618	0.957	0.932	1.77775e-241							Pcp4l1	2.73056e-19	0.413213	0.861	0.688	8.81562e-15
Hadh	4.02898e-280	0.398433	0.908	0.831	1.30076e-275							Acta2	0	1.84045	0.852	0.702	0	Col4a1	7.85517e-190	0.669937	0.944	0.92	2.53604e-185							Gja4	5.77362e-24	0.409058	0.535	0.26	1.86401e-19
Rpl3l	1.95902e-271	0.392466	0.803	0.601	6.3247e-267							Timp2	0	1.83002	0.891	0.658	0	Anxa2	3.01568e-118	0.665118	0.832	0.699	9.73612e-114							Ly6a	8.62298e-15	0.404453	0.941	0.848	2.78393e-10
Ndufs6	0	0.391208	0.983	0.958	0							Sfrp1	0	1.81723	0.803	0.312	0	Mif	1.70622e-136	0.660286	0.873	0.874	5.50852e-132							Axl	1.0169e-15	0.401795	0.84	0.633	3.28306e-11
Ndufa5	0	0.38979	0.985	0.959	0							Gpnmb	0	1.81566	0.591	0.114	0	Cfl1	2.93551e-130	0.660108	0.888	0.835	9.4773e-126							Smtn	1.86329e-12	0.390868	0.813	0.685	6.01562e-08
Acadvl	9.49561e-278	0.383533	0.954	0.909	3.06566e-273							Aspn	0	1.78924	0.828	0.41	0	Nppb	2.51436e-197	0.655113	0.97	0.935	8.11762e-193							Ccdc3	1.42979e-136	0.389898	0.417	0.041	4.61606e-132
Hadhb	1.7357e-306	0.381893	0.984	0.959	5.6037e-302							Rcn3	0	1.78853	0.886	0.532	0	Msn	7.17594e-90	0.65484	0.795	0.704	2.31675e-85							Cavin1	1.19163e-14	0.382723	0.909	0.823	3.84718e-10
Atp5g1	0	0.380981	0.996	0.989	0							Rbp1	0	1.78293	0.796	0.416	0	Ccl9	1.6461e-25	0.65046	0.547	0.453	5.31444e-21							Gja5	1.35936e-68	0.378763	0.369	0.061	4.38868e-64
Ndufab1	7.88488e-303	0.38029	0.978	0.95	2.54563e-298							Fcer1g	0	1.76574	0.768	0.509	0	Ier3	3.87318e-80	0.648588	0.68	0.548	1.25046e-75							Timp3	3.13644e-14	0.362955	0.856	0.697	1.0126e-09
Mb	2.84701e-263	0.380243	0.999	0.999	9.19157e-259							Ctsl	0	1.76024	0.929	0.836	0	Fxyd5	3.36158e-125	0.646306	0.781	0.623	1.08529e-120							Dynll2	1.77919e-07	0.355378	0.893	0.843	0.00574413
Cox5a	0	0.379072	0.992	0.982	0							H2-D1	0	1.75843	0.937	0.822	0	Thbs1	2.03744e-106	0.630811	0.694	0.497	6.57788e-102							Serinc3	2.01646e-13	0.354369	0.979	0.901	6.51014e-09
Fhl2	4.23455e-232	0.378387	0.985	0.952	1.36712e-227							S100a6	0	1.75199	0.95	0.861	0	Igfbp3	1.13713e-50	0.626493	0.544	0.404	3.67123e-46							Heg1	2.76138e-12	0.352783	0.77	0.592	8.91512e-08
Etfdh	8.07058e-246	0.376055	0.888	0.796	2.60559e-241							Thbs1	0	1.74847	0.833	0.474	0	Arhgdia	2.86848e-129	0.614803	0.872	0.821	9.26088e-125							Tnxb	3.05788e-13	0.344349	0.615	0.406	9.87238e-09
Cycs	7.12415e-254	0.375174	0.986	0.959	2.30003e-249							Lgals1	0	1.74256	0.97	0.948	0	Rcan1	3.64506e-104	0.611166	0.754	0.673	1.17681e-99							Atp2a3	1.47083e-38	0.34226	0.46	0.143	4.74858e-34
Sdhb	0	0.375074	0.975	0.947	0							Mmp2	0	1.74056	0.904	0.561	0	Tmsb10	2.27985e-189	0.610045	0.948	0.859	7.36048e-185							Ptprb	4.70627e-10	0.340912	0.701	0.544	1.51942e-05
Myoz2	7.17136e-234	0.371083	0.957	0.879	2.31527e-229							Actg1	0	1.73918	0.975	0.949	0	Col15a1	5.25839e-73	0.601067	0.718	0.69	1.69767e-68							Ptgis	5.10636e-09	0.340046	0.663	0.51	0.000164859
Pfkm	1.24189e-217	0.370959	0.938	0.864	4.00946e-213							Npc2	0	1.73664	0.858	0.641	0	AA467197	6.62602e-63	0.600886	0.34	0.178	2.13921e-58							Nrarp	4.1917e-15	0.334383	0.412	0.209	1.35329e-10
Ndufb8	0	0.369669	0.983	0.957	0							Gpx1	0	1.73329	0.916	0.791	0	Arpc1b	3.12453e-96	0.600249	0.774	0.657	1.00875e-91							Podxl	8.82145e-16	0.328699	0.765	0.58	2.848e-11
Ndufc1	0	0.365726	0.986	0.97	0							Col14a1	0	1.7303	0.81	0.294	0	Bgn	3.55471e-161	0.598431	0.921	0.868	1.14764e-156							Tinagl1	1.51987e-10	0.32826	0.658	0.521	4.90691e-06
Ndufb9	0	0.36489	0.984	0.967	0							Mfap5	0	1.70642	0.901	0.602	0	Rpl3	1.63317e-135	0.592609	0.906	0.853	5.27268e-131							Aoc3	2.1774e-22	0.323848	0.524	0.251	7.02972e-18
Mgst3	4.86131e-234	0.363801	0.934	0.868	1.56947e-229							Ms4a7	0	1.69745	0.669	0.23	0	Col5a2	1.41429e-103	0.591881	0.754	0.594	4.56604e-99							Atp2b4	1.64037e-27	0.322221	0.476	0.191	5.29593e-23
Acss1	3.40062e-233	0.363092	0.859	0.711	1.09789e-228							Col16a1	0	1.69376	0.823	0.312	0	Sparc	1.21479e-234	0.590343	0.985	0.954	3.92194e-230							Cox6a1	1.40408e-08	0.322067	0.947	0.871	0.000453306
Uqcrc1	4.00694e-247	0.363023	0.979	0.951	1.29364e-242							Adamts2	0	1.68189	0.846	0.411	0	Malat1	1.41333e-18	0.590205	0.735	0.746	4.56295e-14							Rbpms2	1.29874e-09	0.321483	0.508	0.36	4.19299e-05
Cpt1b	1.69472e-213	0.361147	0.898	0.771	5.47139e-209							Pcolce	0	1.67905	0.905	0.663	0	Eno1	6.53327e-47	0.586599	0.604	0.52	2.10927e-42							Pecam1	1.97104e-08	0.321239	0.802	0.667	0.00063635
Uqcrfs1	9.07389e-282	0.358376	0.978	0.95	2.9295e-277							Lgmn	0	1.67489	0.809	0.607	0	Pfn1	1.06835e-97	0.583659	0.864	0.853	3.44917e-93							Sh3bgrl	3.58307e-11	0.319344	0.679	0.5	1.15679e-06
Atp5a1	2.32815e-290	0.356914	0.996	0.995	7.51644e-286							Fabp5	3.91281e-258	1.66637	0.84	0.709	1.26325e-253	Tspo	5.40297e-87	0.580249	0.761	0.672	1.74435e-82							Actg2	3.89929e-42	0.317805	0.316	0.067	1.25889e-37
Cyc1	5.89744e-287	0.355601	0.982	0.96	1.90399e-282							S100a11	0	1.65331	0.92	0.733	0	H3f3b	1.07937e-100	0.579814	0.854	0.812	3.48475e-96							Rarres2	4.02966e-12	0.317131	0.733	0.542	1.30098e-07
Cox7b	0	0.354787	0.992	0.985	0							B2m	0	1.64846	0.96	0.919	0	Serpinb1a	4.75645e-33	0.579615	0.343	0.243	1.53562e-28							Lrrc32	1.90603e-14	0.3166	0.513	0.306	6.15362e-10
Atp5k	0	0.35428	0.995	0.988	0							Ctsz	0	1.64823	0.872	0.59	0	Tgm2	2.12672e-111	0.576725	0.841	0.82	6.86612e-107							Actb	4.80382e-14	0.314382	1	0.981	1.55091e-09
Decr1	1.47521e-227	0.353895	0.891	0.825	4.76273e-223							Grn	0	1.64413	0.909	0.774	0	Tagln2	1.7995e-117	0.573684	0.836	0.737	5.8097e-113							Igfbp7	3.47357e-13	0.311901	0.995	0.945	1.12144e-08
Fitm1	4.57269e-228	0.353342	0.843	0.689	1.47629e-223							Lrp1	0	1.62726	0.898	0.617	0	Ncl	2.62683e-40	0.565728	0.764	0.728	8.48073e-36							Pls3	1.25609e-09	0.310175	0.706	0.528	4.05527e-05
Mrpl42	8.50133e-235	0.350886	0.937	0.885	2.74465e-230							Myl6	0	1.6272	0.968	0.93	0	Chil3	1.27268e-28	0.564309	0.22	0.131	4.10884e-24							Ppp1r12b	2.58908e-12	0.307079	0.797	0.625	8.35885e-08
Cox5b	0	0.350685	0.995	0.988	0							Rps12	0	1.62438	0.983	0.971	0	Tpm4	1.76333e-80	0.563357	0.786	0.688	5.69292e-76							Marveld1	9.32061e-14	0.307012	0.524	0.311	3.00916e-09
Uqcrq	0	0.349682	0.994	0.99	0							Mpeg1	0	1.6161	0.705	0.299	0	Col4a2	8.27719e-148	0.562692	0.91	0.888	2.67229e-143							Errfi1	5.8628e-14	0.306144	0.69	0.488	1.8928e-09
Aco2	1.63388e-248	0.346046	0.98	0.961	5.27498e-244							Ctsd	0	1.61083	0.976	0.974	0	Rpsa	1.95018e-167	0.560988	0.976	0.974	6.29616e-163							Ddx5	3.37541e-09	0.304486	0.973	0.897	0.000108975
Etfa	4.20452e-233	0.344934	0.937	0.884	1.35743e-228							Crip1	0	1.6083	0.958	0.893	0	Apln	8.96539e-26	0.560386	0.357	0.262	2.89447e-21							Cd9	1.40181e-10	0.302758	0.695	0.519	4.52574e-06
Crat	1.57751e-193	0.344419	0.901	0.825	5.09299e-189							Bst2	0	1.60802	0.774	0.498	0	Mmp2	1.61016e-61	0.559452	0.67	0.595	5.19839e-57							Stmn2	5.20737e-33	0.300522	0.417	0.138	1.6812e-28
Uqcr11	2.14543e-295	0.34275	0.995	0.992	6.92652e-291							Col6a2	0	1.60717	0.899	0.636	0	Eif4a1	9.34632e-83	0.554477	0.853	0.83	3.01746e-78							Id1	1.75262e-09	0.300271	0.749	0.628	5.65832e-05
Ndufa9	6.05883e-207	0.33822	0.928	0.879	1.95609e-202							Ecm1	0	1.60008	0.902	0.56	0	Tpm3	1.16097e-71	0.550902	0.686	0.553	3.74819e-67							Ehd2	8.9786e-10	0.299382	0.733	0.619	2.89874e-05
Asb2	4.0435e-190	0.338161	0.906	0.787	1.30544e-185							Ccdc80	0	1.59735	0.882	0.603	0	Rpl12	1.43921e-94	0.549748	0.932	0.93	4.6465e-90							Abca8a	1.54713e-10	0.297596	0.631	0.458	4.99491e-06
Atp5j	0	0.334791	0.993	0.981	0							Aebp1	0	1.58766	0.812	0.375	0	Flnc	4.20554e-93	0.548445	0.851	0.84	1.35776e-88							Pkd1	2.71391e-12	0.296264	0.722	0.513	8.76187e-08
Ndufb5	1.01081e-282	0.334693	0.976	0.952	3.26341e-278							H2-Ab1	0	1.58109	0.841	0.573	0	Rps12	2.19489e-119	0.54838	0.974	0.972	7.08621e-115							Wfdc1	6.30677e-17	0.295748	0.449	0.224	2.03614e-12
Got1	2.00822e-206	0.332953	0.947	0.903	6.48353e-202							Sh3bgrl3	0	1.5793	0.872	0.683	0	Mmp9	1.05883e-51	0.546898	0.24	0.115	3.41843e-47							Pmp22	2.97045e-12	0.289329	0.802	0.637	9.59009e-08
Atp5f1	0	0.331743	0.985	0.966	0							Igfbp4	0	1.57617	0.88	0.629	0	Btg1	4.6439e-61	0.544962	0.595	0.431	1.49928e-56							Myom1	4.62253e-08	0.286434	0.936	0.863	0.00149238
Ndufv2	1.9561e-228	0.331341	0.959	0.924	6.31526e-224							Rps20	0	1.57506	0.985	0.978	0	Cd44	3.71351e-58	0.543667	0.513	0.343	1.19891e-53							Mrvi1	8.88074e-41	0.283389	0.428	0.122	2.86715e-36
Atp5j2	0	0.33115	0.996	0.992	0							H2-Eb1	0	1.57432	0.792	0.474	0	Ctla2a	1.86231e-56	0.540791	0.709	0.609	6.01246e-52							Lama5	2.74669e-11	0.282728	0.679	0.513	8.86767e-07
Ndufa3	0	0.331103	0.987	0.969	0							Ifi27l2a	0	1.57319	0.883	0.721	0	Il1b	2.13155e-67	0.539	0.3	0.142	6.88171e-63							Flt1	1.59124e-12	0.282313	0.738	0.548	5.13731e-08
Cox6c	0	0.330233	0.998	0.994	0							Bmp1	0	1.56547	0.86	0.455	0	Tnc	5.99896e-87	0.538773	0.525	0.311	1.93676e-82							Actn1	4.10935e-07	0.27825	0.636	0.487	0.013267
Atp5c1	0	0.328749	0.984	0.968	0							Fbln5	0	1.55432	0.725	0.329	0	Basp1	4.49669e-68	0.533396	0.42	0.233	1.45176e-63							S1pr3	1.12587e-13	0.276783	0.513	0.306	3.63489e-09
Uqcrb	5.03692e-206	0.324269	0.985	0.967	1.62617e-201							Ptn	0	1.55421	0.688	0.156	0	Tuba1c	8.90753e-61	0.532269	0.712	0.592	2.87579e-56							Cenpb	1.32398e-10	0.276075	0.834	0.698	4.27446e-06
Cox7c	1.274e-281	0.323503	0.996	0.99	4.11309e-277							H2-Aa	0	1.54395	0.808	0.53	0	Inhba	9.13557e-68	0.527472	0.287	0.132	2.94942e-63							Ppp1r12c	5.12808e-13	0.27553	0.679	0.492	1.6556e-08
Ndufa10	6.83209e-188	0.31962	0.952	0.91	2.20574e-183							Ccl8	0	1.54349	0.617	0.237	0	Tgfbi	2.04701e-52	0.527353	0.564	0.406	6.60876e-48							Calm2	8.26835e-08	0.274353	0.845	0.738	0.00266944
Ndufb11	1.67408e-260	0.319014	0.971	0.935	5.40477e-256							Ppib	0	1.53695	0.901	0.764	0	Cd74	3.59246e-87	0.524507	0.809	0.738	1.15983e-82							Mmrn2	1.47815e-07	0.274288	0.545	0.409	0.00477222
Sod2	6.27031e-205	0.318639	0.957	0.922	2.02437e-200							Fmod	0	1.53338	0.679	0.152	0	Gm12840	2.33311e-64	0.518284	0.239	0.104	7.53246e-60							Ly6c1	1.45002e-07	0.273226	0.882	0.846	0.00468138

## Sheet: Table S4
M1	M2	M3	M4	M5	M6	M7	M8	M9
Eef1a1	Atp2a2	Ccl6	Brwd3	Spidr	2010001A14Rik	Irak3	Cryab	Ttll5
Tmsb4x	Mb	S100a9	Rtn4r	Iqgap3	Col4a4	Gabpb1	Hspb1	Slc22a23
Rps12	Cox6a2	S100a8	Zfp90	Ganc	Ncapd2	Nrip1	Nppb	Rbm4b
Rplp1	Slc25a4	Actb	Rbm47	Sgsm3	Setdb1	Eml3	Csrp3	Icosl
Rpl41	Myl3	Gm42418	Tafa5	Trmu	Pogk	Ifi211	Ankrd1	Tubgcp4
Rps20	Myh6	Arg1	Wnt5a	Itpr3	Zbed3	Pithd1	Xirp2	Pamr1
Rpl39	Tnni3	Srgn	Tatdn3	Src	Pias3	Rgs16	Flnc	Ccdc73
Tmsb10	Myl2	Ccl2	Ttc23	B4galt4	Zscan26	Ift27	Fhl1	Wbp4
Fau	Pln	Basp1	Pcdh18	Tmem97	Fkbp14	Eps8	Mt1	Gnl1
Fn1	Fabp3	Ccl9	Zfp52	Prpf40b	Neurl3	Taf1b	Uck2	Jmy
Lgals1	Tpm1	Cxcl3	Map11	Kctd3	Ednra	Mfsd14a	Nmrk2	Ndst1
Sparc	Cox4i1	Mmp9	Ifitm10	Map3k10	Cnot10	Wdr20	Mt2	Cyth2
Rpl13	Ckmt2	Cxcl2	Izumo4	Bhlhb9	Uhmk1	Las1l	Hspb7	Sp3
Bgn	Cox7a1	Itgam	Tmem104	Kif2a	Ccn4	Nup153	Des	Srf
Rps27a	Atp5a1	AA467197	Med20	Rilpl2	Dhx40	Sfswap	Enah	Pafah1b2
Rps21	Ckm	Il1r2	Gemin5	Usp39	Fgfr1op	Strip1	Rras2	Nupr1
Col1a2	Ndufa4	Cebpb	Tbk1	Vipas39	Senp3	Dnajc2	Xirp1	Mavs
Rpl34	Lpl	Lcp1	Sde2	Mgmt	Ldlrap1	Mrps10	Tnfrsf12a	Gga1
Apoe	Atp5g3	Pabpc1	Dock8	Stbd1	Sec16a	Poldip3	Synpo2l	Aph1a
Rps16	Uqcrq	Ccr1	Fam20a	Kat5	Cldnd1	Tsnax	Hbegf	Crispld2
Rpl13a	Atp5b	Btg1	Kat14	Traf3	Idnk	Kank3	Lmcd1	Yif1a
Rpl32	Ldhb	Il1b	Pik3c2a	Cks1b	Elf2	Timm29	Nrap	Dnajb4
Col1a1	Cox8b	Ccl7	Sco1	Rprd1b	Rnf4	Asna1	1110002E22Rik	Il11ra1
Rps27	Uqcr11	Chil3	Ltc4s	Dolk	Srebf1	Sdhaf2	Rtn4	Polr2i
Lyz2	Tnnt2	Slfn2	Dedd2	Atp8b2	Tm9sf4	Tial1	Ankrd2	Slc9a3r2
Rps24	Atp5j2	Csf3r	Camsap1	Poglut2	Eapp	Akt1s1	Lcn2	Syngr2
Rpl17	Atp5o	Slfn1	St3gal2	Fam3a	Ext2	Adprh	Spcs3	Capza2
Rps8	mt-Co3	Actg1	Cad	Fcgr4	Slc25a36	Zmiz1	Klhl41	Prkaca
C1qb	Cox5b	Cd24a	Taf6	Ggh	Tppp3	Tcim	Serpine1	Timm17a
Col3a1	mt-Cytb	Mt2	Fmr1	Unc5b	Snhg1	Ncl	Ehd4	Serinc1
Tyrobp	Chchd10	Cd44	Dab2	Sf3b4	Atp6v0e	Cavin4	Pakap.1	Emp3
Rps7	Idh2	Malat1	Ncbp1	Glt8d1	Aff4	Sec13	Rcan1	Ppp1r14b
Serpinh1	Atp5g1	Eno1	Deaf1	Srp68	Dvl3	Pafah1b1	Hsp90aa1	Tsc22d3
Ftl1	Mdh1	Plaur	Casd1	Gm16286	Smc6	Ywhab	Ier3	Trim54
Rps23	Atp5e	Tgfbi	Cdh11	Msrb2	Klhl9	Rbm39	Clic4	Mrfap1
S100a6	Eno3	Lars2	Klc2	Wbp1l	1110065P20Rik	Dnaja1	Ube2d3	Txlnb
Rps15a	Ndufs6	Plek	Socs5	Eid1	Fkbp2	Hint1	Ankrd23	Tmem256
Rps4x	Cox6c	Cd300lf	Fam20b	Dmd	Msantd4	Gaa	Slc38a2	Slc25a5
Rpl18a	Mdh2	Lilrb4a	Mtg2	Top2b	Phf5a	Tmem59	Clic5	Vegfb
Rps9	Ndufv3	Ier3	Clk3	Pcdh7	Ak2	Il1rn	Malat1	Mrpl33
Tpt1	mt-Nd1	Pfn1	Phf11d	Fndc3b	Pdgfrl	Pomp	Msn
C1qa	Uqcrc1	Pdpn	2410004B18Rik	Dnajc5	Ccpg1	Ssr4	mt-Atp8
Igfbp7	Tnnc1	Pim1	Jmjd1c	Gna11	1110004F10Rik	Ctnna1
Ppia	Ech1	Thbs1	Lifr	Hsd17b4	Med25
Rpl35a	Cox5a	Slc16a3	Rnf5	Mcur1	Rnps1
Rps10	Actc1	Hsp90aa1	Nktr	Npepl1	Rad23a
Rpl23	Hrc	H3f3b	Atrx	Col5a3	Usp47
Rpl27a	Etfb	S100a4	Ranbp2	Gps1	Fuom
Rpl37a	Ndufb10	Cd14	Il1r1	Mlec	Tbrg1
Rps26	Cyc1	Ncf1	Mtmr6	Slc44a2	Plin2
Rps28	Hadha	Gm12840	Sh3bp5	Sdf2	Maged2
Rpl37	Acaa2	Tpm3	Tra2a	Fscn1	Spag9
Rpl28	Pgam2	Gsr	Cfdp1	Tsc2	Errfi1
Rpl11	mt-Atp6	Msn	Vps13d	Cisd2	Golga4
Gpx1	Cox7b	Fxyd5	Spi1	Crtap
Fstl1	Ndufc1	Nfkbia	2510039O18Rik	Wfs1
Rpl15	mt-Nd4	Clec4n	Tmem33	H13
Ctsb	Ldb3	Mif	Pum1	Smim14
Rpl38	Mybpc3	Clec4d	Cdc37l1	Srsf6
Rpsa	Ndufa5	Cfl1	P3h1	Slc35f5
Postn	Hadhb	Coro1a	Gm31659
Rpl12	mt-Co1	Pf4	Vps4a
Rplp0	Crip2	Lilr4b	Ube3a
Rps3	Eef1a2	Ifitm1	Prkaa2
Fbln2	Map1lc3a	F10	Ssrp1
Rpl21	Ndufb8	Clec5a	Dram2
S100a11	Fhl2	Il1rn
Actg1	Atp5d	Cd53
Myl6	Atp5j	Csf2rb
Rps19	mt-Nd3	Gda
Rps11	Atp5h	Cotl1
Cd63	Atp5k	Bcl2a1b
Rpl10	Tcap	Arpc1b
Rps29	Ogdh	Serpine1
B2m	Uqcr10	Mxd1
Ctsd	Sdhb	Fcgr3
Col5a1	Pfkm	Ccr2
H2-D1	Uqcrh	Fcgr2b
Rack1	Atp5c1	Hilpda
Npc2	Slc25a3	Cxcl5
Rpl9	Got1	Slfn4
Id3	Uqcrfs1	Sell
Rps3a1	Actn2	Plin2
Sh3bgrl3	Aco2	Capg
Rpl19	Ndufs2	Hmox1
Fcer1g	Ndufb7	Rbms1
Rpl18	Ndufs7	Pgk1
Rpl10a	Cd36	Eif4a1
Lgmn	Ndufb5	Timp1
Ms4a7	Pdha1	Arpc5
Rpl30	Cox7a2	Arhgdia
Loxl1	Atp5l	Msr1
Cthrc1	mt-Co2	Adam8
Csrp2	Pygm	Inhba
Ctss	Ndufv1
Ppib	Obscn
Rpl7	Ndufa13
Rps5	Acsl1
Rpl22	Atp5f1
Rpl36a	Tuba4a
Ifitm3	Acadvl
Rpl8	Ndufb2
Lox	Ndufab1
Rpl14	Ndufa3
Ctsz	Myoz2
Rpl29	Ndufb9
Dynll1	mt-Nd2
Rpl26	Ndrg2
Rps18	Atp5mpl
Mpeg1	Oxct1
Crip1	S100a1
Arpc1b	Ndufa11
Rplp2	Asb2
Cfl1	Coq8a
Fbn1	Sdha
Rps15	Mpc2
Trem2	Casq2
Rps14	Pdhb
Rpl3	Cycs
Col8a1	Ndufa2
Serf2	Ndufa12
Mfap4	Ndufb11
Rbp1	Cox7c
Timp2	Gm15543
Rps2	Acadm
Ubb	Got2
Ccn5	Cox6b1
Cyba	Cpt1b
Rpl31	Cs
Psap	Ndufa9
Rpl7a	Sod2
Sec61b	Acot13
Tagln	Mgst3
Grn	Ivns1abp
Cd52	Ndufv2
P4hb	Atp5md
Col5a2	Acadl
Cd74	Srl
Vim	Ndufa6
Cst3	Hspb6
Sdc3	Fbxl22
Pcolce	Slc2a4
Itm2b	Uqcrc2
Rpl5	Tmem38a
Aebp1	Aldoa
Serpinf1	Ak1
Eef1b2	Ndufs8
Emilin1	Sucla2
Lrp1	Coq9
Rps13	Phyh
Dap	Dgat2
Rpl4	Echs1
Sfrp2	Rpl3l
Loxl3	Nipsnap2
Rpl24	Crat
Tspo	Itgb1bp2
Bst2	Ttn
Ifi27l2a	Eci1
Sfrp1	Myom1
Hexa	Ndufa1
Rpl6	Atp1a2
Thbs2	Kcnk3
Lgals3	Tecr
Cxcl16	Pnpla2
Mgp	Mrpl42
Rpl23a	Dsp
Rps6	Fndc5
H2-K1	Slc25a11
Prelid1	Adprhl1
Fth1	Gatd3a
Gabarap	Ndufa8
Ifitm2	Acss1
Rcn3	mt-Nd4l
Ctsh	Fitm1
H2-Eb1	Ndufs5
Akr1a1	Bckdha
Col14a1	Pde4dip
Anxa1	Mcrip2
Cd68	Etfdh
Cstb	Pdk2
Dcn	Ndufs3
C1qc	Dynll2
Ctsl	Idh3a
Tubb5	Suclg1
Efemp2	Hadh
Aspn	Decr1
Acta2	Uqcrb
Emp1	Idh3b
Sec61g	Cpt2
Actb	Hopx
H2-Ab1	Etfa
Adamts2	Doc2g
Rpl35	Ank1
Ccdc80	Dlat
Tagln2	Macrod1
Ly6e	Mpc1
H2-Aa	Myom2
Ptma	Smyd1
Flna	Ndufs4
Fndc1	Ryr2
Lum	Ndufa10
Lgals3bp	Trdn
Itgb5	Tuba8
Ecrg4	Acads
Col16a1	Hjv
Marcks	Mtfp1
Unc93b1	Ndufb6
Calr	Art3
Mfap5	Plin5
Atox1	Gsn
Rpl36	Pink1
Mxra8	Sdhc
Laptm5	Aqp1
Ost4	Ephx2
Clic1	Asb11
Rpl27	Acat1
Cd300c2	Mfn2
Gas5	Fh1
Ctsa	Gpc1
Selenop	Cisd1
Tmed3	Ndufb4
Lsp1	mt-Nd5
Tpm4	Ccng1
Pfn1	Slc4a3
Thbs1	Mlf1
Snhg18	Vegfb
Fcrls	Pygb
Wfdc17	Tufm
Ptms	Nexn
Tuba1a
Pdia6
Fbln5
Fabp5
Col6a1
Ucp2
Ly86
Lst1
Txndc5
Pmepa1
Serping1
Srpx2
Ifi30
Tgfb3
Ccn2
Vkorc1
C3ar1
Hexb
2410006H16Rik
Col4a1
Rps25
Cebpd
App
Gpnmb
C1qtnf6
Ltbp3
P3h3
Sod3
Col6a2
Fcgr3
Clta
Bmp1
Cnn2
Igfbp4
S100a10
Fxyd5
Selenof
Anxa5
Emp3
Ecm1
Fmod
Olfml3
Csf1r
Lamp1
Serpine2
Dpt
Rgs10
Gusb
Ddah1
Snrpg
Ogn
Ssr2
Comp
Sirpa
Arf4
Ppic
Ccl8
Pld3
Rpl22l1
H2afz
Mmp14
Ms4a6d
Itm2c
Mdk
Ptn
Ssr4
Ptpn18
Sdcbp
Kdelr2
Selenow
H3f3b
Fkbp10
Fxyd6
Cavin3
Cd72
Selenom
Csrp1
Ctsc
Mmp23
H3f3a
Pabpc1
Erp29
Rrbp1
Gnai2
Cemip
Shisa5
Tmem176b
Prdx1
Eef2
Igf1
Cdc42
Col4a2
Myl9
Eva1b
Gpx3
Gm10076
Tpm2
Anxa2
Eef1g
S100a4
Gnb2
Pdia3
Adgre1
Frzb
Itgb1
Stab1
Mfge8
Rnase4
Col6a3
Angptl4
Phlda3
Clec11a
Plod3
Pltp
Myl12b
H2-T23
Loxl2
Cotl1
Rcn1
Tpm3
Ctsk
Ckap4
Atp6v0c
Ltbp2
Actn1
Plin2
Sat1
Col18a1
Glipr1
Capg
Lgals9
Crlf1
Arpc5
Rpl36al
Plac8
Spp1
Aprt
Alox5ap
Rflnb
Kdelr3
Pnp
Rps17
Txn1
Maged1
Gnas
Irf7
Pla2g7
Clec12a
Gnb1
Lipa
Atp6v0e
Rhoc
Arpc2
Olfml2b
Sdc1
Ddost
Spi1
Gpx7
Prdx4
Arhgdia
Ergic3
Lcp1
Tmem176a
Sec61a1
Itgbl1
Tceal9
Litaf
Pdgfrl
Limd2
Maged2
Psmb8
Rps27l
Rnh1
Calu
Tmem119
Man2b1
Pdlim2
Tmem106a
Tma7
Serp1
Cyb5r3
Eif3f
Npdc1
Cybb
Fkbp9
Eif5a
Cd9
Gas6
Cdk4
Isg15
Mfap2
Zyx
Rac1
Cnn3
Rpn2
Chpf
Sh3bgrl
Cxcl12
Tuba1b
Iqgap1
Lamp2
Npm1
Timp1
Crtap
Tnc
Enpp1
Fcgr1
Surf4
Btf3
Cnpy2
Itga11
Tmed9
Actr3
Tgfbi
Nid1
Mrpl52
Cmtm7
Hsp90b1
Mxra7
Gm47283
Serpinb6a
H19
Dpysl3
Ms4a6c
Lhfp
Ccn1
Morf4l2
Pea15a
Eno1
Nucb1
Ppp1r18
Pirb
Ptgis
Arpc3
Gask1b
Arpc4
Stt3a
P3h1
Tmem50a
Msn
Lmna
Tmem167
Praf2
Islr
Myh9
Gng5
Ostc
Oaf
Calm1
Pls3
Picalm
Antxr1
Nedd4
Plxdc2
Bola2
Tmem45a
Krtcap2
Nsa2
Tnfrsf1a
Gdi2
Rap1b
Colgalt1
Anxa3
Ddb1
Gltp
Cd300a
Arhgdib
P4ha3
Serf1
Cald1
Pfdn5
Ywhaq
Itm2a
C1qtnf3
Rbm3
Mif
Dok1
Cndp2
Col12a1
Sdf4
Anpep
Marcksl1
Rab31
Gpx8
Tspan4
Aif1
Pf4
Oasl2
Mmp2
Ostf1
Serpina3n
Tspan6
Ap3s1
Cd53
Col11a1
Dad1
Actn4
Fzd2
Tm4sf1
Cd276
Rpn1
Lamb1
Cox6a1
Kif26b
Cyth4
H2afj
Serpina3g
Fcgr2b
Eif4a1
Elob
Cd48
Pdgfrb
Phf11b
Cd302
Cttn
Pold4
Rnf213
Cilp
Lrrc17
Ap2m1
Gadd45b
Sri
Zfp36l2
Lat2
Rac2
Gm2a
Mafb
Gns
Fat1
Tns3
Ilk
Tmed10
Pdia5
Ywhah
Tgfbr2
Tnfaip8l2
Glmp
Copz2
Cox8a
Coro1a
Fuca1
Lama4
Adam9
Col8a2
Wfdc18
Rhoa
Arap1
Tm9sf3
Gng2
Ddit4l
Zbp1
Plxnb2
Hspa8
Tln1
Oaz1
Rab7b
Nckap1l
Trf
Capn2
Edem1
Tcirg1
Lair1
Adam8
Tapbp
Scpep1
Tpd52
Psmd8
Gpr176
Ptbp1
Kdelr1
Id2
Ms4a6b
Ypel3
Lamc1
Eif3k
Gpsm3
Prcp
H2-T22
Necap2
Lhfpl2
Fam129b
Isg20
Scarf2
Ndufa4l2
Col15a1
Runx1
P2ry6
Serinc3
Leprot
Rab34
Ube2l6
Gngt2
Txndc17
Acp5
Eln
Arhgef25
Vat1
Selplg
Sprr1a
Pik3ap1
Hspg2
Fkbp11
Gng10
Axl
Pla2g15
Cercam
Ifi27
Esyt1
Vasn
Ctdsp2
Hmgn1
Ada
Gxylt2
AI506816
Metrnl
Ifi204
Myof
Nek6
Fkbp7
Ext1
Plvap
Bcl2a1b
Psmb9
Rab5c
1110038B12Rik
Slc38a10
Cmtm3
Plp2
Evi2a
Pofut2
Myo1f
Cyp1b1
Stat1
Hnrnpk
Anxa4
Tubb2a
Vcam1
Mfsd1
Dkk3
Ccl12
Fibin
Fam114a1
Fgfr1
Ppp1r14b
Vamp8
Dpm3
Dbn1
Tgfb1i1
Synpo
Svbp
44450
Nme1
H13
Mydgf
M6pr
Hvcn1
Bax
P2rx4
Timp3
Os9
Nnmt
Snai1
Snx5
Brk1
Psme2
Arrb2
Atp6v0b
Chpf2
Rras
Ube2s
Tram1
Blvrb
Naca
Sf3b5
Nap1l1
Clec4a3
Selenon
Ftl1-ps1
Lrrc59
Tap1
Sertad4
Fgfrl1
Asah1
Eif3h
Pycard
Atp6v1f
Tmed2
Sem1
9530068E07Rik
Rtp4
2310022B05Rik
Snhg8
Abhd12
Snx3
Itgb2
Fcgr4
Mtpn
Sgpl1
Hnrnpab
Lasp1
Ssc5d
Prelp
Vmp1
Coro1c
Ssr1
Mdfic
Serpinb1a
Slamf9
Spcs1
Tceal8
Cfp
Cd248
Abracl
Taf10
Angptl2
Elovl1
Adamtsl2
Ccn4
Clec4a2
Bicc1
Arl6ip1
Psmb1
B4galt5
Sulf2
Ms4a4c
Ssr3
Nt5c
Fkbp1a
Junb
Ckb
Dstn
AC149090.1
Matn2
Otulinl
Cap1
Arhgap45
Kcnj15
S100a13
Dhrs3
Adamtsl3
Nedd8
Crlf2
Il10ra
Mob1a
Ganab
Ap2s1
Ly9
Arl11
Glipr2
Myo7a
Heg1
Pcbp2
Actg2
Tnfrsf1b
Trim47
Vsir
Epb41l2
Ifit3
Cebpa
Copg1
Pigs
Cpxm1
Ptprs
Ddah2
Actr2
Sec11a
Thbs4
Irgm1
Nrep
Rab3il1
Irf5
Atp6v1a
Zfp36l1
Adamts10
Cd47
Akr1b8
Capza1
Uap1l1
Adamts12
Glb1
Fscn1
Parva
Tkt
Tbrg1
Gpr153
Tnfsf13
Tor3a
Slfn2
Ift20
Galnt16
Clptm1l
Capzb
Ap1s1
Mapk3
Ahnak2
Fermt3
Taldo1
Vasp
Tmbim6
AI413582
Rtn4
Mxd4
Snrpf
Hnrnpf
Eng
Eif1
Nrros
Adam15
Manf
Ran
Ptprc
Ncf2
Xbp1
Cd300ld
Adam12
Sar1a
Il4ra
Hck
Mcl1
Thy1
Dclk1
Fam89b
Man2a1
Cebpb
Lilr4b
Hsp90ab1
Rab8b
Basp1
Kcne4
Ywhab
Ywhaz
Zfas1
Sh3pxd2b
Oas3
Abca1
Clec4a1
Samhd1
F2r
Gba
Tyms
Socs3
Tubb6
Gnai3
Tax1bp3
Hnrnpa3
Pgd
Ly6a
Itpripl2
Vav1
Plod2
Slc39a1
Matn4
Snx1
Hnrnpa1
Stat2
Anp32b
C3
Creb3l1
Polr1d
Dact3
Prkcd
Srpx
Wls
Arl1
Atp6v0d1
Kctd12
Adcy7
Ubl5
Sec24d
Prr13
Hmox1
Piezo1
Ptpn1
Mrc1
Tmem123
Ltbp4
Arsi
Plscr3
Tor2a
Efhd2
Meox1
Cd200
Sox9
Eif4e2
Gpr137b
Ier5l
Lxn
Calm2
Soat1
Myadm
Mest
Ski
Ass1
Rnpep
Prss23
Mcfd2
Unc5b
Pdlim7
Dnaja1
Hif1a
Nucb2
Nupr1
Cd84
Cers2
Eif4b
Ppt1
Selenoh
Ssbp4
Hpgds
Slc15a3
Serpine1
Hcls1
Tbca
Bin1
Ifnar2
Kcnn4
Swi5
Esd
Grina
Scx
Prex1
Xaf1
Pitpna
Mndal
Mprip

## Sheet: Table S5
	ME1	ME2	ME3	ME4	ME5	ME6	ME7	ME8	ME9
Sox17	0.0480163	-0.0478061	0.04883	0.0120197	0.00974002	0.00718567	0.0078603	0.0431934	0.00211333
Mrpl15	-0.0423128	0.0440104	0.0189199	-0.00502894	-0.00831361	-0.00100514	-0.00984311	0.0165855	-0.00491122
Lypla1	0.0411706	-0.0171542	0.0690446	0.00375374	0.00587736	0.00876355	0.00335457	0.00109559	0.00311712
Tcea1	0.184977	-0.203792	0.167217	0.0230662	0.0253526	0.0303128	0.0244036	0.0919872	0.0136155
Atp6v1h	0.130157	-0.141212	0.122587	0.0208076	0.0220467	0.0186435	0.0160193	0.0861523	0.00820433
Rb1cc1	0.0441531	-0.0519568	0.084932	0.00822541	0.00768531	0.0044855	0.00569695	0.0531367	0.000802481
Pcmtd1	0.0215018	0.00778277	-0.011894	0.00825498	0.00771038	0.00438866	-0.00192603	-0.0406678	0.00294224
Rrs1	0.0437957	-0.0583861	0.112719	0.00406105	0.00597299	0.00996982	0.00701727	0.0771868	0.003364
Adhfe1	-0.130525	0.178948	-0.0587282	-0.0166895	-0.0115064	-0.0119924	-0.0145427	-0.0641891	-0.0067361
2610203C22Rik	0.0334899	-0.0338001	0.0170395	0.00287537	0.00148191	9.61752e-05	0.00362598	0.00209084	0.00119952
Vcpip1	0.107985	-0.0876623	0.0859328	0.0175426	0.0163468	0.0222269	0.0100926	0.0204102	0.0102548
Sgk3	0.114776	-0.0987754	0.0921353	0.0155124	0.0129145	0.015102	0.0132314	0.00132909	0.00612306
Snhg6	0.195293	-0.185219	0.0941647	0.025935	0.0259869	0.0287528	0.0236507	0.100314	0.0168712
Cops5	0.061208	-0.0422141	0.046828	0.00776413	0.00189301	0.0114569	0.00508597	0.0105978	-0.00120896
Cspp1	0.0270054	0.0207202	-0.0105085	0.00850134	0.00926614	0.00907682	0.00287095	-0.0377369	0.00646598
Arfgef1	0.0344314	-0.0237141	0.0533627	0.00238673	0.00356198	0.00233139	0.00278397	0.0165604	0.00283787
Prex2	0.0245261	-0.022315	0.0124891	0.00330613	0.00600811	0.00328581	0.00217225	-0.00231771	-0.00107888
Sulf1	0.294837	-0.215533	0.0255454	0.0416111	0.0505322	0.0446973	0.0259817	-0.0492568	0.0316786
Slco5a1	-0.0365499	0.0459797	-0.0173447	-0.00369447	-0.00666805	-0.00432001	0.000605626	-0.00540295	-0.00294165
Ncoa2	0.00198137	0.0265594	0.0100404	0.00517873	-0.0025735	-0.00170814	-0.0022372	-0.020372	0.0041836
Tram1	0.348424	-0.322338	0.200115	0.0442038	0.0448957	0.0459048	0.0397008	0.0544938	0.0229156
Lactb2	0.008257	-0.0129656	0.0344032	0.00225351	-0.00178223	0.00086677	0.00118245	0.0353494	-0.00104561
Msc	0.159118	-0.122122	0.00572685	0.0149786	0.0209285	0.0224885	0.015979	-0.0202623	0.0241647
Terf1	0.0968965	-0.0844594	0.0500739	0.00801875	0.00872539	0.0127197	0.0118146	-0.000827624	0.00564677
Rpl7	0.734911	-0.67365	0.25811	0.0697447	0.182336	0.185369	0.0591535	0.0743954	0.0406289
Rdh10	0.0914649	-0.152847	0.284373	0.0188246	0.013418	0.023305	0.021899	0.149082	0.00509433
Stau2	-0.0782648	0.0961855	-0.0521372	-0.0126577	-0.0105158	-0.0143957	-0.0102649	-0.0335352	-0.00772098
Ube2w	0.144443	-0.130744	0.0716796	0.0169923	0.0185917	0.01632	0.0145411	0.0174125	0.0104082
Eloc	0.128469	-0.125502	0.0626951	0.00734993	0.00783583	0.0113843	0.00954516	0.0476658	0.00361887
Tmem70	-0.0837713	0.117672	-0.0688053	-0.0148365	-0.0162461	-0.0118479	-0.00727261	-0.0587314	-0.00692464
Ly96	0.13513	-0.118326	0.0668557	0.0133908	0.0127881	0.0159397	0.0144033	0.0100019	0.00529368
Jph1	-0.0485072	0.0472749	-0.0161386	-0.00544625	-0.0079103	-0.00908132	-0.00565881	0.0296218	-0.0067219
Pi15	0.141226	-0.148113	0.113958	0.0241366	0.0162172	0.0242743	0.0227317	0.0487079	0.0118607
Mcm3	0.189137	-0.190488	0.100658	0.0250483	0.0250604	0.0223328	0.0187327	0.0318318	0.0134605
Tram2	0.175331	-0.145034	0.0610101	0.0230332	0.0175902	0.0309081	0.0175528	0.00392971	0.0205749
Tmem14a	0.0250252	-0.000574597	-0.0115041	0.00526454	0.00592323	0.00456479	0.00179345	-0.0401356	0.00148018
Gsta3	-0.0284451	0.0377195	0.0128525	-0.000119527	-0.00126858	-0.00524324	-0.000407943	-0.0195478	-0.00397997
Ogfrl1	0.0522557	-0.0685409	0.128372	0.00722261	0.00205556	0.00944706	0.011312	0.0486108	-0.00124833
Smap1	0.195244	-0.174055	0.111066	0.0220456	0.0231369	0.0413523	0.0186724	0.0266382	0.0193499
Sdhaf4	-0.0332629	0.0822452	-0.0764602	0.302099	-0.00877753	-0.012518	-0.00712597	-0.092165	-0.00617484
Fam135a	0.00751108	0.0135845	-0.019415	0.00590264	0.000675323	0.00519585	0.000647791	-0.00996187	0.00269287
Lmbrd1	0.0666652	-0.0466329	0.0572423	0.00935671	0.00996341	0.00767293	0.00787997	0.001692	0.00439913
Phf3	0.128774	-0.123971	0.122915	0.023894	0.0113882	0.0210177	0.0164942	0.022261	0.00814858
Prim2	0.113348	-0.101762	0.0558911	0.0142145	0.0111929	0.0126282	0.0118885	0.017873	0.00988459
Rab23	0.171349	-0.132904	0.0106715	0.0199322	0.0201421	0.0219588	0.0158364	-0.0256022	0.00991834
Bag2	-0.0437708	0.00411048	0.025238	-0.00641699	-0.00545559	-0.00804356	-0.00667094	0.151976	-0.00560947
Zfp451	0.0911306	-0.0696729	0.050465	0.0149842	0.0131366	0.0153156	0.00868995	-0.00216321	0.0129309
Dst	0.0689519	-0.0681736	0.0315018	0.0121452	0.00949724	0.0118713	0.00650625	0.063156	0.0105914
Ccdc115	0.0807366	-0.100404	0.122944	0.0122042	0.010133	0.013437	0.00903506	0.100948	0.00105159
Imp4	0.127494	-0.125322	0.0911807	0.0163744	0.0173262	0.018777	0.0165515	0.0627012	0.00826887
Ptpn18	0.526753	-0.42094	0.0859639	0.054047	0.0644723	0.0566532	0.0431219	-0.0837529	0.0330335
Fam168b	0.243625	-0.208467	0.129134	0.0356702	0.0292932	0.0417933	0.0288705	0.00616487	0.0215235
Plekhb2	0.0295028	0.00366999	0.00489488	0.00337239	0.0028856	0.0135528	0.00242574	-0.0302842	0.00153866
Hs6st1	0.066478	-0.060961	0.0454648	0.0108127	0.0135181	0.0103002	0.00609126	0.048888	0.00742472
Uggt1	0.228646	-0.189976	0.116003	0.0323161	0.025312	0.0287024	0.0267195	0.00857012	0.0148986
Neurl3	0.176315	-0.172998	0.179067	0.0178334	0.0255404	0.724367	0.0175832	0.025942	0.0175687
Arid5a	0.13093	-0.130381	0.163076	0.0223375	0.0183728	0.0281189	0.0189298	0.0591478	0.00913589
Kansl3	0.0850587	-0.0583802	0.0333516	0.0105828	0.00823775	0.0130029	0.00880066	-0.00534895	0.0124012
Lman2l	0.0517163	-0.0112124	-0.00382611	0.00405031	0.00925446	0.009699	0.00282619	-0.02911	0.00557569
Cnnm4	0.0620604	-0.0593888	0.0724889	0.0139957	0.00545285	0.0131181	0.00694435	0.0350437	0.00444909
Cnnm3	0.0448388	-0.004272	0.0114668	0.0107701	0.00779508	0.00809754	0.0105295	-0.0323057	0.00530173
Ankrd23	-0.11351	-0.0376618	0.00884645	-0.02214	-0.0123088	-0.0160684	-0.0119388	0.402533	-0.0162666
Ankrd39	0.0598173	-0.0437727	0.00187999	0.00823171	0.0102915	0.0133159	0.00404256	-0.00602991	0.00501809
Sema4c	0.0611492	-0.0694412	0.110233	0.012758	0.0132316	0.014651	0.0166116	0.0545376	0.00681342
Cox5b	-0.598652	0.697609	-0.356356	-0.0911405	-0.093872	-0.10131	-0.084387	-0.234706	-0.0608711
Actr1b	0.173224	-0.149524	0.0512273	0.0217441	0.0197245	0.022949	0.0167395	0.0380947	0.0200305
Tmem131	0.0877384	-0.0536328	0.0554982	0.0123873	0.0147923	0.0171647	0.0115392	0.00959813	0.0092306
Inpp4a	0.0106058	0.019652	0.00224713	0.0166799	-0.00206844	0.00305738	0.000258379	-0.0368291	0.00216124
Coa5	0.0689686	-0.0412005	0.0261473	0.0117124	0.00869141	0.00372428	0.00855154	-0.00614683	0.00046123
Unc50	0.205849	-0.158616	0.0464573	0.0215661	0.0293301	0.0293508	0.0145877	-0.00978106	0.0155483
Mgat4a	0.115548	-0.0994757	0.119641	0.0164054	0.0125015	0.0196621	0.0224734	0.0161759	0.00655833
Lipt1	-0.0276635	-0.00383537	0.0331342	-0.00262986	-0.00542056	-0.0042468	-0.00340724	0.0867947	-0.00318422
Mitd1	0.167264	-0.152799	0.105697	0.0164923	0.0227888	0.022708	0.0145557	0.0114873	0.0104992
Mrpl30	-0.13993	0.167225	-0.115248	-0.0330697	-0.0356043	-0.0385308	-0.0285041	-0.0662185	-0.0212337
Txndc9	0.0913908	-0.0971856	0.0619801	0.00854182	0.00933376	0.0108325	0.0115597	0.0570302	0.00393939
Eif5b	0.0812425	-0.142234	0.208336	0.00844963	0.00818288	0.0229722	0.011647	0.0983461	-0.00156736
Rev1	0.0270188	-0.0210489	0.0234195	0.00356427	0.00456771	0.00262702	0.000418392	-0.00171219	-0.000261365
Aff3	0.137167	-0.0969262	-0.012632	0.0193738	0.0167729	0.0194779	0.0129226	-0.0449511	0.0123424
Lonrf2	-0.0391263	0.0440106	-0.0229433	-0.00249918	-0.00295445	-0.00347389	-0.0034694	-0.01893	-0.00171075
Pdcl3	0.124808	-0.146886	0.100245	0.0157778	0.0112133	0.0144098	0.0132291	0.0948781	0.007509
Npas2	-0.0114586	0.0312872	-0.0314679	0.000580703	-0.0019639	0.00197049	-0.00265661	-0.0445659	-0.000621181
Rpl31	0.68923	-0.600755	0.280428	0.0737555	0.0802202	0.0924726	0.0613311	0.0884384	0.048958
Tbc1d8	0.0571113	-0.0338426	0.0337285	0.00827278	0.00636294	0.0107958	0.00717696	-0.0231883	0.00357551
Cnot11	0.0731399	-0.0572629	0.0305558	0.0190608	0.0120566	0.0151265	0.00864596	0.0230474	0.00875936
Gm3646	-0.0992974	0.134301	-0.082521	-0.0116022	-0.0121097	-0.014789	-0.0122051	-0.0886178	-0.00998882
Map4k4	0.258947	-0.261926	0.268505	0.0372812	0.0345405	0.0413616	0.0369862	0.0657739	0.0179031
Il1r2	0.120546	-0.229981	0.652099	0.0349271	0.0144899	0.0292789	0.0349788	0.198116	0.00350892
Il1r1	0.229062	-0.194358	0.114862	0.480795	0.029205	0.0383185	0.0300577	0.00480083	0.0178062
Il1rl2	0.108985	-0.110988	0.0799165	0.00961967	0.0131584	0.0128735	0.0148643	0.0125727	0.00758417
Tmem182	-0.192241	0.161605	-0.0246909	-0.0200875	-0.0264022	-0.0225214	-0.0222352	0.101553	-0.0159834
Mrps9	-0.093813	0.151626	-0.0666892	-0.00808701	-0.0100364	-0.0156311	-0.0112404	-0.0820015	-0.00571564
Tgfbrap1	0.0632294	-0.0461202	0.0189876	0.00816976	0.00821733	0.0113745	0.00386907	0.00469414	0.00609261
AI597479	0.0175766	-0.0130927	0.0248631	0.00923067	-0.000211866	0.00348859	-0.000812804	0.0121546	0.00400129
Fhl2	-0.410716	0.561353	-0.319567	-0.0511677	-0.0551282	-0.0607898	-0.0556758	-0.30181	-0.0272026
Nck2	0.0701607	-0.0562596	0.034044	0.00701816	0.00729791	0.012134	0.00781459	-0.0132986	0.00302149
Ecrg4	0.608254	-0.465375	-0.00993766	0.0596025	0.0711276	0.0702703	0.042589	-0.132959	0.0456709
Uxs1	0.104248	-0.101949	0.0855053	0.0185167	0.0136443	0.0175882	0.0126735	0.0383639	0.00508523
Tpp2	0.0897741	-0.103718	0.10194	0.00970572	0.00866084	0.0107039	0.0105421	0.0763661	0.00275781
Tex30	0.0723408	-0.0856544	0.0796943	0.0145719	0.00915979	0.0120892	0.0107088	0.0572857	0.00493037
Poglut2	0.100879	-0.0745906	0.00227616	0.0107277	0.666943	0.0106327	0.007202	-0.0098335	0.00541269
Bivm	0.052809	-0.0410182	0.007456	0.00524063	0.00681401	0.00610516	0.00306141	0.00808011	0.00542294
Ercc5	0.059042	-0.0453748	0.0151562	0.00658964	0.0104867	0.00611595	0.00382285	-0.0136294	0.00424145
Gulp1	0.10174	-0.0680391	-0.00156775	0.00638404	0.018154	0.0118402	0.00788261	-0.0329176	0.00827897
Col3a1	0.819573	-0.617597	0.00565367	0.13031	0.134866	0.146483	0.065944	-0.196875	0.0972907
Col5a2	0.678118	-0.523884	0.00993183	0.130825	0.166449	0.0851668	0.0530758	-0.142614	0.0551118
Wdr75	0.063285	-0.0916737	0.104735	0.00997246	0.0117035	0.0116607	0.00799545	0.0902307	0.000340076
Slc40a1	0.109085	-0.0761433	0.00106258	0.00886707	0.0134668	0.013345	0.008211	-0.0471318	0.00665644
Slc39a10	0.0861526	-0.0699933	0.0423917	0.0119088	0.0204143	0.011414	0.010679	0.0129396	0.00777101
Cavin2	-0.102688	0.160942	-0.108814	-0.00379741	-0.0127576	-0.010644	-0.0127231	-0.12833	-0.00257458
Nabp1	0.00850906	-0.0491647	0.105613	0.00526943	-0.000401029	0.00309415	0.0052928	0.107173	0.000774853
Myo1b	0.111651	-0.0938413	0.0581326	0.0103483	0.0131158	0.0263854	0.00794539	-0.00339699	0.00688648
Stat1	0.357432	-0.266762	0.0972201	0.0378416	0.0462943	0.0409289	0.0320716	-0.075376	0.0238383
Gls	0.155801	-0.132643	0.128688	0.0187044	0.0207926	0.0198474	0.0141929	0.0231479	0.0140452
Nab1	0.139691	-0.121099	0.179604	0.0197303	0.0211204	0.0259974	0.0180414	0.0639021	0.00995529
Mfsd6	0.0807486	-0.0752519	0.0679208	0.0146083	0.00768283	0.0144536	0.00981824	0.00773576	0.00699116
Inpp1	0.0484621	-0.0294191	0.00196703	0.00237158	0.00795711	0.0100537	0.00595512	-0.0217602	0.00261482
Hibch	-0.0235475	0.0112438	-0.0207079	0.0952915	-0.00775713	-0.00817319	-0.00624293	-0.0240771	-0.00617567
Ormdl1	0.0275999	-0.0241891	0.0538946	0.00341535	-0.00137157	0.00255078	0.00462736	0.00986018	-0.00097218
Osgepl1	-0.0906765	0.111486	-0.049904	-0.00883546	-0.0129666	-0.0128064	-0.0113997	-0.0562591	-0.00775658
Asnsd1	0.0537332	-0.0541213	0.0524367	0.00140275	0.0014525	0.00342701	0.0028714	0.0205928	0.00557768
Stk17b	0.257963	-0.246247	0.245246	0.035384	0.0376422	0.0373744	0.0335004	0.0390038	0.018806
Hecw2	0.000122564	0.00320765	0.00385776	0.00290391	0.000989735	0.000600577	0.00293523	0.0262461	0.000244289
Gtf3c3	0.0385648	-0.0273445	0.0131507	0.00376286	0.00650843	0.003771	0.00611576	-0.00100048	0.0012026
Pgap1	0.0668782	-0.0388617	-0.00428829	0.00569229	0.00818375	0.00459	0.00334143	-0.0260874	0.00252051
Ankrd44	0.132334	-0.110572	0.0817817	0.0184605	0.0203244	0.0116435	0.0102696	-0.0156114	0.0101649
Sf3b1	0.19298	-0.165441	0.17026	0.0335	0.0270235	0.034915	0.0298195	0.0558829	0.0209157
Coq10b	0.059664	-0.0789888	0.0982102	0.0110181	0.00481601	0.0086742	0.00744076	0.0888153	0.0040441
Hspd1	-0.103404	0.0993824	0.0992936	0.150859	-0.018429	-0.00872276	-0.00500941	0.0775873	-0.0078575
Hspe1	0.0882968	-0.0796739	0.116756	0.00723189	0.00743925	0.00840204	0.00932897	0.127072	0.000470901
Mob4	0.0564373	-0.0603696	0.0663205	0.0154533	0.00450673	0.0081974	0.00869499	0.036441	0.00186209
Rftn2	0.167893	-0.114772	-0.000299596	0.020368	0.0231509	0.0216379	0.0119665	-0.0440981	0.0121038
Mars2	-0.0104707	0.0150238	0.0344109	-0.00259581	-0.0045429	0.00531748	0.000803043	0.0233349	0.00192831
Plcl1	0.0555832	-0.0339919	0.00992929	0.00903339	0.0111914	0.00797975	0.00672762	-0.00890195	0.00488151
1700066M21Rik	0.0642035	-0.0517401	0.0157699	0.00382482	0.00846508	0.01368	0.00674165	0.00449279	0.00623852
Tyw5	0.0736208	-0.078718	0.0341268	0.00971015	0.0105654	0.00949676	0.00478415	0.038047	0.00519985
Maip1	-0.0168517	0.0083687	-0.00424237	-0.00686821	-0.00620262	-0.00422987	-0.00597315	0.0257621	-0.00671995
Spats2l	0.0936788	-0.0594406	-0.00805204	0.00625648	0.0121015	0.0143083	0.00919892	-0.0273536	0.00646353
Kctd18	0.0533089	-0.0419489	0.0432765	0.0103173	0.00859491	0.0112332	0.00555507	0.00417091	0.00523242
Sgo2a	0.0165623	0.00117617	-0.016407	-0.00214567	-0.00205271	-0.00125697	0.00051868	-0.0379061	-0.00298819
Aox1	-0.0138082	0.036132	-0.0311539	0.000917611	-0.00187852	0.00086062	-0.00257117	-0.0210754	-0.00146214
Bzw1	0.263336	-0.263882	0.237942	0.0372442	0.0361168	0.0401639	0.0321674	0.112271	0.0176841
Clk1	0.10175	-0.041835	0.0610594	0.0280327	0.0227656	0.0244871	0.0157116	-0.0486291	0.0197133
Ppil3	0.0977693	-0.0876686	0.0389394	0.0130222	0.0112167	0.0149354	0.00965995	0.0219186	0.00750247
Nif3l1	0.0737051	-0.0639886	0.0169908	0.011001	0.00732609	0.00849051	0.00661391	0.0355224	0.00513594
Orc2	0.0669622	-0.0670217	0.0606424	0.0118807	0.0159614	0.0133749	0.0101175	0.0472199	0.00619101
Fam126b	0.0203667	-0.0281836	0.0546353	0.00444975	0.0032717	0.00764279	0.00733762	0.0448971	0.00278457
Ndufb3	-0.241414	0.248884	-0.160683	-0.0474414	-0.0469655	-0.0516199	-0.0401956	-0.0465327	-0.0272055
Cflar	0.170579	-0.169416	0.184267	0.0256209	0.0237991	0.0269598	0.0254112	0.0576929	0.0179462
Casp8	0.187834	-0.196377	0.202855	0.0230448	0.0237841	0.0276639	0.0264835	0.0539311	0.0101127
Trak2	-0.0092119	0.0338354	-0.000886188	0.00269654	-0.00512709	-0.00600007	-0.0033676	-0.00249158	-0.00141356
Stradb	-0.0411287	0.0499527	-0.0448622	-0.00722808	-0.00432984	-0.0063444	-0.00911512	0.00620202	-0.00431824
Tmem237	0.106731	-0.0890191	0.0255501	0.0124689	0.0174172	0.00869368	0.0110555	0.00519946	0.0106715
Fzd7	0.0956126	-0.0748569	0.0454703	0.00775182	0.0150102	0.0193901	0.00891548	0.00752263	0.0111851
Sumo1	0.208628	-0.180896	0.0988649	0.0237393	0.0230925	0.0230027	0.0197647	0.0074603	0.0144901
Nop58	0.134897	-0.221816	0.328754	0.0298057	0.023522	0.0244561	0.0278119	0.210483	0.0103981
Bmpr2	0.0965016	-0.0758203	0.0434565	0.0113461	0.00889916	0.0114732	0.00767467	0.0341189	0.00631376
Fam117b	0.0996419	-0.0818862	0.0524947	0.00847597	0.00847992	0.0161793	0.00957507	-0.00307445	0.00888354
Wdr12	0.0285816	-0.0661083	0.0942691	0.00603066	-0.000593362	0.00760574	0.00510664	0.107878	0.00189545
Carf	0.0183891	-0.00281223	0.00397624	0.00580877	0.00610045	0.00558823	0.00228207	-0.00540222	0.00487762
Nbeal1	0.0276107	-0.0192463	0.0280595	0.00331534	0.00550046	0.00481532	0.00712102	0.0160954	0.00200561
Cyp20a1	0.164117	-0.149444	0.0741445	0.0177301	0.0267615	0.0178952	0.0176693	0.0330528	0.0173699
Abi2	0.0789436	-0.0785187	0.0718074	0.0121149	0.00536953	0.0132094	0.00913096	0.0191608	0.00820768
Raph1	0.0449581	-0.0428727	0.0498717	0.00949466	0.00474538	0.00717209	0.00621485	0.0879332	0.00559694
Pard3b	0.0387255	-0.0290148	-0.00130252	0.00299854	0.00719559	0.00513396	0.00313173	-0.0113241	0.00232452
Nrp2	0.176382	-0.136276	0.115195	0.0288145	0.0259654	0.0287751	0.0214499	-0.0247085	0.0148676
Ino80d	0.059739	-0.0478117	0.0863323	0.0162849	0.0157795	0.0108315	0.00833339	0.0193594	0.00752123
Ndufs1	-0.251403	0.303719	-0.120873	-0.0311007	-0.0327594	-0.0358067	-0.0286041	-0.0886997	-0.0215459
Eef1b2	0.666187	-0.629125	0.228568	0.0651796	0.0710186	0.0727389	0.0572644	0.0811112	0.0383766
Fastkd2	-0.023534	0.0341004	-0.00416857	-0.00146743	-0.00267419	0.00119214	-0.000912679	-0.0116265	-0.00250809
Klf7	0.080371	-0.105276	0.215605	0.0149954	0.0105766	0.02151	0.0123608	0.0860027	0.0123468
Creb1	0.108769	-0.0919993	0.085751	0.0154212	0.0193257	0.022178	0.0128794	0.012129	0.00766834
Mettl21a	0.13035	-0.110659	0.0338784	0.0156445	0.0185575	0.0190539	0.0122132	0.00205445	0.00825828
Ccnyl1	0.125229	-0.117144	0.041735	0.00960398	0.0162702	0.0173588	0.0152712	0.0288509	0.0130547
Fzd5	0.200995	-0.165281	0.034704	0.0226043	0.0228112	0.0286155	0.0169829	-0.0248986	0.0142787
Plekhm3	0.122839	-0.104405	0.0438251	0.0232146	0.0182664	0.0177848	0.00806618	-0.00704928	0.00844163
Idh1	0.141278	-0.0989304	0.0440409	0.0140577	0.0181915	0.0120158	0.0129589	-0.0443336	0.00800408
Pikfyve	0.100201	-0.0802918	0.0480902	0.0162362	0.0148277	0.0138707	0.012626	-0.000996456	0.00746511
Rpe	0.142315	-0.127826	0.069369	0.0189731	0.0160068	0.0175013	0.0207946	0.00918863	0.00527478
Kansl1l	0.00156709	0.0107085	0.0071067	-0.00141868	0.00173589	0.00151975	-0.000484394	-0.00872134	0.000817238
Acadl	-0.35341	0.420264	-0.210736	0.0378395	-0.056102	-0.0592289	-0.0473047	-0.101407	-0.0301057
Myl1	0.0407645	0.0123008	-0.0964952	0.00270196	0.00716137	0.00414028	0.000460233	-0.0198612	0.0101378
Lancl1	0.0406287	0.00706819	-0.0205013	0.0086717	0.00374741	0.0126829	0.0052192	-0.0407342	0.00835683
Atic	0.0946695	-0.118852	0.133584	0.0161922	0.0119978	0.024544	0.0126216	0.110186	0.00609863
Fn1	0.861882	-0.694868	0.166097	0.0965861	0.191014	0.22551	0.0704873	-0.130093	0.0645137
Mreg	-0.026173	0.0370322	-0.00591815	-0.0053605	-0.000116332	0.000418504	0.000981589	-0.00127974	-0.00364371
Pecr	0.0246326	-0.0185618	0.00465803	-0.0013433	0.00588549	0.00171576	0.00124476	-0.00764752	-0.000749452
Xrcc5	0.0354836	-0.0218891	0.00702751	0.00461187	0.00747351	0.00347149	0.00413217	0.00377169	0.00195657
Smarcal1	0.0110401	-0.00168993	-0.00190578	-0.00212791	0.000837417	-0.00440853	0.000494956	-0.00586495	-0.00502865
Rpl37a	0.800515	-0.721118	0.17915	0.0663115	0.076397	0.0798107	0.14385	0.00454687	0.0434177
Igfbp5	0.103732	-0.0197119	-0.0562647	0.0184866	0.0239052	0.0211266	0.0058046	-0.0799916	0.0138546
Tns1	-0.146245	0.234629	-0.0866834	-0.00263043	-0.00822691	-0.00605369	-0.0133353	-0.0597076	-0.00646471
Arpc2	0.470828	-0.521741	0.430766	0.0556571	0.0502846	0.0601676	0.053926	0.199401	0.0286082
Aamp	0.194292	-0.160313	0.0714721	0.0229771	0.0293936	0.0260393	0.0194633	0.00796447	0.0131168
Pnkd	-0.0216005	0.116619	-0.0987856	-0.0023238	-0.00613684	-0.00886643	-0.0075695	-0.115362	0.00476217
Tmbim1	0.230034	-0.247767	0.137912	0.0302588	0.028977	0.0407084	0.0259344	0.188419	0.0228974
Slc11a1	0.2896	-0.287731	0.308989	0.0344363	0.0330218	0.0364786	0.0397171	0.0566681	0.0181099
Ctdsp1	0.0809518	-0.0192239	0.0270508	0.0133899	0.0113441	0.010157	0.00793358	-0.037352	0.00575169
Usp37	0.0655218	-0.0584275	0.0510442	0.00671861	0.0166133	0.00891	0.0130963	0.00925485	0.00311942
Cnot9	0.0932625	-0.0813395	0.0590787	0.0151477	0.0153914	0.011717	0.0116577	0.0127342	0.00720354
Zfp142	0.0796222	-0.0534047	0.0518024	0.0157126	0.0157982	0.0157318	0.010485	-0.00199221	0.0105301
Bcs1l	-0.0314602	0.0477735	-0.0364885	-0.00467229	-0.00807879	-0.00781473	-0.00922349	-0.0114477	-0.00466433
Rnf25	0.0988348	-0.0718089	0.0170628	0.0149369	0.00772225	0.0133841	0.00700828	-0.0179699	0.00618909
Ttll4	0.0393299	-0.0287245	0.0121386	0.00908722	0.00783346	0.0109922	0.00694936	0.00683302	0.00896684
Cyp27a1	0.0516476	-0.00574491	-0.0297861	0.00506869	0.00720045	0.00583436	0.00365521	-0.0610654	0.00632903
Nhej1	0.0380899	-0.0198573	0.00380246	0.00399405	0.00883735	0.00472681	0.00290873	-0.0139249	0.0014098
Cnppd1	0.179029	-0.137475	0.084273	0.0305024	0.0295916	0.0260364	0.0187555	-0.00782421	0.0164495
Retreg2	0.223074	-0.168394	0.0650401	0.035899	0.0267277	0.0337104	0.0191674	-0.0253638	0.0177824
Zfand2b	0.101837	-0.0657571	0.0178231	0.00896052	0.0157476	0.0126985	0.00857488	-0.00494127	0.0097828
Abcb6	-0.0273472	0.0571368	-0.0371842	-0.00386693	-0.00149394	-0.003556	-0.00437453	-0.0307931	-0.00199837
Atg9a	0.00126726	0.0495983	-0.0488559	0.00197674	0.000360617	-0.000331018	-0.00410575	-0.0549978	0.00211679
Ankzf1	0.0401708	-0.0135491	-0.00755645	0.00703041	0.0120264	0.00420506	0.00585852	-0.0189659	0.0114512
Stk16	0.187743	-0.147633	0.0438276	0.0188748	0.0243695	0.0179588	0.0145908	-0.0230603	0.0158123
Tuba4a	-0.40404	0.491889	-0.196149	-0.0412819	-0.0474243	-0.0492434	-0.0448987	-0.0995808	-0.0254262
Dnajb2	-0.0445281	0.0770747	0.00941235	0.00386704	-0.00180606	0.00114673	-0.00424754	0.0188938	-0.000615089
Ptprn	0.0903101	-0.0655296	-0.0317616	0.0116596	0.0112041	0.0176074	0.0063645	-0.0237253	0.00591317
Dnpep	0.172062	-0.102761	-0.0030935	0.023047	0.0314749	0.0241551	0.014205	-0.0645876	0.0172862
Des	0.0769597	-0.263097	0.113021	-0.00202545	0.00144432	0.0647865	0.00272185	0.611788	-0.00116598
Speg	-0.0330876	0.0371748	-0.0211079	0.00145506	-0.00324271	0.00429812	-0.00245361	0.0663082	0.00182322
Gmppa	0.211546	-0.153406	0.0302644	0.0246843	0.0289993	0.0260265	0.0184595	-0.037156	0.0167247
Chpf	0.444105	-0.3257	-0.00843404	0.288092	0.0593004	0.063698	0.0370987	-0.0872166	0.0340045
Obsl1	0.0408123	0.0370005	-0.0486809	0.00460283	0.0126075	0.00403357	0.000829814	-0.0845132	0.00813291
Inha	-0.0250634	0.0588521	-0.0420105	-0.0023818	0.00059369	-0.000242357	-0.0046609	-0.0428562	0.00119517
Stk11ip	0.0665252	-0.0430281	0.0305579	0.0149156	0.0130739	0.0116233	0.00821607	-0.00905864	0.00859743
Slc4a3	-0.226376	0.306654	-0.139476	-0.0236163	-0.0252907	-0.0215689	-0.0265474	-0.124607	-0.0144544
Epha4	-0.0750893	0.104063	-0.0457801	-0.00906242	-0.00638081	-0.00420268	-0.00836909	-0.0749949	-0.00748126
Farsb	0.0384889	-0.0453048	0.0679797	0.00402643	0.00315671	0.00494106	0.00840672	0.0521442	-0.000951747
Acsl3	0.0865183	-0.0654699	0.0520723	0.0121833	0.00857666	0.00956711	0.00786144	-0.0139348	0.00298159
Kcne4	0.314669	-0.270444	0.104051	0.0373503	0.0410518	0.0406366	0.0311289	-0.0123232	0.0243913
Wdfy1	0.143051	-0.182104	0.146746	0.0187355	0.0168554	0.0196808	0.0167347	0.162931	0.0092719
Mrpl44	-0.0561134	0.0964901	-0.0373043	-0.00466503	-0.00388288	-0.00561916	-0.00393669	-0.0406792	-0.00128411
Serpine2	0.549997	-0.415126	-0.00784974	0.0643903	0.0739021	0.0731018	0.0443788	-0.108302	0.0445299
Cul3	0.0548416	-0.0669495	0.116275	0.00855901	0.00292209	0.00290434	0.00789903	0.056367	0.00142254
Dock10	0.146613	-0.110253	0.0481225	0.0203969	0.0207836	0.0167734	0.0140603	-0.0226993	0.014548
Irs1	0.0288304	0.037768	-0.0669041	0.00905352	0.00474228	0.00415008	-0.0026547	-0.0969312	0.00417567
Rhbdd1	0.0542125	-0.0483971	0.0484258	0.0110405	0.010986	0.00591614	0.00916355	0.0291412	0.00147032
Col4a4	0.00293581	0.0143271	-0.0194836	0.00125781	0.00121069	0.840101	-0.00228052	-0.0328833	0.00794932
Mff	0.0224837	0.000901812	-0.0145657	-0.00368899	-0.00401831	-0.00111029	-0.00198529	-0.000858869	-0.00120179
Agfg1	0.142474	-0.144612	0.12008	0.0194065	0.0187632	0.0177815	0.0192749	0.0764655	0.0108363
Pid1	0.197598	-0.180732	0.151473	0.0273021	0.0226928	0.0261687	0.0206728	0.0315095	0.0154866
Trip12	0.146837	-0.109135	0.0851498	0.0243588	0.0186797	0.0217554	0.0147508	-0.00929838	0.00630721
Fbxo36	0.0856359	-0.0609399	-0.00663679	0.00508032	0.00950712	0.0148417	0.00539405	-0.0294747	0.00767724
Sp110	0.224601	-0.188871	0.0741126	0.0256175	0.0273018	0.0281955	0.0196101	-0.0283019	0.0145657
Sp140	0.251326	-0.196262	0.0834584	0.0246338	0.0331729	0.03128	0.020133	-0.0358327	0.0160387
Sp100	0.256898	-0.19781	0.113095	0.0270442	0.0354009	0.035066	0.0218709	-0.04102	0.0170589
A630001G21Rik	0.150115	-0.127368	0.0750143	0.0170756	0.0224612	0.0189521	0.0144383	-0.0159561	0.00995055
Cab39	0.0843553	-0.0927332	0.11555	0.00702202	0.00953035	0.012232	0.00606831	0.0826435	0.00492693
Itm2c	0.528746	-0.401887	0.0636912	0.0596195	0.0642085	0.0678108	0.0402423	-0.118219	0.0361983
Psmd1	0.117008	-0.203597	0.201125	0.00363312	0.00376111	0.0104869	0.0143917	0.146151	-0.00393752
Ncl	0.175387	-0.285876	0.40497	0.0281509	0.0179693	0.0272086	0.70874	0.252759	0.00422948
C130036L24Rik	0.0181723	-0.00233203	-0.01576	0.00139965	-0.00150641	0.00389479	-0.00130691	-0.0176327	0.00203183
Ptma	0.613018	-0.583849	0.434809	0.162536	0.0819903	0.097921	0.0739671	0.114035	0.0446138
Pde6d	0.100689	-0.0689983	-0.023618	0.013161	0.00848979	0.0141153	0.00302639	-0.0215869	0.00784088
Cops7b	0.0459761	-0.031515	0.00816802	0.0117782	0.00294403	0.00443766	0.00328415	-0.00545424	0.00457866
Dis3l2	0.0637993	-0.0406182	0.0128132	0.0119634	0.00984296	0.00742975	0.00962157	-0.0119032	0.00401645
Eif4e2	0.304535	-0.273807	0.157355	0.0375123	0.0370645	0.0415494	0.031574	0.0343438	0.0231678
Efhd1	0.00952302	-0.0201978	-0.00689237	-0.00460563	-0.00134203	-0.00139243	-0.000947094	0.0240277	0.000186746
Gigyf2	0.0994663	-0.100656	0.0802823	0.0165556	0.00987333	0.0153026	0.015064	0.022204	0.00574693
Inpp5d	0.270023	-0.25397	0.239495	0.0373964	0.0395344	0.0355815	0.034735	0.0408314	0.0161483
Atg16l1	0.0520293	-0.0313134	0.0307394	0.00985852	0.0110566	0.00916843	0.00527225	0.0101901	0.00801968
Dgkd	0.111426	-0.105992	0.0847596	0.0174706	0.0169117	0.0185278	0.0118927	0.0360328	0.00796452
Usp40	0.0313814	-0.0223645	0.0172854	4.3831e-05	0.0069642	-0.0012923	0.00192014	-0.00235286	0.00251001
Hjurp	0.122775	-0.0637549	0.00705753	0.0222852	0.0233942	0.0242831	0.0106359	-0.0616905	0.0126956
Arl4c	0.232639	-0.222227	0.207245	0.0316284	0.026656	0.0366299	0.0275509	0.0453085	0.0190631
Sh3bp4	0.0517836	-0.0386986	0.0222781	0.00126325	0.0127777	0.0127576	0.000852354	0.00388586	0.00233808
Agap1	0.0597356	-0.0559609	0.0658063	0.00606993	0.0104519	0.00811035	0.0104504	0.020338	0.00600635
Asb18	-0.0645414	0.0823578	-0.0401609	-0.00735141	-0.00783216	-0.0142551	-0.00645204	-0.0381994	-0.00816903
Ackr3	-0.0894486	0.115502	0.0212665	-0.00465865	-0.00607236	-0.00686349	-0.00725407	-0.0303046	-0.00113128
Cops8	0.0562062	-0.0505641	0.0429898	0.00415288	0.0118886	0.00483436	0.00587133	0.039948	-0.000644781
Col6a3	0.498827	-0.379912	0.0282262	0.0609186	0.0751014	0.0682668	0.0438715	-0.0902503	0.0438134
Lrrfip1	0.115465	-0.170066	0.218869	0.0151562	0.00682965	0.0209306	0.0200243	0.174092	0.00582396
Ramp1	0.0790556	-0.0257237	-0.0164249	0.00735881	0.01011	0.00684558	0.00853045	-0.0646009	0.00553601
Ube2f	0.0948419	-0.0975723	0.0864288	0.0120852	0.0176085	0.0123961	0.0117533	0.0776894	0.00392955
Scly	0.060513	-0.04416	0.0129643	0.00318641	0.00424426	0.00607748	0.00178278	-0.0115868	0.00426549
Klhl30	-0.0705193	0.0895765	-0.0400776	-0.00160433	-0.00949982	-0.00935812	-0.00942102	-0.0237604	-0.0046159
Ilkap	0.081656	-0.0473222	0.0664526	0.015585	0.0189126	0.01558	0.0100782	-0.00597071	0.00872471
Hes6	0.0614616	-0.0181079	-0.00986601	0.00776072	0.009902	0.00745662	0.0017223	-0.037551	0.00305316
Per2	0.00876741	-0.00723074	0.0335347	0.00239118	0.000163075	0.00300055	0.00505436	0.0246378	0.000874678
Traf3ip1	0.0249475	-0.0125761	0.0018664	0.000101319	0.012709	0.00902379	0.00226496	-0.0139915	0.00739716
Asb1	0.0193217	-0.00933904	0.032698	-8.92711e-05	0.00426355	0.0113771	0.00154763	0.00920295	0.00930857
Hdac4	0.0491894	-0.0268265	0.0496971	0.0112112	0.00718111	0.0124606	0.00744418	-0.00829861	0.00450082
Ndufa10	-0.309362	0.335497	-0.16172	-0.0427643	-0.0448869	-0.052379	0.154753	-0.124551	0.198222
Cops9	0.244056	-0.115839	-0.0208778	0.0241511	0.0264238	0.0259595	0.0152391	-0.107581	0.0148562
Gpc1	-0.202039	0.315672	-0.162936	-0.0137405	-0.0133049	-0.0171648	-0.0218471	-0.174662	-0.00705929
Ankmy1	-0.0879005	0.0872082	-0.0601263	-0.0108362	-0.0102103	-0.0139276	-0.0144067	-0.0647281	-0.00931065
Dusp28	-0.0198751	0.0441233	-0.0449274	-0.00781489	-0.00317369	-0.0019868	-0.00744572	-0.0473847	-0.00467483
Rnpepl1	0.0870624	-0.0357743	0.0236605	0.0141093	0.00983108	0.0286219	0.00881593	-0.034508	0.0128869
Capn10	0.0840709	-0.0639777	0.00524918	0.00503249	0.00866387	0.0125163	0.0110917	0.00681787	0.00471786
Gpr35	0.148664	-0.19827	0.323089	0.0247837	0.015302	0.0236565	0.0277004	0.14341	0.0110823
Sned1	0.0413648	-0.0147777	-0.00217878	0.00478032	0.014714	0.00965386	0.00545105	-0.0414043	0.0061023
Mterf4	0.0279472	-0.0085384	0.00172267	0.0105097	0.000751228	0.00478873	0.00236343	-0.0173866	0.00201541
Ppp1r7	0.0407466	-0.02676	0.0355376	0.000888358	0.00566107	0.00368026	0.00728135	0.0105562	0.00362293
Hdlbp	0.254556	-0.177173	0.0456412	0.0321412	0.0275979	0.0294029	0.0146464	-0.0719883	0.0161025
Farp2	0.000141584	0.00549063	-0.008385	0.00827126	0.00369987	-0.000504792	0.00277092	-0.0135152	-0.000812661
Stk25	0.0980326	-0.059418	0.0149063	0.0133892	0.020172	0.0169647	0.011315	-0.0132007	0.00955816
Bok	0.244762	-0.191745	0.0253674	0.0280018	0.0344804	0.0337026	0.0227322	-0.0366751	0.0184656
Thap4	-0.00728477	0.034012	-0.0374604	0.000594662	0.000393716	-0.00137777	-0.00490558	-0.0398404	-0.00134571
Atg4b	0.116273	-0.085918	0.031583	0.0151245	0.0143776	0.0163381	0.0127566	-0.00642913	0.00758757
Dtymk	0.192479	-0.171295	0.0982862	0.0223995	0.0257942	0.0318228	0.0216374	0.0366649	0.014843
Ing5	0.0576352	-0.0538097	0.0684343	0.0092826	0.00900195	0.00387784	0.0138822	0.0159928	0.010365
D2hgdh	-0.0199825	0.0583677	-0.0159903	-0.00487485	-0.00186341	-0.00256127	-0.000269526	-0.045322	-0.00156578
Fam174a	0.0926577	-0.0648489	-0.00394443	0.00944509	0.00841527	0.00935511	0.000413052	0.000745991	0.0028488
St8sia4	0.0503086	-0.0516374	0.0968532	0.0059909	0.0101213	0.00833947	0.00621432	0.0210802	-0.000532651
D1Ertd622e	0.162345	-0.167167	0.183468	0.0274813	0.0197109	0.0198412	0.0194284	0.0436419	0.00970574
Ppip5k2	-0.072171	0.107699	-0.0382966	-0.00367148	-0.0101557	-0.00633394	-0.00914677	-0.0645359	-0.0045506
Gin1	0.00146906	0.0128012	-0.0177687	0.0038185	0.000929831	0.00381078	0.000365619	-0.0193534	-0.000879092
Pam	0.0610947	0.0754345	-0.126949	0.0187578	0.0276865	0.0214967	0.00532799	-0.0967015	0.0210752
Pign	0.109875	-0.104756	0.0679018	0.017966	0.0135299	0.024767	0.0123221	0.0234689	0.00693241
Relch	0.048156	-0.0328958	0.0467256	0.00745787	0.00728201	0.00817605	0.01139	0.0125298	0.0105134
Tnfrsf11a	0.161712	-0.141744	0.0621658	0.0194851	0.0257328	0.0193947	0.0163676	0.0101526	0.0095285
Zcchc2	0.098186	-0.0946395	0.105544	0.0139099	0.017008	0.0159597	0.013604	0.0244339	0.00368595
Phlpp1	0.0068548	0.0151739	-0.00777735	0.000208727	0.00128291	0.0060782	0.000624784	-0.0227119	0.00405344
Bcl2	0.0593001	-0.0649251	0.0193294	0.00620476	0.00292599	0.0130237	0.00357436	0.0261402	0.000581157
Kdsr	0.0911402	-0.0732665	0.0417418	0.0165281	0.0122109	0.0141833	0.0130927	-0.00118639	0.00462347
Vps4b	0.212468	-0.192491	0.15877	0.0322945	0.0378243	0.0412272	0.0219429	0.0324175	0.0175546
Serpinb8	0.0867792	-0.0658555	0.0311514	0.0105237	0.0160907	0.0112751	0.0129213	-0.00917611	0.00178336
D830032E09Rik	-0.0492015	0.0677088	-0.0455576	-0.0117718	-0.00579491	-0.00455753	-0.00245	-0.0442314	-0.00394522
Dsel	0.128809	-0.108624	0.0324207	0.0190295	0.0152687	0.0148521	0.0137544	-0.0120234	0.0100474
Tsn	0.155306	-0.135458	0.097712	0.0206161	0.023213	0.0228327	0.0170722	0.0204804	0.0121432
Nifk	0.0942777	-0.159813	0.198094	0.0153665	0.0176063	0.018568	0.0184374	0.191425	0.00440529
Clasp1	-0.204923	0.240757	-0.123402	-0.0255285	-0.0306338	-0.035812	-0.027516	-0.0970019	-0.0148878
Inhbb	0.160766	-0.191925	0.21192	0.0213923	0.019223	0.0233602	0.0219556	0.130719	0.00979908
Ralb	0.214146	-0.226145	0.231025	0.0295784	0.0217613	0.0306837	0.0264352	0.0923516	0.0143791
Tmem185b	0.0816407	-0.102952	0.13926	0.0109524	0.0129057	0.010801	0.0142544	0.0873585	0.00394239
Ptpn4	-0.0377975	0.0494124	-0.00343894	-0.00183543	-0.00566443	-0.00697882	-0.0025352	-0.00957912	-0.00446142
Tmem177	-0.0277243	0.0510551	-0.0354069	0.00103608	-0.00266696	-0.00652316	-0.00491555	-0.0197004	-0.00359737
Tmem37	0.283514	-0.227265	0.0425565	0.0226358	0.027259	0.0278994	0.0193805	-0.0647357	0.0153592
Dbi	0.111259	-0.0390837	-0.0470032	-0.00826237	-0.00640193	-0.00725177	-0.00428883	-0.0869359	-0.00535582
3110009E18Rik	0.012228	-0.0091849	0.00936933	-0.00451019	0.00213333	0.0017186	0.00273856	0.0224399	-0.0020048
Steap3	0.175261	-0.109844	-0.0121367	0.0197499	0.0296917	0.0219766	0.0164911	-0.0601698	0.0123587
Marco	0.0515994	-0.0289877	0.00157675	0.0147156	0.011446	0.00733536	0.00664431	-0.0306583	0.00696174
Gm29346	-0.0426392	0.038929	-0.0121802	-0.00443462	-0.00482335	-0.00519317	-0.0083063	0.0154786	-0.000122853
Insig2	0.00270429	0.00578655	0.00309085	-0.00450727	0.00117724	0.00203481	0.000427661	0.0233378	0.00168501
Ccdc93	0.0767449	-0.0564055	0.0349327	0.0119551	0.0133674	0.00848537	0.0086225	-0.00667565	0.00770178
Ddx18	0.121402	-0.162137	0.16656	0.0133438	0.0117849	0.017153	0.0168692	0.104193	0.00829177
Actr3	0.434233	-0.454243	0.397038	0.255506	0.0511022	0.0597679	0.0532265	0.160916	0.0244866
Slc35f5	-0.0118838	-0.001589	-0.01583	-0.00539248	0.406959	-0.00447997	-0.00452709	0.0923609	-0.00747724
Gpr39	0.206051	-0.171477	0.0374602	0.0249487	0.0248645	0.0296221	0.0170551	-0.0156629	0.0146585
Mgat5	0.142473	-0.105039	0.0882201	0.0169082	0.0255483	0.0226324	0.0174575	0.00841802	0.012213
2900009J06Rik	2.19574e-05	-0.00583901	-0.0100926	-0.0016951	-0.00368848	-0.00010917	-0.00245333	0.0130165	-0.000336583
Ccnt2	0.0139591	0.0060446	0.0436446	0.00388756	0.00578336	0.00762822	0.00240958	-0.00460199	-0.000566206
Rab3gap1	0.0433934	-0.0171809	0.0091536	0.00878976	0.00748885	0.00346164	0.00852766	-0.000599051	0.00407975
R3hdm1	0.0739457	-0.0653386	0.0721194	0.0101248	0.0125707	0.00767939	0.00877023	0.0246462	0.0034366
Ubxn4	0.154054	-0.215299	0.214444	0.0203737	0.0219708	0.0280275	0.023986	0.179426	0.00325256
Mcm6	0.26921	-0.256994	0.128387	0.0330243	0.0311255	0.0394859	0.0324878	0.0274344	0.0164814
Dars	0.053181	-0.0472071	0.0700723	0.0127451	0.0129449	0.0134253	0.00935562	0.0444919	-5.92295e-06
Cxcr4	0.218703	-0.190151	0.188245	0.0343382	0.0288449	0.0296142	0.0269276	0.0119551	0.0163569
Cd55	0.161817	-0.11574	0.00436452	0.0188748	0.022367	0.0186726	0.0135776	-0.0488795	0.0192378
Pfkfb2	-0.0691755	0.100596	-0.0622083	-0.00774444	-0.00467375	-0.00342997	-0.00814359	-0.0720336	-0.00441675
Yod1	0.0137905	-0.00879276	0.0255059	0.000351611	-0.00505801	0.0155343	-0.00199088	-0.00420414	0.00354314
Mapkapk2	0.00753692	-0.0175008	0.102126	-0.00408073	-0.00699201	0.000170649	0.00210302	0.115901	-0.000904533
Eif2d	0.0623493	-0.0299616	-0.0092487	0.0107791	0.00806354	0.00383828	0.00113554	-0.0342026	0.00697614
Rassf5	0.238063	-0.237179	0.235926	0.0265311	0.0279659	0.0300293	0.0220563	0.022522	0.0142486
Ikbke	0.144114	-0.14769	0.1869	0.0204726	0.0179571	0.0240261	0.0233383	0.036091	0.0137854
Srgap2	0.172047	-0.127148	0.0541557	0.0216237	0.020651	0.0180991	0.02091	-0.0400942	0.0157016
Rab7b	0.376079	-0.314268	0.104998	0.0356198	0.0374059	0.0376074	0.0285751	-0.0430215	0.0180308
Pm20d1	-0.0435011	0.0619601	-0.0357317	-0.00789727	-0.00817492	-0.00987109	-0.00523691	-0.0387059	-0.00219029
Slc41a1	0.0317017	-0.00531744	0.00222033	0.00845834	0.00368083	0.00767277	0.00302343	-0.00132511	0.00635266
Rab29	0.226767	-0.180916	0.0524431	0.0235509	0.0295301	0.0303096	0.0186168	-0.0165445	0.0150001
Nucks1	0.202769	-0.200102	0.145707	0.0302655	0.0224475	0.0285292	0.0214358	0.0352238	0.0110065
Slc45a3	0.149891	-0.105359	0.00396005	0.0170176	0.0237689	0.0149228	0.0103782	-0.0429889	0.0134833
Elk4	0.115697	-0.0748308	0.0477706	0.0142992	0.020055	0.0245662	0.0131529	-0.0102644	0.0133581
Cdk18	0.0777075	-0.048346	-0.00582708	0.0057136	0.00852108	0.0106963	0.00878199	-0.0182783	0.00375725
Klhdc8a	-0.120848	0.161055	-0.0802922	-0.0128363	-0.0131558	-0.02019	-0.0142772	-0.0955844	-0.00782147
Nuak2	0.172942	-0.167486	0.142172	0.0205316	0.0187528	0.0297935	0.022007	0.0223666	0.0136851
Tmcc2	0.00379587	0.01523	-0.00895789	0.00315793	0.00228328	0.00296736	-0.000834567	-0.023328	-0.00190441
Dstyk	0.0776878	-0.0560457	0.0265003	0.0172076	0.0136296	0.0127669	0.00997856	0.00391203	0.0101668
Rbbp5	0.0686198	-0.0595168	0.0359024	0.00723507	0.0109527	0.0160263	0.00390382	0.00654861	0.00345434
Lrrn2	0.106865	-0.0726787	-0.00405873	0.0135025	0.0138283	0.0108787	0.0100779	-0.0203198	0.0108328
Mdm4	0.0656709	-0.0427567	0.0284374	0.0122632	0.0122956	0.0148455	0.0100274	-0.00547184	0.0102975
Pik3c2b	-0.0451226	0.0611608	-0.0328149	-0.0028212	-0.00353899	-0.00218986	-0.00148862	-0.00903416	-0.00357516
Ppp1r15b	0.148351	-0.166233	0.181312	0.0220983	0.0256124	0.0215898	0.0210547	0.0706085	0.00705764
Plekha6	-0.0531256	0.101304	-0.0588236	0.000481933	0.00126896	-0.000813548	-0.00246218	-0.0361571	0.00320129
Sox13	0.0308619	-0.00237728	-0.0102082	0.00566342	0.00665027	0.00472944	0.00481736	-0.0286706	0.000980071
Snrpe	0.290512	-0.290059	0.164675	0.0275575	0.0295024	0.0356768	0.0282217	0.0857184	0.0168224
Atp2b4	0.0486561	-0.0116079	0.015178	0.0109759	0.0103895	0.00928588	0.00869367	-0.0337505	0.00707814
Prelp	0.342818	-0.164991	-0.0866812	0.0463096	0.0549939	0.0517426	0.0271031	-0.167891	0.0382806
Fmod	0.552732	-0.418067	-0.0219388	0.0571593	0.0710654	0.0619807	0.0391713	-0.111322	0.0466698
Btg2	0.0119954	-0.0339563	0.082317	0.0015029	-0.00271377	0.0010317	0.00397995	0.110686	-0.00220581
Adora1	-0.0284588	0.0336621	0.000264978	-0.000598757	-0.000848284	0.000172923	-0.00160237	0.0225855	0.00146401
Ppfia4	0.171978	-0.135405	0.0172869	0.0155365	0.0162455	0.0187756	0.0128768	-0.0223846	0.010405
Tmem183a	0.145129	-0.140134	0.114651	0.0273218	0.0181406	0.0225857	0.0139021	0.0457041	0.0121122
Cyb5r1	0.0761212	-0.0656011	0.0940873	0.0106933	0.00831991	0.0177647	0.0142717	0.0438974	0.00628703
Adipor1	0.184392	-0.149699	0.0824308	0.0210772	0.0187262	0.0227282	0.00809914	0.00231383	0.012043
Klhl12	0.00612318	0.0109826	0.00747071	0.00529648	0.00232731	0.00880021	-0.00143181	-0.0101425	0.00359225
Rabif	0.145516	-0.141389	0.0890354	0.0203034	0.021996	0.0153515	0.0195388	0.0409496	0.00561746
Kdm5b	0.14562	-0.12463	0.0581432	0.0162995	0.0221134	0.0197931	0.015512	0.00357675	0.0110939
Ppp1r12b	-0.147155	0.204297	-0.0903034	-0.0122879	-0.0122527	-0.0126938	-0.0161907	-0.0715013	-0.00816616
Ube2t	0.00991249	0.00739263	-0.00728885	-0.00263728	0.000749799	-0.00304831	0.00222139	-0.013464	0.00187457
Lgr6	-0.0790076	0.107173	-0.0443487	-0.00644807	-0.00853016	-0.00796171	-0.00864756	-0.0587155	-0.00443404
Ptpn7	0.100984	-0.124558	0.202288	0.0121666	0.00981373	0.0163711	0.0141223	0.0491126	0.00785792
Arl8a	0.224602	-0.203472	0.154754	0.0336918	0.0271027	0.0285829	0.0267077	0.0387324	0.018569
Rnpep	0.302581	-0.264637	0.187964	0.034111	0.0328325	0.0364716	0.0290198	-0.0073047	0.0174342
Timm17a	-0.0843928	0.0753666	-0.024037	-0.0170915	-0.0153983	-0.0094387	-0.0155993	0.0302573	0.581315
Lmod1	0.140145	-0.0948254	0.00234011	0.0243436	0.024486	0.0174795	0.00941009	-0.0453523	0.0123289
Shisa4	0.229886	-0.18731	0.0100178	0.0312649	0.0270444	0.0318067	0.0167463	0.0139808	0.0253808
Ipo9	0.137678	-0.110224	0.0648693	0.0185036	0.0191975	0.0203001	0.0180002	-0.00242764	0.0105062
Nav1	0.21757	-0.180024	0.0837942	0.0280992	0.0297494	0.0314516	0.0249927	-0.00759883	0.0180658
Csrp1	0.521619	-0.422672	0.121932	0.0619845	0.0664981	0.0667285	0.0517223	-0.0520309	0.0377897
Phlda3	0.498034	-0.384463	0.0625658	0.0616394	0.06562	0.0689223	0.0427004	-0.0414751	0.0450691
Tnnt2	-0.647688	0.727131	-0.354679	-0.0642931	0.00591118	-0.0650667	-0.0832005	-0.125071	-0.0533138
Tmem9	0.250406	-0.172315	-0.0138291	0.0277432	0.0306655	0.0367892	0.0148722	-0.0872683	0.0215904
Cacna1s	-0.0583032	0.0794033	-0.043876	-0.00685961	-0.00967658	-0.00722168	-0.00714839	-0.0412354	-0.00495171
Kif21b	0.16234	-0.144234	0.0818061	0.0191592	0.0228004	0.0229572	0.0127671	-0.00131818	0.00783245
Camsap2	0.105797	-0.0811532	0.0622697	0.0200139	0.0156139	0.0207864	0.0107318	0.019691	0.0126341
Ddx59	0.012233	-0.0074097	-0.00677921	0.0028395	-0.00131573	-0.00284889	-0.00276794	-0.0146796	0.000224632
Zfp281	0.103602	-0.103929	0.132249	0.0247702	0.0133805	0.0225378	0.0177399	0.0279634	0.00854269
Ptprc	0.318368	-0.30937	0.31707	0.0390571	0.0362713	0.0412898	0.0397887	0.0518578	0.0215231
Nek7	0.0857147	-0.0686137	0.0506055	0.00920688	0.0112981	0.0145359	0.0102913	0.0336747	0.00142759
2310009B15Rik	0.120189	-0.0962776	0.00320894	0.00593318	0.00832498	0.00762678	0.00765706	-0.0116089	0.0035081
Dennd1b	0.0426915	-0.0249253	0.0522667	0.00568543	0.00618268	0.00896094	0.0042388	0.0030744	0.00210102
Zbtb41	0.0816187	-0.0798339	0.0651756	0.0115184	0.00665803	0.0168736	0.00710961	0.00884938	0.00879796
Cfh	0.263193	-0.116307	-0.0398352	0.0492813	0.0501747	0.0478962	0.0264978	-0.0989401	0.039222
Kcnt2	0.0796312	-0.0540101	-0.000584124	0.011456	0.0115373	0.0100824	0.00547018	-0.0131453	0.009951
Cdc73	0.0431913	-0.0429413	0.0648363	0.0115557	0.0058841	0.00581657	0.00806829	0.0298812	0.00387574
B3galt2	-0.0510735	0.0215607	-0.0182517	-0.00703326	-0.00549888	-0.00940028	-0.00631475	0.0447829	-0.00442908
Glrx2	0.0498243	-0.0233551	-0.000659396	0.00524399	-0.000602952	0.00269831	0.00447582	0.00204199	-7.49386e-05
Ro60	0.0889479	-0.104506	0.0742573	0.0159947	0.00854508	0.0169326	0.0114635	0.0754645	0.00993878
Uchl5	0.069649	-0.0794013	0.0843381	0.00859984	0.00157437	0.0095806	0.00871566	0.0439668	0.00494291
Rgs2	0.0365708	-0.000978619	0.0652836	0.00223892	-0.00137751	0.00524831	0.00255715	-0.0705106	-0.0044645
Pla2g4a	0.159075	-0.170807	0.169197	0.0212395	0.0221987	0.0242639	0.0233441	0.0603242	0.0115287
Ptgs2	0.0890463	-0.142188	0.302872	0.0188416	0.0127506	0.0258146	0.0247013	0.134941	0.00575601
Odr4	0.0644762	-0.0507332	0.0107524	0.0116699	0.00789263	0.00998476	0.00639125	-0.00135491	0.00643113
Tpr	0.114233	-0.133625	0.188009	0.0174621	0.00871545	0.0171143	0.0165344	0.0688225	0.00600741
Prg4	0.0838364	-0.181127	0.311525	0.0204451	0.0127259	0.0244878	0.0217776	0.346163	0.00895214
Hmcn1	0.0276226	-0.00834381	-0.0150241	0.00659672	0.00817567	0.00512147	0.00349101	-0.029515	0.00668617
Gm10138	0.0160753	-0.00166435	-0.019738	0.00796648	0.0044239	0.00204477	0.000171866	-0.0271504	0.00596107
Ivns1abp	-0.345627	0.429632	-0.22502	-0.0335928	-0.0335113	-0.0411251	-0.0408446	-0.217988	-0.0242001
Swt1	0.0584276	-0.0733371	0.0671686	0.00882897	0.00656932	0.00519203	0.00977505	0.0309881	0.000418316
Trmt1l	0.0284579	-0.02411	0.0100801	9.67178e-05	0.00224252	-0.00231279	-0.00198312	0.0012716	0.00772658
Rnf2	0.142385	-0.121322	0.0614511	0.0204837	0.0190111	0.0250111	0.0160686	0.0116415	0.00645925
Fam129a	0.253541	-0.210336	0.0628216	0.0252309	0.030742	0.031796	0.0203703	-0.0227039	0.0179281
Edem3	0.0833894	-0.0740134	0.0387428	0.012454	0.0068974	0.00904155	0.010241	0.0264922	0.00225386
1700025G04Rik	0.0792864	-0.079176	0.0523885	0.016913	0.0131192	0.012211	0.0102929	0.0963424	0.0043202
Tsen15	0.0476451	-0.0424544	0.0272531	0.0102132	0.0041126	0.00553185	0.00524112	0.0194546	0.00563496
Colgalt2	-0.0056703	0.0247066	-0.018764	0.00105864	0.000731017	0.000414347	-0.00290047	-0.0235033	-0.00143372
Rgl1	0.162045	-0.1278	0.0588596	0.0214498	0.0224955	0.01802	0.0162832	-0.00917928	0.0126321
Arpc5	0.486194	-0.486664	0.45573	0.0615407	0.0564861	0.0670481	0.0594334	0.12609	0.0251814
Ncf2	0.318053	-0.3209	0.343747	0.0460341	0.0387897	0.046144	0.039086	0.0728936	0.0154106
Smg7	0.0506751	-0.0277142	0.0704583	0.0135241	0.00901296	0.0154227	0.00896877	0.0138079	0.00325073
Lamc2	0.0221688	-0.0298281	0.0657773	0.00209838	-0.000374456	0.0100949	0.00338141	0.0659717	0.00470567
Lamc1	0.370626	-0.257268	0.000331759	0.0457293	0.0542033	0.0495697	0.0348173	-0.0629275	0.0350096
Dhx9	0.148457	-0.132015	0.10212	0.0262019	0.0301851	0.0308349	0.0195838	0.0429417	0.0132683
Npl	0.115578	-0.0896936	0.0239683	0.0186524	0.0169832	0.0194445	0.00976055	-0.00796057	0.00830203
Rgs16	0.0402338	-0.0674515	0.075719	0.00456753	0.00389224	0.00412484	0.897878	0.0287403	9.00514e-05
Rnasel	0.109364	-0.137324	0.245891	0.0206284	0.0165487	0.0177842	0.0168268	0.0603912	0.00318149
Glul	-0.0669903	0.0496281	0.031396	-0.00497998	-0.0069732	-0.0048669	-0.00761748	0.138397	-0.00679203
Ier5	0.18991	-0.211879	0.287599	0.0330514	0.0262917	0.0388444	0.0304492	0.171627	0.0160343
Mr1	0.0545164	-0.035418	-0.0101294	0.0106925	0.00405834	0.00402681	0.00323739	-0.0219332	0.00618136
Stx6	0.1574	-0.150673	0.0873299	0.028626	0.0238393	0.0273363	0.0194426	0.0194203	0.0208367
BC034090	-0.00147495	0.0289875	-0.0119401	0.00278489	0.00422916	0.00151857	-0.00091793	-0.00911627	0.00224268
Xpr1	0.0677896	-0.0606976	0.0513477	0.0076147	0.00654017	0.0140173	0.0115199	0.0165961	0.00526887
Gm5532	-0.168116	0.219373	-0.114666	-0.0187241	-0.0152645	-0.0176641	-0.020207	-0.088407	-0.00966428
Acbd6	0.0573035	-0.0311541	0.0190773	0.00823742	0.010545	0.00889213	0.00707804	0.000318118	0.00139034
Qsox1	0.27945	-0.239231	0.0646407	0.0330869	0.0373411	0.0424435	0.0251719	0.051679	0.021872
Cep350	0.0720568	-0.0716168	0.0716221	0.00369982	0.0104683	0.0159564	0.0139492	0.0184626	0.00710891
Tor1aip1	0.179235	-0.132902	0.0918386	0.023605	0.016579	0.0285164	0.0207698	-0.0223549	0.0150987
Tor1aip2	0.213264	-0.181214	0.10903	0.026428	0.0301182	0.0296625	0.021794	0.0412052	0.0139868
Gm2000	0.165992	-0.143279	0.0421746	0.0209312	0.0157815	0.017031	0.0155396	0.018119	0.00655889
Soat1	0.303502	-0.273944	0.194688	0.0427783	0.0374809	0.0465564	0.0318063	0.0158255	0.0192622
Abl2	0.0882135	-0.0805624	0.0740718	0.0171832	0.0149339	0.0148064	0.0134594	0.0192119	0.00821454
Tor3a	0.324141	-0.243895	0.0337879	0.0246992	0.039834	0.0434553	0.0266446	-0.0651592	0.0206889
Fam20b	0.0669119	-0.0524952	0.0348039	0.527264	0.00568285	0.0136265	0.00658339	0.00069152	5.30837e-05
Ralgps2	0.019566	4.74169e-05	0.00815023	-0.00236008	-0.00116624	0.00122089	0.00171117	-0.0231024	0.000110221
Rasal2	0.0497293	-0.0349057	0.01369	0.00811259	0.00510215	0.0134571	0.00651389	0.00164496	0.00888213
Cryzl2	0.133528	-0.0866565	-0.0191428	0.0138508	0.0160852	0.0200403	0.0066215	-0.05313	0.010945
Sec16b	0.129653	-0.0839381	0.00132457	0.0140254	0.019789	0.0182363	0.0144686	-0.0305044	0.0161274
Cop1	0.117896	-0.100052	0.0828551	0.00992183	0.0175405	0.0166322	0.0101557	0.00806389	0.00534164
4930523C07Rik	0.144629	-0.100931	0.0238807	0.0232152	0.0240535	0.0304529	0.0127484	-0.030549	0.00964012
Mrps14	0.0381371	-0.0127424	-0.00527227	-0.00166686	-0.00525186	-0.00327012	1.164e-05	-0.0148256	0.0006572
Cacybp	0.108187	-0.105369	0.111549	0.0149741	0.0161208	0.0158504	0.0116814	0.0590422	0.00591963
Rabgap1l	-0.00826931	0.0210722	-0.013973	-0.00187783	-0.00494928	-0.00124132	-0.00242594	-0.0123274	0.000716503
Rc3h1	0.0863677	-0.0462198	0.0230187	0.0126921	0.0123993	0.0162067	0.00861147	-0.0311255	0.0110412
Zbtb37	0.0178729	-0.00830837	0.029968	0.00859846	0.00614443	0.00753968	0.00111736	-0.00108372	0.00242489
Gas5	0.595584	-0.527892	0.150193	0.0623962	0.0713516	0.0749275	0.0566519	0.0424836	0.0408285
Dars2	-0.0110339	0.0232112	-0.0211628	-0.001869	-0.00456969	-0.00614797	-0.00596495	-0.0269802	-0.00334105
Cenpl	0.101651	-0.089427	0.0440399	0.00869163	0.0155667	0.012481	0.0142289	-0.00676649	0.0051942
Klhl20	0.0555865	-0.043791	0.0248712	0.00880812	0.00315568	0.00762855	0.00496401	0.00910597	0.00451811
Prdx6	0.0321071	-0.076412	0.232947	0.00788956	-0.00148577	0.00360893	0.00881388	0.153134	-0.00437728
Suco	0.0811306	-0.0892643	0.119179	0.0136817	0.0149469	0.0180963	0.0169723	0.0427526	0.00780701
Pigc	0.152555	-0.112723	0.0257269	0.0111105	0.0167474	0.0195966	0.0143882	-0.0299918	0.012018
Dnm3os	0.277783	-0.19081	-0.00315103	0.0424573	0.0414553	0.0363712	0.024704	-0.077573	0.026956
Eef1aknmt	0.0551173	-0.0628744	0.0704424	0.00387178	0.00435419	0.0130151	0.00687453	0.0461764	0.00404784
Vamp4	0.147726	-0.127458	0.107931	0.0238947	0.0195401	0.02441	0.0149158	0.0164581	0.0109432
Prrc2c	0.137342	-0.164187	0.232309	0.0282811	0.0175929	0.0245248	0.0233327	0.0907746	0.00768389
Fmo1	0.000585368	0.0406455	-0.0577285	0.00382852	-0.004471	-0.00143494	-0.00214968	-0.0526799	0.00339444
Fmo2	-0.0196548	0.0451832	-0.0340273	-0.000658083	-0.000527286	-0.00319757	0.000641567	-0.0376539	-0.000304835
Prrx1	0.177838	-0.137933	0.0543057	0.0250904	0.0245789	0.0267504	0.0153626	-0.0277657	0.00940384
Gorab	0.0669688	-0.0697739	0.0564936	0.00996584	0.00650343	0.00824397	0.00655271	0.0155718	0.00579068
Kifap3	0.0616458	-0.0248061	-0.0165907	0.00491887	0.0115541	0.0133655	0.00520703	-0.0305459	0.00612023
Scyl3	0.101419	-0.0860908	0.0723028	0.0221121	0.0126764	0.0178567	0.013757	-0.00253681	0.0106261
Sell	0.0986738	-0.180495	0.465585	0.0247328	0.0135499	0.0220635	0.0246515	0.15976	0.00590384
Selp	0.10074	-0.152157	0.200104	0.012528	0.0116978	0.0160636	0.0158142	0.178687	0.00734342
Slc19a2	0.0385073	-0.0417607	0.0600118	0.00884055	0.00482254	0.0121479	0.00751501	0.0157187	0.00185674
Ccdc181	0.013648	0.00367406	-0.0121829	-0.000861647	0.00107936	0.00219641	-0.00115323	-0.0111401	0.00762219
Blzf1	0.0376581	-0.0283421	0.0344123	0.00622353	0.00797559	0.00924693	0.0108343	0.0279983	0.00216306
Nme7	0.0437	-0.043428	-0.00507723	0.00556471	0.00271046	0.001873	0.00168466	0.0114061	0.00129868
Atp1b1	-0.124387	0.107338	-0.0637055	-0.0161503	-0.0108657	-0.0139888	-0.0150523	0.173398	-0.00718432
Dpt	0.549375	-0.381575	-0.0335742	0.0609223	0.0704619	0.0712648	0.0414211	-0.18485	0.0458736
Sft2d2	0.156329	-0.137636	0.121976	0.0186522	0.020804	0.0230711	0.0174096	0.0154727	0.0149655
Tiprl	0.0886907	-0.0755145	0.0546037	0.0052137	0.013116	0.01137	0.011224	0.0242819	0.00682634
Dcaf6	-0.0522047	0.0876764	-0.0475647	-0.00345267	-0.00485975	-0.00660912	-0.0063193	-0.0492338	-0.00470777
Mpc2	-0.413827	0.465096	-0.253749	-0.0769695	-0.0768539	-0.0872729	-0.0633342	-0.18398	-0.0473875
Mpzl1	0.232162	-0.169869	0.0114985	0.0255688	0.0337234	0.0384313	0.0210185	-0.0531685	0.0200455
Rcsd1	-0.00995905	0.0621147	-0.0475217	0.00606534	0.00277158	-0.00360417	-0.00337834	-0.067586	0.000850617
Creg1	0.291957	-0.205376	0.0288025	0.0248293	0.0245852	0.0314751	0.0142324	-0.107243	0.013043
Pou2f1	0.0467208	-0.0377838	0.019545	0.00385728	0.00649032	0.00685155	0.00425308	-0.000791668	0.00307973
Dusp27	-0.033767	-0.0324263	0.0643315	-0.00467588	-0.0112611	-0.00471307	0.000912741	0.185723	-0.00464056
Tada1	0.0819518	-0.0557626	0.0364418	0.0119457	0.0138518	0.0174809	0.0113259	0.000183851	0.00686993
Pogk	0.0480826	-0.0479543	0.0562636	0.00266706	0.00267099	0.794313	0.00361534	0.0190851	0.00795577
Fam78b	0.0748944	-0.073727	0.0592967	0.0160007	0.0103424	0.0172862	0.0121585	0.0176001	0.00446779
Uck2	0.085522	-0.321482	0.280885	0.00413878	-0.000446621	0.0117246	0.0143126	0.688034	-0.0020035
Tmco1	0.0515771	-0.0173466	-0.0142402	0.00503423	0.00163047	0.0013649	-0.00511672	-0.0374183	0.00855682
Aldh9a1	0.151801	-0.124147	0.0803265	0.0148278	0.017035	0.0157686	0.0128516	-0.0319107	0.00437994
Mgst3	-0.361718	0.430568	-0.227246	-0.0496938	-0.0554059	-0.0626838	-0.0505673	-0.171836	-0.0276715
Rxrg	-0.126883	0.16325	-0.0857007	-0.0211644	-0.0171967	-0.0241146	-0.0165057	-0.083442	-0.00897676
Pbx1	0.082687	-0.058595	0.0338617	0.0189781	0.0118051	0.0183335	0.00525657	-0.0279755	0.0079859
Nuf2	0.130883	-0.0970784	0.00677295	0.0105783	0.0165415	0.0128973	0.00868425	-0.0439399	0.0136564
Rgs5	0.0776173	0.0576371	-0.108256	0.0197623	0.0206426	0.0165581	0.00281837	-0.185861	0.0136053
Rgs4	0.16484	-0.0985657	-0.023077	0.0166818	0.022346	0.0292979	0.0160827	-0.077768	0.0112358
Hsd17b7	-0.0302114	0.0403275	0.00481209	-0.00430506	-0.00261154	0.00111373	-0.000666884	-0.00524351	-0.00116023
Ddr2	0.15344	-0.138739	0.099243	0.0273132	0.0182545	0.0317057	0.0194629	0.00497451	0.0150199
Uap1	0.125399	-0.13753	0.125744	0.0217256	0.0140802	0.0195933	0.0166383	0.0857552	0.0139169
Uhmk1	0.123048	-0.116378	0.101817	0.0155572	0.0111586	0.68927	0.0116942	0.0203526	0.0133648
Gm7694	-0.0135098	0.0194832	0.0079595	-0.00604529	-0.00271813	-0.00785955	-0.000581555	-0.00964564	0.00031201
Olfml2b	0.47001	-0.346545	0.00642032	0.0583461	0.0617367	0.0591759	0.0331074	-0.1122	0.0351909
Atf6	0.0301144	-0.0306572	0.055306	0.000458997	0.00258802	0.00640857	0.00843996	0.0346965	0.00579043
Dusp12	0.12044	-0.116336	0.0494965	0.0113132	0.0140318	0.0130394	0.0111824	0.0324231	0.00606768
Fcgr2b	0.389594	-0.391198	0.476046	0.0529547	0.0386859	0.0503856	0.0463211	0.1103	0.0213132
Fcgr4	0.34345	-0.289685	0.145188	0.0297295	0.648136	0.0346819	0.0310763	-0.0186495	0.0198618
Fcgr3	0.557246	-0.531158	0.47838	0.0673011	0.0590135	0.06892	0.0568824	0.0635864	0.0332405
Sdhc	-0.250504	0.319932	-0.164308	-0.0405797	-0.0366317	-0.0447385	-0.0324112	-0.119058	-0.0236416
Pcp4l1	-0.182538	0.217727	-0.0865532	-0.0217273	-0.02303	-0.0231789	-0.0224486	-0.0141592	-0.0137161
Tomm40l	-0.0495721	0.0966759	-0.0513653	-0.00656884	-0.00912832	-0.00841234	-0.00740779	-0.0529339	-0.00410298
Fcer1g	0.746303	-0.654314	0.345194	0.0766442	0.078893	0.0827037	0.0660681	-0.00675962	0.0434156
Ndufs2	-0.380121	0.514391	-0.224949	-0.0456917	-0.0481007	-0.0533254	-0.0467203	-0.193688	-0.0273334
Adamts4	0.112763	-0.19431	0.339115	0.0243184	0.0159665	0.0265935	0.0275685	0.174232	0.00250988
B4galt3	0.151954	-0.122035	0.0754346	0.0185587	0.0230353	0.0214632	0.0176895	0.00922717	0.011472
Ppox	0.0903073	-0.0466758	-0.00873891	0.0127693	0.0153271	0.0160972	0.00547923	-0.0355274	0.0133673
Usp21	0.0800553	-0.0573056	0.0174017	0.00574375	0.0133783	0.0144557	0.0094437	-0.00652202	-0.000278718
Ufc1	0.220627	-0.15985	0.0341512	0.024644	0.030282	0.021929	0.0187198	-0.0415538	0.0144106
Dedd	0.0971333	-0.0793957	0.0409779	0.00870195	0.0123655	0.012822	0.00769325	0.0108337	0.0042508
Nit1	0.0677984	-0.0458534	0.00903445	0.0117221	0.00414023	0.0031528	0.00370077	-0.0129204	0.00173726
Pfdn2	0.0771645	-0.0922658	0.0741354	0.00686776	0.00631931	0.00802392	0.00695155	0.0829841	0.00159522
Arhgap30	0.225258	-0.231032	0.22182	0.0277773	0.0199309	0.0329819	0.0260731	0.0500951	0.0111928
Usf1	0.0837136	-0.0861436	0.0491722	0.0044232	0.00499413	0.0020857	0.00339846	0.0200567	0.00197539
F11r	0.0422941	-0.0105899	0.0242683	0.0126872	0.0152182	0.0128152	0.010211	0.00389919	0.00507297
Alyref2	0.0345133	-0.0349558	0.0202109	0.00315837	0.00422585	0.00586105	0.00488257	0.00781768	0.00260702
Ly9	0.333669	-0.267734	0.0640435	0.0333376	0.0379289	0.0348526	0.0280631	-0.0559218	0.0153141
Cd48	0.388454	-0.316627	0.0783447	0.0454284	0.0476626	0.051396	0.0280124	-0.0458624	0.0236532
Cd84	0.301634	-0.259453	0.170058	0.0357013	0.0302652	0.0402349	0.0332508	-0.0124036	0.0157934
Ncstn	0.22967	-0.169027	0.0295741	0.0245108	0.0316569	0.0293663	0.0212341	-0.0501315	0.019112
Copa	0.249594	-0.213132	0.141364	0.030301	0.0274895	0.373374	0.0285388	0.0366801	0.018833
Pex19	-0.0412301	0.0918359	-0.0528139	0.000800223	-0.00422742	-0.00208052	-0.00762413	-0.0695829	-0.00105561
Dcaf8	0.0481047	0.0109813	-0.0151814	0.00823024	0.0086724	0.00708822	0.00301212	-0.0462265	0.00546897
Pea15a	0.426054	-0.324941	0.0642402	0.286653	0.0584888	0.0542398	0.0374732	-0.0494457	0.0309514
Casq1	-0.0419578	0.0530285	-0.0213927	-0.00169679	-0.00299651	-0.00245766	-0.00139768	0.0107797	-0.00302684
Igsf8	0.282768	-0.216625	0.0659301	0.0303728	0.0366863	0.0438003	0.0272456	-0.0238911	0.0269846
Atp1a2	-0.290502	0.378326	-0.183485	-0.0310192	0.171522	-0.0391924	-0.0342736	-0.140516	-0.0176604
Pigm	0.0859373	-0.095108	0.106746	0.0228843	0.0117935	0.020671	0.0126391	0.0364905	0.00695594
Slamf9	0.341797	-0.253672	0.00832995	0.0363854	0.0440527	0.0402129	0.0252316	-0.0666508	0.0250432
Tagln2	0.61526	-0.55829	0.318175	0.0763603	0.23547	0.0807766	0.0650215	0.054694	0.0406868
Dusp23	0.0257057	-0.0132293	0.00191553	-0.000169285	0.000825585	0.0033887	0.00165937	-0.0245823	0.00545036
Ifi209	0.251358	-0.225558	0.204387	0.0282671	0.0244093	0.0308699	0.0281972	0.0249568	0.013019
Ifi207	0.2787	-0.239094	0.162315	0.029111	0.0293397	0.0351418	0.0299733	-0.000760571	0.0214881
Ifi204	0.361922	-0.309444	0.195534	0.036818	0.0402209	0.0455921	0.0373643	-0.00496696	0.0210083
Mndal	0.297564	-0.225548	0.0613147	0.0290821	0.0345619	0.0340472	0.0247446	-0.061097	0.0163306
Ifi211	0.121611	-0.131884	0.0959583	0.00985687	0.00952694	0.0133655	0.90043	0.0172322	0.00244831
Ifi203	0.178728	-0.116085	0.0478947	0.027876	0.0287566	0.0221903	0.0139686	-0.0620309	0.0132165
Ifi205	0.0945242	-0.0799003	0.0455526	0.00457644	0.00299669	0.00755091	0.0086713	0.0101929	0.00219007
Spta1	-0.021795	0.033028	-0.0232042	0.00272336	-0.00402096	-0.00326831	-0.00319077	-0.0152159	-0.000880409
Fh1	-0.257647	0.315708	-0.127536	-0.0381058	-0.0370981	-0.0419017	-0.0309721	-0.0775865	-0.0225951
Chml	0.00173975	-0.000529021	0.0398456	0.00155783	-0.00142619	0.000846422	0.0052985	0.0139436	0.0023306
Cep170	0.17176	-0.217766	0.265102	0.0281621	0.0237713	0.0300801	0.0363278	0.132545	0.011723
Sdccag8	0.0922253	-0.0791089	0.0505942	0.00663311	0.00954074	0.0160773	0.012244	0.0155399	0.0059038
Akt3	0.115238	-0.0933931	0.0576291	0.0148117	0.0166785	0.0135126	0.0122124	-0.000440861	0.0107085
Zbtb18	0.0227198	-0.0120878	0.0324111	0.00234028	0.00587056	0.00529006	0.00358892	-0.00510324	0.00481476
Adss	0.190918	-0.186578	0.142489	0.020394	0.0334357	0.0362586	0.0246505	0.0435577	0.0171494
Desi2	0.123824	-0.102668	0.0627789	0.0151476	0.0107238	0.0150378	0.011472	0.0103316	0.00845568
B230369F24Rik	-0.0497159	0.0672963	-0.0323715	-0.00596686	-0.00921001	-0.00921826	-0.00723852	-0.0393763	-0.00297073
Cox20	-0.0176069	0.0666858	-0.112457	-0.0180271	-0.00926379	-0.0109357	-0.0101075	-0.0796185	-0.0030635
Hnrnpu	0.257436	-0.235427	0.274963	0.0345872	0.0344713	0.0440255	0.0387069	0.0854265	0.0195377
Efcab2	-0.14133	0.180542	-0.0764817	-0.0118282	-0.0185489	-0.0195519	-0.0173253	-0.0808386	-0.0115867
Kif26b	0.390991	-0.297242	0.000872407	0.0392497	0.0479143	0.0475992	0.0300217	-0.0880223	0.0253023
Smyd3	0.0760417	-0.0552252	0.0173708	0.00663642	0.00758545	0.00827452	0.00635825	-0.034123	0.00422986
Tfb2m	-0.0127383	0.0141809	0.00475179	-0.00430933	-0.00031657	-0.00390951	-0.00236602	0.0124043	0.00225056
Cnst	-0.022333	0.0552115	-0.0213399	0.00522892	0.00605368	-0.00358922	-0.00144241	-0.0324305	-0.00380119
Sccpdh	-0.0263617	0.0692585	-0.0360259	-0.00541732	-0.00524741	-0.00343087	-0.00186007	-0.0516876	-0.00117173
Ahctf1	0.104439	-0.112313	0.11649	0.0110656	0.0161638	0.016011	0.0141763	0.0558816	0.0064533
Cdc42bpa	0.140879	-0.113282	0.0584129	0.0168044	0.0181699	0.0319876	0.0130222	-0.0064531	0.0136603
Coq8a	-0.337125	0.474142	-0.260453	-0.037823	-0.0343223	-0.0423124	-0.0406828	-0.276831	-0.0172633
Psen2	0.176202	-0.135181	0.0306534	0.0190954	0.0244222	0.0231118	0.0154173	-0.0190901	0.013216
Itpkb	-0.0114824	0.0680735	-0.00745129	0.0113998	0.00972445	0.0136051	0.00402363	-0.0616579	0.00291026
Parp1	0.101974	-0.0776994	0.0339198	0.0108075	0.0136193	0.00529162	0.0126052	-0.0245603	0.00464088
Acbd3	0.149393	-0.162081	0.156513	0.018077	0.0166634	0.0251677	0.0211216	0.0614548	0.00715526
H3f3a	0.518926	-0.420422	0.184659	0.174653	0.056573	0.0601719	0.0428529	-0.0563718	0.0294858
Sde2	0.0715616	-0.071882	0.0740459	0.643051	0.00592773	0.0149477	0.0148708	0.0148944	0.00418534
Pycr2	0.128441	-0.124578	0.0984269	0.0210318	0.0203573	0.0174887	0.0195635	0.0541026	0.00794999
Lefty1	0.0973377	-0.0820251	0.0425452	0.0217648	0.0103061	0.0217937	0.0135961	0.0021801	0.00841672
Tmem63a	0.150952	-0.0920886	0.0278776	0.0176343	0.0290561	0.030417	0.0127245	-0.0352587	0.0153348
Ephx1	0.233801	-0.143424	-0.0237573	0.0281155	0.0329841	0.0324149	0.0161518	-0.0773675	0.0293598
Nvl	0.056917	-0.0400775	0.0230044	0.0102945	0.0184244	0.0141545	0.00358121	-0.00729183	0.0122493
Cnih4	0.15221	-0.163028	0.070291	0.00667597	0.0149759	0.450312	0.00874541	0.0834789	0.0125921
Wdr26	0.167172	-0.154829	0.131629	0.0188208	0.0233854	0.0265586	0.0172947	0.056821	0.00789356
Lbr	0.0650336	-0.0820985	0.13369	0.0135346	0.00670053	0.0131638	0.013595	0.0351606	0.00590468
Enah	0.0259704	-0.227465	0.24178	0.00245055	-0.00417586	0.00818554	0.00874754	0.608343	-0.00554434
Srp9	0.25139	-0.247439	0.158008	0.0229531	0.0237606	0.0252629	0.0212778	0.052943	0.0093832
Degs1	0.0777055	-0.0943966	0.0613473	0.00903175	0.00706195	0.00868702	0.00635185	0.00873966	0.00050748
Fbxo28	0.0964237	-0.0939616	0.0915098	0.0181834	0.00982033	0.021437	0.0135802	0.0236434	0.00714667
Trp53bp2	0.0870284	-0.0771542	0.0788005	0.0168668	0.0112807	0.0163332	0.0133685	0.0150262	0.00605511
Capn2	0.375751	-0.355817	0.185674	0.0419726	0.0440673	0.048712	0.0357811	0.0735977	0.0266547
Disp1	0.112288	-0.0709026	-0.00348887	0.0132882	0.0114151	0.0162593	0.00455456	-0.044138	0.00905231
Brox	0.117621	-0.0943109	0.033738	0.0132316	0.0139608	0.0136282	0.00829585	-0.00579112	0.00467037
Aida	0.236119	-0.204604	0.0666977	0.0234397	0.0266711	0.0245927	0.0239287	-0.00157687	0.0141871
Mia3	0.167815	-0.139473	0.0833281	0.0257817	0.0213024	0.0293513	0.0167265	0.00794918	0.0149626
Taf1a	-0.00649488	0.0104368	-0.00573984	-0.00344348	0.00872893	0.0149034	-0.00391979	0.0164166	-0.000571072
Dusp10	0.00235075	-0.0267853	0.0501266	-0.00562997	0.000269118	-0.000967612	0.00287472	0.100072	0.00120591
Hlx	0.119982	-0.0953188	0.070349	0.0238402	0.0226902	0.0219684	0.0102957	-0.0161273	0.0115643
2021-03-02	0.184047	-0.129364	0.0184479	0.0224137	0.0194492	0.0245999	0.0174041	-0.0441294	0.00877237
C130074G19Rik	0.0430397	-0.0239598	0.0293192	0.00951952	0.00760088	0.0140043	0.00862738	-0.00762792	0.00529369
Mark1	0.0482854	-0.0249773	0.00620845	0.0115242	0.010795	0.00420838	0.00352619	-0.0176774	0.00258569
Rab3gap2	0.126462	-0.128027	0.0751683	0.0152237	0.0108922	0.016758	0.0102269	0.0505749	0.00917846
Iars2	-0.0267483	0.0534305	-0.0261981	-0.0054253	-0.000911181	-0.00526485	-0.00318225	-0.0251539	0.00115675
Bpnt1	0.0537523	-0.0551975	0.0512116	0.0100821	0.0126302	0.0101458	0.00978834	0.0449269	0.00181947
Eprs	0.102276	-0.139005	0.119607	0.00847999	0.00895925	0.0165871	0.00938434	0.0848713	0.00980645
Tgfb2	0.150692	-0.225038	0.0975036	0.0119948	0.0181173	0.0236092	0.015664	0.245297	0.00850791
Rrp15	0.114439	-0.143743	0.156349	0.016015	0.0131773	0.0173058	0.0123507	0.0995504	0.00488148
Gpatch2	0.0406585	-0.0290894	0.0187007	0.011334	0.00397248	0.0049863	0.0039846	0.00465709	0.00656584
Esrrg	-0.0530883	0.0697234	-0.029907	-0.00969975	-0.00570573	-0.00771152	-0.000235306	-0.031953	-0.00629934
Kctd3	0.0601327	-0.0553382	0.0253588	0.0039901	0.780286	0.00628438	0.00403404	0.0148783	-0.00158732
Cenpf	0.0867373	-0.0532506	-0.0135392	0.00506865	0.0109112	0.00931619	0.00336097	-0.065083	0.0054156
Ptpn14	0.0961038	-0.0656599	-0.00298002	0.0129835	0.0159174	0.0170117	0.00772611	-0.00744514	0.00962348
Smyd2	-0.0159195	0.0404742	-0.0219538	0.00259068	-0.000623538	-0.000595269	-0.00215366	-0.00760275	0.00221773
Prox1	-0.109296	0.127946	-0.065185	-0.0122775	-0.00874201	-0.0146009	-0.0119064	-0.0473601	-0.00939721
Rps6kc1	0.0785044	-0.0770162	0.0359772	0.00419389	0.0079216	0.00751533	0.00542326	0.024043	0.00524347
Angel2	0.102142	-0.0841861	0.0445152	0.0184071	0.0184545	0.0181318	0.0124973	0.00972595	0.0115939
Flvcr1	0.0909674	-0.0894683	0.0894189	0.021649	0.0118954	0.0172041	0.0151487	0.0316873	0.0104093
Tatdn3	0.0217947	-0.00655379	-0.0176597	0.765311	-0.00143481	0.00789332	0.00499616	-0.0254277	0.00311929
Atf3	0.12526	-0.114512	0.118562	0.0169566	0.0166703	0.0265769	0.016906	0.079084	0.0139095
D730003I15Rik	0.0572425	-0.0387857	0.00519455	0.00947854	0.00774651	0.00673848	0.00514403	-0.00799774	0.005899
Nenf	0.218275	-0.0747573	-0.104546	0.013376	0.0257628	0.259987	0.0095971	-0.157929	0.0214579
Pacc1	0.104932	-0.0794011	-0.00213471	0.00772906	0.00891515	0.0095062	0.00826174	-0.0216039	0.00792611
Ppp2r5a	0.0666248	-0.0354366	0.0621705	0.0149927	0.00928069	0.00998375	0.00932423	-0.0105178	0.00706138
Ints7	0.0676485	-0.0409931	0.0186709	0.0110804	0.00785587	0.00911805	0.00874483	-0.0114772	0.0075043
Lpgat1	0.056832	-0.0161866	0.0110651	0.012412	0.0077491	0.00671114	0.00334232	-0.0363909	0.00669065
Slc30a1	0.0617345	-0.0594141	0.0641957	0.00494364	0.00931762	0.0123142	0.0109906	0.0479924	0.00545788
Traf5	0.109251	-0.103943	0.0598356	0.0116174	0.0142663	0.0115391	0.0111425	0.0094334	0.0090131
Rcor3	0.0175622	0.00940446	-0.0223486	0.00844586	0.0055142	-0.000679526	0.000548517	-0.0283407	0.00221074
Hhat	0.201167	-0.162131	0.0241892	0.0260005	0.0290366	0.0257617	0.0196193	-0.0276069	0.0198026
Sertad4	0.345607	-0.256475	-0.00193423	0.0415832	0.0478561	0.0449624	0.026232	-0.0751827	0.0303009
Gm15867	0.286134	-0.218099	-0.015685	0.0293435	0.0347985	0.0339859	0.0223763	-0.0444422	0.0285194
Utp25	0.0474668	-0.042393	0.0557719	0.0108457	0.00871678	0.00549357	0.00371695	0.0284933	0.00216371
A130010J15Rik	0.026957	-0.0256728	0.0111547	0.00279842	0.000532712	0.00451593	0.000273277	0.0194997	0.00171571
Lamb3	-0.0330414	0.0557761	-0.0149427	-0.00312507	-0.00516715	-0.00597794	-0.00414311	-0.0263953	-0.00138431
Hsd11b1	-0.0551518	0.0606641	-0.0146131	-0.00698881	-0.0106206	-0.0117236	-0.00807113	-0.0174172	-0.00604948
G0s2	-0.0403689	0.0682584	0.057557	-0.00494788	-0.00614187	-0.00864721	-0.00314155	0.00552774	-0.00113469
Plxna2	0.0287864	-0.0296282	0.0609152	0.0041961	0.00100188	0.00790927	0.00671162	0.0353633	0.00134894
Cd34	0.274295	-0.166547	-0.0362921	0.0342386	0.0416744	0.0460656	0.0236679	-0.100808	0.0313766
A330023F24Rik	-0.0215093	0.0425436	-0.000566387	0.00479882	-0.00228258	0.00304321	0.000591843	-0.0222499	0.00460105
Cr1l	0.090433	-0.0811687	0.0745141	0.00954588	0.0135862	0.0109551	0.0130418	0.0369532	0.00411902
Fam171a1	0.156643	-0.112946	0.0272278	0.0206022	0.0233965	0.0376074	0.0158754	-0.0186886	0.0153603
Nmt2	0.14761	-0.155071	0.120357	0.0187104	0.018962	0.0209078	0.0214562	0.0530621	0.0132009
Rpp38	0.0546008	-0.0742522	0.0688294	0.00754168	0.00166378	0.00490768	0.00921237	0.0665948	0.00125022
Meig1	-0.0508872	0.0454894	-0.0154241	-0.00801929	-0.0074567	-0.00805332	-0.00453837	-0.0206337	-0.00725196
Hspa14	0.106488	-0.0957572	0.0522173	0.0102118	0.0105101	0.0167243	0.00931545	0.0301814	0.0088158
Cdnf	-0.0413834	0.0546539	-0.0164248	-0.00591812	-0.00171207	-0.00442401	-0.00535065	-0.020207	-0.00302386
Fam107b	0.17339	-0.178474	0.213727	0.0276618	0.0204421	0.0300046	0.0222811	0.0681491	0.013017
Frmd4a	0.103093	-0.11414	0.144923	0.0140172	0.0138083	0.0174096	0.0171539	0.067103	0.00613481
Prpf18	0.059641	-0.0546299	0.084398	0.010759	0.0107438	0.0130721	0.00989039	0.0291077	0.0129574
Sephs1	0.121169	-0.0977324	0.0453209	0.0106215	0.019981	0.021244	0.0184533	-0.00484062	0.0124709
Phyh	-0.326673	0.397686	-0.150828	-0.038557	-0.04143	-0.0467683	-0.038836	-0.0858284	-0.0287162
Optn	-0.0934082	0.111683	-0.0532806	-0.0110418	-0.0127577	-0.0151076	-0.0151345	-0.062074	-0.0111394
Camk1d	0.133477	-0.130873	0.134072	0.0205773	0.0122501	0.0172991	0.017413	0.0379755	0.00570223
Cdc123	0.140034	-0.123503	0.0521316	0.00606677	0.0116063	0.0235928	0.00603861	0.00117822	0.0109552
Nudt5	0.141823	-0.133804	0.108545	0.0219081	0.0244183	0.0181773	0.0185213	0.0384221	0.013516
Sec61a2	0.0430526	-0.0394447	0.0387256	-0.000874057	0.00794659	0.00794	0.00537342	0.0136592	0.000297049
Upf2	0.0708457	-0.0686422	0.0920311	0.0132688	0.00450721	0.0168767	0.00998429	0.0169251	0.0090277
Proser2	-0.0133536	0.0276244	-0.00145833	0.000733132	-0.00148744	-0.0015821	0.00198354	-0.00373816	0.00436757
Echdc3	-0.0798845	0.104312	-0.04287	-0.0149377	-0.0129237	-0.01164	-0.00770162	-0.0442727	-0.00313838
Usp6nl	0.0893099	-0.0828282	0.0561763	0.0145041	0.00881262	0.0119387	0.00758778	0.0109444	0.00581424
Celf2	0.0808814	-0.108082	0.108817	0.0096929	0.0121849	0.00748066	0.011303	0.0828439	0.00881599
Taf3	0.0341193	-0.0417055	0.0843775	0.0068296	0.00597203	0.00622511	0.00792389	0.0299934	-0.00145156
Atp5c1	-0.45095	0.527557	-0.275011	-0.00794784	-0.074042	-0.0826004	-0.0637427	-0.171484	-0.0443277
Kin	0.0634174	-0.063333	0.0444153	0.00875721	0.0101831	0.00918984	0.00422917	0.0285758	0.00749142
Itih5	0.142895	-0.079771	-0.0355467	0.018095	0.0303809	0.0287884	0.0114411	-0.0604345	0.0157922
Pfkfb3	0.166514	-0.154014	0.155226	0.0177256	0.0272963	0.0402277	0.020455	0.0555618	0.0117129
Rbm17	0.169752	-0.19105	0.193659	0.0215817	0.0188436	0.0211262	0.0221018	0.110305	0.00896376
Il15ra	-0.0124546	0.0322726	-0.0048999	0.00233485	0.000123914	-0.00427839	-0.000686863	0.00139415	0.00044723
Fbh1	0.133774	-0.0872591	0.012158	0.013054	0.0171522	0.018087	0.00690376	-0.0200443	0.00873564
Ankrd16	0.0698456	-0.0435119	0.00607747	0.00879038	0.0108137	0.0127741	0.00643249	-0.0231621	0.00819841
Mindy3	0.113151	-0.107382	0.0800593	0.0133899	0.0130494	0.0156228	0.0119564	0.0372245	0.0103736
Pter	0.0385793	-0.0298638	-0.0112158	0.0101121	0.00142011	0.00512622	0.000959777	8.58843e-06	0.00817139
Rsu1	0.28254	-0.25582	0.0935033	0.0266195	0.0328493	0.0371133	0.0266003	0.0239885	0.0178137
Trdmt1	0.0225422	-0.0266764	0.0424864	0.00608982	0.00291738	0.0107866	0.00380953	0.0153914	0.000861309
Vim	0.674129	-0.648638	0.301243	0.0693105	0.0764579	0.133533	0.0647465	0.0413605	0.0406529
Hacd1	-0.0173833	0.0407443	-0.0455952	-0.00878079	-0.00462422	-0.0103251	-0.00419836	-0.00975794	-0.00376417
Stam	0.0827927	-0.0748619	0.0463648	0.0153963	0.0117556	0.0106363	0.0101268	0.0320508	0.00566101
Mrc1	0.30638	-0.283108	0.173168	0.0360454	0.0325606	0.0377827	0.029569	0.013178	0.0211314
Cacnb2	-0.105853	0.107005	-0.0486024	-0.0105041	-0.0144773	-0.0161839	-0.0136326	-0.0147646	-0.00824161
Nsun6	0.0270689	-0.0181626	0.0329958	0.0113652	0.00400717	0.00297662	0.0021624	-0.00267783	0.000406131
Arl5b	0.0532453	-0.0260528	0.0328281	0.0103056	0.00924011	0.0154417	0.0100846	-0.0034869	0.0126683
Plxdc2	0.414052	-0.296642	-0.0229184	0.0427567	0.0559243	0.0501625	0.031967	-0.122399	0.0368924
Nebl	-0.208482	0.254338	-0.123416	-0.0236642	-0.0239198	-0.0276283	-0.0243296	-0.0880494	-0.017973
A930004D18Rik	0.0581815	-0.0463785	0.000677859	0.00253989	0.00556891	0.00635844	0.00372724	-0.00173356	0.00446984
Mllt10	0.0536369	-0.0482338	0.0366193	0.00996251	0.00664487	0.0088281	0.00659911	0.0072691	0.00333833
Dnajc1	0.11528	-0.116467	0.0874316	0.0197468	0.014601	0.0172396	0.0103056	0.0376495	0.00742712
Commd3	0.109083	-0.059006	-0.0181158	0.00742975	0.0133845	0.0089068	0.00633446	-0.0681068	0.00463812
Bmi1	0.0509519	-0.0285456	0.00407427	0.00716235	0.00713081	0.0099305	0.00210759	-0.0129016	0.0025973
Pip4k2a	0.196339	-0.159928	0.0943748	0.0266022	0.0240121	0.032478	0.022395	0.00543039	0.0163425
Msrb2	-0.0599196	0.10413	-0.0777806	-0.0116727	0.545395	-0.0124412	-0.0145658	-0.0802739	-0.00509027
Otud1	-0.0134412	-0.0225485	0.0505887	-0.00221733	0.0018213	-0.00429364	0.0013071	0.159186	-0.00174286
Etl4	-0.0530384	0.0964528	-0.0573408	-0.00532096	-0.00429337	-0.00352507	-0.00651487	-0.0703066	-0.00201029
Arhgap21	0.0388897	-0.0267053	0.0182417	0.00595173	0.00136634	0.0192743	0.00170934	0.00258885	0.00747744
Thnsl1	-0.0173716	0.0265822	-0.0171618	-0.00441009	-0.0014659	-0.00339033	-0.0044617	-0.0170707	0.0020284
Apbb1ip	0.163546	-0.199574	0.353123	0.0296087	0.0219441	0.0292142	0.0263699	0.115578	0.0133754
Pdss1	-0.038636	0.0292188	0.0316684	-0.00290922	-0.00406165	-0.00773813	-0.00115601	0.0152083	-0.00513145
Abi1	0.24589	-0.231947	0.203588	0.0346554	0.0336526	0.0392582	0.034669	0.0403455	0.0204077
Acbd5	0.127592	-0.108592	0.0608929	0.0188864	0.0177589	0.0243365	0.0174003	-0.00391897	0.00901215
Yme1l1	0.0704291	-0.0487411	0.0818349	0.00793653	0.0140228	0.0146073	0.00732101	0.0195317	0.00258646
Spopl	0.0512435	-0.0518489	0.0530253	0.00825194	0.00783282	0.00910215	0.00570502	0.0288571	0.00367049
Hnmt	-0.00356823	0.0138666	-0.00798505	-0.00568189	-0.00529985	-0.000627384	-0.00177723	-0.0239693	-0.00607791
Il1rn	0.110736	-0.177604	0.489683	0.0256288	0.00946082	0.0208064	0.545199	0.143447	0.00519035
Psd4	0.131101	-0.132561	0.188434	0.0217893	0.0128243	0.0225073	0.0208059	0.054782	0.00720024
Ehmt1	0.068269	-0.0567745	0.0417338	0.0100138	0.0105632	0.0112516	0.0102927	-0.00184215	0.00410267
Arrdc1	0.160307	-0.124723	0.0592831	0.021869	0.0196626	0.023504	0.0174003	-0.0228059	0.00993797
Zmynd19	0.0962887	-0.0932131	0.0772043	0.015145	0.0131679	0.0193102	0.0117165	0.0450726	0.0075156
Dph7	0.043566	-0.0485775	0.0239006	0.00326368	0.00588578	0.00605021	0.00442517	0.0227519	-0.000530364
Mrpl41	-0.0573695	0.114504	-0.0454802	-0.00538668	-5.30412e-05	-0.00639632	-0.00670739	-0.0613802	-0.000516668
Pnpla7	0.108629	-0.0740028	0.0212036	0.00736897	0.010787	0.0201322	0.00742076	-0.0449229	0.00742221
Nsmf	0.150347	-0.0869077	-0.00217627	0.021149	0.026856	0.0267757	0.0160469	-0.0338632	0.0176547
Nrarp	0.0374698	-0.0321679	0.0412543	0.00694996	0.00714067	0.0098225	0.00687108	0.0270423	0.00743904
Tor4a	0.118451	-0.0958735	0.0351947	0.0145344	0.0131643	0.0165278	0.0128383	-0.00506424	0.0100784
Nelfb	0.147422	-0.117828	0.0705368	0.0222393	0.0193582	0.0206842	0.0150058	0.0151806	0.00953898
Tubb4b	-0.0206733	-0.0269958	0.112499	-0.00872133	-0.00726211	-0.00115166	0.000785424	0.234921	-0.00766956
Ndor1	0.0878132	-0.0748201	0.0337891	0.0131427	0.0180831	0.0167526	0.0097356	-4.50928e-05	0.00606041
Tmem203	0.095736	-0.0750355	0.0562846	0.0157775	0.0120851	0.00877858	0.0110976	-0.00774807	0.0129706
Tprn	0.0456084	-0.0433257	-0.0036204	0.00514277	0.00338803	0.0020115	0.003586	-0.00242535	-0.000724017
Ssna1	0.207564	-0.144747	0.0343805	0.0294351	0.0310202	0.0292502	0.0187895	-0.0194117	0.0213515
Anapc2	0.211722	-0.164852	0.0682406	0.0220886	0.0249023	0.0241619	0.0202024	-0.0163425	0.0125187
Man1b1	0.180412	-0.127235	0.0408939	0.0228328	0.0240335	0.025152	0.0161556	-0.030592	0.0151749
Dpp7	0.288742	-0.217393	0.0221879	0.0308355	0.0290056	0.0366007	0.0276488	-0.0641012	0.0179243
Uap1l1	0.326518	-0.240831	0.0749399	0.0383265	0.0428869	0.0460096	0.0288315	-0.0681415	0.0277336
Entpd2	0.244004	-0.134176	-0.061857	0.0286164	0.0339928	0.030577	0.0167426	-0.128921	0.0202505
Npdc1	0.453059	-0.351285	0.0409574	0.0497277	0.0597227	0.0562604	0.0398299	-0.0619101	0.0399078
Abca2	0.0361424	0.0147528	-0.0482345	0.0129425	0.00442084	0.000962785	-0.00116576	-0.0509143	0.00772708
Paxx	0.0804836	-0.0381795	-0.01506	0.0156632	0.0107199	0.0130867	0.00577623	-0.01963	0.00782149
Ptgds	-0.326042	0.246373	-0.149199	-0.0462961	-0.0496515	-0.0493268	-0.0414122	0.0511102	-0.0274661
Fbxw5	-0.0145673	0.0788189	-0.0378989	-0.00248229	0.00290297	0.00304431	-0.000230945	-0.0627768	0.00214269
Traf2	0.138198	-0.104008	0.0496198	0.0182027	0.0200954	0.0168102	0.0125026	0.0133202	0.0131214
Edf1	0.252502	-0.153561	-0.0241175	0.0165226	0.0301854	0.0279487	0.0147375	-0.0723066	0.0160139
Phpt1	-0.0672418	0.125098	-0.0624816	-0.00449941	-0.00808121	-0.00396491	-0.00492644	-0.03928	-0.0019332
Rabl6	0.0678854	-0.0384614	0.0162906	0.011717	0.0115135	0.00739695	0.00801188	-0.0216383	0.00511804
Tmem141	-0.0299392	0.0658927	-0.0655638	-0.00240672	-0.0126143	-0.00646775	-0.0107445	-0.0739387	-0.00561872
Fcna	0.0536431	-0.0277701	-0.00832533	0.00863626	0.00943838	0.00881925	0.00245308	-0.0407653	0.00813318
Bmyc	0.155307	-0.120774	0.0061619	0.0149798	0.0166782	0.0223586	0.00890125	-0.013196	0.00771367
Camsap1	0.0418145	-0.0319055	0.0346018	0.584082	0.00160956	0.0117454	0.012736	0.0271377	0.000157126
Ubac1	-0.0318261	0.0545763	-0.0330643	-0.00333089	-0.00567564	0.00188796	-0.00776473	-0.01093	0.000558221
Nacc2	0.103203	-0.0838932	0.0292741	0.014275	0.0108513	0.0120182	0.00643159	-0.00919557	0.00433769
Tmem250-ps	0.0203309	0.0193922	-0.00659665	0.00408755	0.00485256	0.00412245	0.000868821	-0.0375368	0.00490455
Qsox2	0.0336587	-0.0271541	0.0374291	-0.00252139	0.000638793	0.00143085	0.0032678	-0.0091108	-0.00385409
Gpsm1	-0.106795	0.183648	-0.0912157	-0.00546087	-0.0103843	-0.00637772	-0.0119495	-0.0825911	-0.00310013
Dnlz	0.0342538	-0.00494881	-0.0403347	-0.00193247	0.000805498	0.0015733	-0.00339163	-0.0319309	-0.00268708
Snapc4	0.0385707	-0.0219572	0.00678755	0.0025254	0.00697139	0.0107098	0.00269826	0.0102321	0.00591153
Entr1	0.085429	-0.0787338	0.0777212	0.0108676	0.0152979	0.0114259	0.00855608	0.0263317	0.00495248
Pmpca	-0.0396434	0.0789169	-0.0102078	-0.000941434	-0.00259448	-0.00741948	-0.00304186	-0.0175413	-0.00254357
Inpp5e	0.0091149	0.0206695	-0.0203953	0.00461068	0.00610129	0.00458005	-0.00260596	-0.0351915	0.00503155
Sec16a	0.120964	-0.104857	0.0463941	0.00969344	0.0111863	0.638699	0.00908789	0.00370429	0.0104788
Notch1	0.116443	-0.114179	0.141425	0.0202442	0.0183917	0.020244	0.0195894	0.0261328	0.00884343
Egfl7	0.144246	-0.0601409	0.0318193	0.0310292	0.0280613	0.0301889	0.0202804	-0.0521024	0.0198609
Agpat2	-0.0288059	0.0597881	-0.0237917	-0.00502799	-0.00171615	-0.00812057	-0.00605278	-0.0687583	-0.00453411
Dipk1b	-0.022335	0.0572217	-0.0409551	-0.000771573	0.00745997	0.000567362	-0.00551257	-0.0623507	-0.00484044
Surf6	0.0967034	-0.10631	0.112361	0.0142441	0.0135964	0.0180122	0.0142866	0.0387984	0.00558121
Med22	0.0851652	-0.0604256	0.0268115	0.0124171	0.00665436	0.00915581	0.00587578	0.00179398	0.00894782
Rpl7a	0.685829	-0.676389	0.281681	0.0611556	0.0694667	0.0671873	0.0542053	0.146374	0.0363374
Surf1	0.0862417	-0.0495198	-0.0269557	0.00594259	0.00729307	0.00775269	0.0027863	-0.0369436	0.00955446
Surf2	0.0689765	-0.0746644	0.0617058	0.00665616	0.00876822	0.0136117	0.0119626	0.0544288	0.00503258
Surf4	0.435949	-0.379977	0.22526	0.054537	0.0549587	0.0647553	0.0450202	0.0553987	0.0345437
Rexo4	0.109064	-0.0831109	0.0500131	0.0146855	0.0161648	0.011111	0.011306	0.000798692	0.00754255
Cacfd1	0.0872021	-0.0367776	-0.00467373	0.0161187	0.0131881	0.0135535	0.00752018	-0.0498711	0.00597885
Adamtsl2	0.339524	-0.21399	-0.0550827	0.0423136	0.0544695	0.0521393	0.0266047	-0.137395	0.0336211
Dbh	-0.0574286	0.0902126	-0.0456038	-0.00390028	-0.00899439	-0.00984079	-0.00590584	-0.0621974	-0.00440025
Sardh	0.141952	-0.086477	-0.0120248	0.0157713	0.0224652	0.0183907	0.0140245	-0.0612034	0.0122591
Vav2	0.127778	-0.0902715	0.0267872	0.0292953	0.0167942	0.0203269	0.0121396	-0.0209646	0.0102523
Brd3os	0.0698879	-0.0511744	0.0113254	0.00722408	0.0107257	0.0142784	0.00699035	-0.0099486	0.00649419
Brd3	0.116978	-0.0997187	0.0870848	0.0144946	0.0134003	0.0172088	0.0116122	0.00929342	0.00911847
Wdr5	0.101307	-0.118476	0.129366	0.0186953	0.0091231	0.0177904	0.0157479	0.0776185	0.00517755
Rxra	0.115304	-0.0560523	0.014251	0.0198187	0.0146125	0.0209499	0.0136393	-0.0494886	0.0102831
Col5a1	0.768249	-0.578976	0.0120343	0.163454	0.102045	0.0962055	0.0605036	-0.17711	0.0635447
Olfm1	0.253338	-0.230329	0.122502	0.0255016	0.0331364	0.0332907	0.0242004	0.0289633	0.0192659
Mrps2	-0.000436768	0.00323911	0.0101582	0.00103333	-0.000271147	-0.00297802	0.0024507	0.0375079	0.000168225
Ralgds	0.149769	-0.123938	0.0755202	0.0252659	0.0199043	0.0229608	0.0180006	-0.0106444	0.0102596
Gtf3c5	0.0542658	-0.0289972	0.0125331	0.00308963	0.00956343	0.0186655	0.00622038	0.00582748	0.00882029
Tsc1	0.0323826	-0.0134056	0.0161188	0.0105681	-0.000834221	0.003693	-0.000325626	-0.00499076	0.00114653
Gtf3c4	0.10639	-0.0915523	0.036243	0.0142206	0.0202572	0.014698	0.0108161	0.00380121	0.00928737
Ddx31	0.0796829	-0.0789139	0.0675172	0.00786032	0.00914637	0.0172609	0.006676	0.0417792	0.00653306
Ttf1	0.0696938	-0.0693257	0.0700187	0.00870197	0.0124206	0.00734778	0.00741048	0.028596	0.0069448
Setx	0.0814608	-0.0820358	0.105483	0.0144882	0.00884656	0.0112875	0.00973451	0.0212664	0.00967936
Med27	0.0560771	-0.047317	0.0240558	0.00732975	0.00660968	0.00792153	0.00474602	0.0164534	-0.00187401
Rapgef1	0.0617731	-0.0722623	0.0742956	0.0117725	0.00947646	0.0128854	0.00681069	0.106732	0.00529891
Trub2	0.00231111	0.00786289	0.00424737	-0.00420439	-0.00078611	0.0108004	-0.00244366	0.00728132	0.000827725
Coq4	-0.00574438	0.0329921	-0.00735197	0.00450595	0.00417137	0.00331773	0.00127529	-0.0255481	0.0033008
Slc27a4	0.0511041	-0.028137	0.0605316	0.00404797	0.00723656	0.00750505	0.00447373	0.0135704	0.00114068
Urm1	0.121315	-0.0799818	0.0258086	0.0162681	0.0181112	0.0117474	0.0127998	-0.0209352	0.0120401
Cercam	0.363666	-0.258638	-0.0116435	0.0404162	0.0513827	0.0463754	0.0297572	-0.0881066	0.0307825
Odf2	0.0847957	-0.0535153	0.0111956	0.0140637	0.0126566	0.0133435	0.00669826	-0.0092401	0.00962651
Gle1	0.0854937	-0.0572665	0.0102093	0.0114251	0.0105557	0.00960753	0.00722439	-0.0159209	0.00413834
Sptan1	0.23571	-0.176326	0.0716324	0.0375929	0.029798	0.0352692	0.0233594	0.0108612	0.022319
Wdr34	0.0475016	-0.0343542	-0.0034125	0.00131169	0.00360395	0.0038237	0.00243535	-0.016255	0.0022025
Set	0.26999	-0.336143	0.381467	0.0459455	0.0333046	0.0439143	0.0419645	0.20796	0.0139461
Pkn3	0.0747603	-0.0551677	0.00988898	0.0159746	0.00806797	0.0155496	0.0120122	-0.013518	0.00483583
Zdhhc12	0.155832	-0.138928	0.0389561	0.0134644	0.0182262	0.0196234	0.00901472	0.00995547	0.010084
Zer1	0.0364062	0.0132827	-0.0249007	0.0070157	0.00446915	0.00765283	0.00243503	-0.0510738	0.0088886
Tbc1d13	0.123488	-0.0885443	0.0371532	0.0225599	0.0200375	0.0204118	0.0101513	-0.00921085	0.0119415
Endog	-0.155772	0.211298	-0.101552	-0.019932	-0.0196292	-0.023278	-0.0205822	-0.0949121	-0.0119076
Spout1	0.103814	-0.100417	0.0918566	0.01465	0.0152492	0.0141177	0.0129537	0.0459136	0.0114498
Kyat1	-0.0514878	0.083737	-0.0482907	-0.00731197	-0.00743152	-0.00217432	-0.00267177	-0.0486475	-0.00371658
Lrrc8a	0.100723	-0.0693984	0.0399505	0.0145864	0.0167244	0.0172816	0.0146848	-0.00195117	0.00687717
Phyhd1	-0.034158	0.0723578	-0.0483149	-0.00768321	-0.00194551	-0.00973894	-0.00974564	-0.0492991	0.00125153
Dolk	0.00923976	-0.00143883	-0.00636707	-0.00196519	0.668257	-0.000226357	-0.00462351	-0.00534887	-0.00293599
Nup188	0.109829	-0.0903954	0.0495126	0.0163405	0.0127128	0.0284382	0.0133782	0.0114233	0.0166632
Sh3glb2	0.0736139	-0.0172264	-0.0211047	0.0119045	0.00898941	0.0147113	0.001949	-0.0701699	0.00817101
Miga2	-0.078815	0.127147	-0.0553743	-0.0101736	-0.00440962	-0.0026634	-0.00929094	-0.0548785	-0.00256433
Dolpp1	0.102384	-0.080145	0.0379467	0.00888033	0.0116876	0.0122572	0.0116997	-0.00025151	0.00749277
Crat	-0.301585	0.390515	-0.173252	-0.0374696	-0.033878	-0.0399201	0.356132	-0.166221	-0.024227
Ptpa	0.160008	-0.129676	0.0807436	0.015531	0.0199684	0.0282653	0.0150818	0.00466674	0.0134148
Ier5l	0.303853	-0.292033	0.189636	0.0335131	0.0343267	0.0383747	0.0355226	0.0429146	0.0199131
Ntmt1	0.0829586	-0.0525389	0.0301508	0.0118476	0.0133317	0.0152454	0.0109107	0.00873088	0.00407494
Asb6	0.14213	-0.131565	0.0737299	0.0112775	0.0204358	0.0212369	0.0157293	0.0187038	0.00917424
Prrx2	0.210779	-0.164551	-0.000626955	0.0207163	0.02848	0.0210117	0.010904	-0.043892	0.0147168
Tor1b	0.129391	-0.0992061	0.0887424	0.0268939	0.0176016	0.0229752	0.0176391	0.00879578	0.0128246
Tor1a	0.210279	-0.190402	0.0720658	0.017684	0.0228737	0.0250914	0.0197307	0.00505096	0.00859579
BC005624	0.150973	-0.122651	0.0530439	0.0125732	0.017903	0.0170705	0.0148981	-0.0087514	0.0088815
Usp20	-0.0318965	0.0433679	-0.0219571	0.00136314	-0.00518212	-0.000349349	-0.00184649	0.0313294	-0.00395035
Fnbp1	0.13285	-0.098467	0.0737733	0.019381	0.0200824	0.0217675	0.0138064	-0.0277872	0.0121727
D330023K18Rik	0.029917	0.00107282	-0.0262533	0.00457724	0.00768225	-0.00404473	0.00333735	-0.0230536	0.00181858
Gpr107	0.153345	-0.111541	0.0485649	0.0172186	0.0205235	0.0205437	0.0170137	-0.00556707	0.0127974
Ncs1	0.176891	-0.205354	0.154819	0.0249466	0.0191857	0.0249623	0.0239979	0.106096	0.00914941
Hmcn2	-0.052881	0.0792942	-0.0242154	-0.00352698	-4.34223e-05	-0.00592855	-0.000663848	-0.0551926	-0.00145965
Ass1	0.302621	-0.301096	0.16154	0.0297489	0.034284	0.0428102	0.0287683	0.0770594	0.0190471
Fubp3	0.120843	-0.0961198	0.0523073	0.023795	0.0203086	0.0168837	0.0128342	0.00511269	0.0122566
Exosc2	0.0889049	-0.121434	0.0939638	0.0107108	0.00955644	0.0159094	0.0117559	0.0859859	0.00475845
Abl1	0.164343	-0.107099	0.0279462	0.0232991	0.0213712	0.025654	0.0137108	-0.0250991	0.0118645
Nup214	0.0875519	-0.0617061	0.0354092	0.0224924	0.0166298	0.0163848	0.0124872	0.000407729	0.00870439
Fam78a	-0.00429253	0.0337196	-0.0438011	0.00135055	-0.00260518	0.000953683	-0.0018069	-0.0554071	-0.000879754
Plpp7	-0.0453965	0.0770786	-0.0642751	-0.00858575	0.00091647	-0.00634187	-0.00349171	-0.0408619	-0.00590081
Prrc2b	0.0829722	-0.0422271	0.0107246	0.0133774	0.018456	0.0112219	0.00475601	-0.0204317	0.00986409
Pomt1	0.0718461	-0.0506847	-0.00689285	0.0098018	0.00916093	0.0147015	0.00502411	-0.023313	0.00610831
Uck1	0.110265	-0.0803574	0.0284515	0.0120593	0.0180678	0.0149641	0.0112688	-0.00904929	0.00995137
Swi5	0.299291	-0.220335	0.0350868	0.0230174	0.0327999	0.0294166	0.0187049	-0.0434376	0.020851
Golga2	0.101134	-0.0732898	0.0231992	0.0139489	0.011445	0.0137198	0.00973466	-0.000464163	0.00775754
Dnm1	0.107751	-0.0615028	-0.0162326	0.0248027	0.0208295	0.0135451	0.0109777	-0.0452044	0.00743277
Ciz1	0.0868758	-0.0507737	0.0096946	0.0145856	0.0123296	0.0155817	0.00664299	-0.0107595	0.00990058
1110008P14Rik	0.13187	-0.0955522	0.00402325	0.00798558	0.0136808	0.0123717	0.00961485	0.012581	0.0113185
Lcn2	-0.0158739	-0.213512	0.310081	-0.00318924	-0.012255	-0.00377256	0.009371	0.514615	-0.0127602
Ptges2	-0.0740839	0.115886	-0.0462924	-0.00888467	-0.0106587	-0.0088353	-0.00457788	-0.0516163	-0.00669188
Slc25a25	0.0556818	-0.0572799	0.0583174	0.00746886	0.00407846	0.0112065	0.00549752	0.0233603	0.0035908
Fam102a	0.0626566	-0.0387504	0.0308714	0.0106247	0.0114713	0.00370018	0.0101866	-0.00876586	0.00767385
Dpm2	0.268594	-0.21547	0.0792365	0.0275525	0.0356247	0.0404209	0.0252339	-0.0207655	0.0217102
St6galnac4	0.159712	-0.164081	0.125687	0.0251292	0.0220415	0.0295143	0.0196515	0.102212	0.00785379
St6galnac6	0.070604	-0.0185872	-0.0297182	0.0043284	0.0100438	0.0098223	0.00274322	-0.0587059	0.00723288
Ak1	-0.259567	0.403165	-0.230586	-0.0264519	-0.0301708	-0.0356865	-0.0326543	-0.260077	-0.0151651
Eng	0.319982	-0.247204	0.0644267	0.0341181	0.0408964	0.040334	0.0300855	-0.0073867	0.0282551
Fpgs	0.117343	-0.119449	0.0661626	0.015849	0.0198858	0.0164166	0.0114149	0.0453955	0.00811634
Cdk9	0.256387	-0.228024	0.170243	0.0279215	0.0298401	0.0406729	0.0278464	0.0199272	0.0145385
Sh2d3c	0.0393762	-0.028765	0.071499	0.011973	0.00648722	0.0140448	0.0102779	0.0123921	0.00528863
Tor2a	0.305574	-0.253019	0.071219	0.0385898	0.0354579	0.0406181	0.026752	-0.0221424	0.0250278
Ptrh1	0.109929	-0.139416	0.105102	0.00753177	0.0138685	0.0157594	0.014545	0.0989627	0.00734289
Stxbp1	0.0677155	-0.0416075	0.0428472	0.0156535	0.0165509	0.0172597	0.0138126	0.00130808	0.0110779
Fam129b	0.369352	-0.35478	0.282348	0.0466845	0.0446451	0.0570377	0.0467706	0.113955	0.0278445
Lrsam1	0.0493145	-0.0203691	-0.0184993	0.00192168	0.00678929	0.00741634	0.00683881	-0.00740263	0.00216859
Rpl12	0.791543	-0.794639	0.368503	0.0798654	0.0879916	0.0931791	0.0719304	0.190311	0.0450808
Slc2a8	0.0516371	-0.0163913	-0.026567	0.00390589	0.0100489	0.0058288	0.00139206	-0.0414229	0.00835391
Ralgps1	-0.00431181	0.00192296	-0.000970133	0.0058497	0.0013756	0.00410822	-0.000589916	0.020567	-0.00165354
Angptl2	0.340091	-0.235677	-0.00484415	0.0315968	0.0466453	0.0503875	0.0270989	-0.0861662	0.0281477
Zbtb34	0.0688198	-0.0431041	0.0262311	0.0126732	0.00859361	0.0098346	0.0149531	0.0011291	0.00511833
Zbtb43	0.0197144	-0.0119137	0.0121278	0.0105402	0.00657222	0.00329066	0.00875653	0.00873509	0.00192665
Mvb12b	0.111591	-0.0814702	0.0375903	0.0152311	0.0175219	0.0165003	0.0137241	-0.0126762	0.0123189
Pbx3	0.0641549	-0.0539569	0.0293246	0.00945052	0.00826187	0.00719461	0.010816	-0.00042066	0.00767418
Mapkap1	0.0788876	-0.0773437	0.0295885	0.00740799	0.0110394	0.00705357	0.00408129	0.0337741	0.00203406
Gapvd1	0.117832	-0.118835	0.116241	0.0167372	0.0133355	0.0176406	0.0116565	0.0419168	0.00677874
Hspa5	0.151238	-0.210905	0.451574	0.035027	0.0175583	0.0370093	0.0351075	0.277848	0.00851896
Rabepk	0.0918642	-0.0813526	0.0518916	0.0124618	0.0146371	0.0140103	0.0116235	0.0121205	0.0057014
Fbxw2	0.109966	-0.0836339	0.0410879	0.011943	0.0152213	0.0154492	0.0110925	0.0022586	0.00879571
Psmd5	0.0982174	-0.0873637	0.0702325	0.0156483	0.00676818	0.0148602	0.0107385	0.0228346	0.0124533
Traf1	0.140225	-0.136758	0.110194	0.019379	0.0198437	0.0233057	0.0164738	0.016861	0.0112377
Cntrl	0.0845262	-0.0739128	0.06573	0.0154299	0.0178264	0.0121871	0.00959659	0.00335326	0.00513015
Rab14	0.130181	-0.103992	0.106224	0.0151851	0.0178371	0.0142425	0.0154619	0.0254734	0.00767886
Gsn	-0.137145	0.323743	-0.155242	0.00132206	-0.00164946	-0.00194502	-0.0142298	-0.257119	0.153828
Stom	0.00945865	0.0503837	-0.0619297	0.000413605	0.000203005	0.000285016	-0.00290092	-0.105077	-0.000372982
Ggta1	0.199705	-0.170914	0.0745126	0.0224403	0.0236145	0.0216497	0.0212911	0.000180856	0.0140149
Dab2ip	0.085019	-0.0526942	0.0121914	0.0126437	0.00835801	0.0133952	0.00523972	-0.0108934	0.0108223
Ndufa8	-0.310371	0.370787	-0.229158	0.0638845	-0.0575854	-0.059882	-0.04873	-0.194644	-0.0356287
Rbm18	0.0583287	-0.0703063	0.0856194	0.0136531	0.00985804	0.00912654	0.00812536	0.0754265	0.0015037
Mrrf	-0.00141025	0.00613457	0.0167858	-0.00216015	-0.00221045	0.00185007	0.000503988	0.0177621	-0.00110298
Ptgs1	0.102473	-0.0768836	0.0744569	0.0217129	0.017366	0.0165599	0.0120855	-0.0177463	0.011149
Pdcl	0.0781139	-0.0627441	0.0479513	0.0128346	0.0141437	0.0137699	0.0093246	0.010429	0.00562922
Rc3h2	0.0632789	-0.0394933	0.0499545	0.0122859	0.0105938	0.0143696	0.00849894	-0.00752517	0.0053689
Zbtb6	0.0814158	-0.0660974	0.0592003	0.0141146	0.0106055	0.0121885	0.00828251	0.00674088	0.00867915
Rabgap1	0.0522718	-0.0295458	0.0407392	0.00987519	0.00641154	0.0130969	0.00624613	-0.00446212	0.0109114
Strbp	0.088748	-0.0585184	0.0164941	0.012766	0.0141129	0.0077911	0.0057657	-0.0193314	0.0136943
Dennd1a	0.122924	-0.0823055	0.0303958	0.0167494	0.0166826	0.0143019	0.0141977	-0.0314693	0.0108813
Nek6	0.361799	-0.331517	0.259802	0.0429076	0.0416296	0.0444074	0.039737	0.022237	0.0237345
Psmb7	0.0592337	-0.0648718	0.0358844	-0.00378693	-0.00403098	-0.000269799	0.000310526	0.0591622	0.000131176
Olfml2a	0.0609274	-0.0377218	0.0111633	0.013597	0.0125545	0.0140769	0.00642786	-0.0239232	0.00636704
Rpl35	0.6165	-0.576788	0.145486	0.049605	0.135633	0.0588683	0.0434804	0.0630484	0.0293973
Arpc5l	-0.0216661	0.0532958	-0.0432337	-0.00895567	-0.00458356	-0.0115248	-0.00551668	-0.0437727	-0.00369848
Golga1	0.0272294	-0.00460065	0.0170977	0.00679891	0.00354974	0.00685288	0.0075084	0.000302857	0.00524021
Scai	0.0445149	-0.0305021	0.0110411	0.0065903	0.00745998	0.00566497	0.00125809	0.00228463	0.00477894
Ppp6c	0.060007	-0.0354414	0.0506746	0.015927	0.00816703	0.00887299	0.00712688	0.0238563	0.00789869
Gtdc1	0.0409143	-0.0379173	0.0164458	0.000769535	0.00321434	0.00627143	0.00247655	0.0103055	-0.00222962
Zeb2	0.259092	-0.279522	0.289342	0.0386088	0.0384935	0.0359215	0.0308688	0.101287	0.0184033
Zeb2os	0.151007	-0.126463	0.0634927	0.0152356	0.0146301	0.0157988	0.016442	-0.0153866	0.00840927
Acvr2a	0.015677	-0.0138305	0.0168019	0.00206124	0.00767103	0.00181598	0.000782665	0.0229324	-0.000866593
Orc4	0.0404256	-0.0235531	0.0419188	0.00632008	0.00336915	0.0114821	0.00175616	0.0241089	0.00234609
Mbd5	0.0617234	-0.0562013	0.0242583	0.00783151	0.00747655	0.00686944	0.00575046	0.00684376	0.00423218
Epc2	0.0889524	-0.0752835	0.0869266	0.0146193	0.0152854	0.0154934	0.00788256	0.00670588	0.00826088
Mmadhc	-0.039331	0.0438445	0.0145583	-0.00525075	-0.00720166	-0.0113323	-0.00666757	0.0249833	-0.00476039
Rnd3	0.114641	-0.0921617	0.0403023	0.0158523	0.0176211	0.021175	0.0129317	-0.00128954	0.0119864
Rbm43	0.113863	-0.0942716	0.0348332	0.0097484	0.0184769	0.0166018	0.00962403	-0.00876317	0.00693456
Nmi	0.146568	-0.122918	0.056801	0.0151822	0.0121922	0.0212139	0.0129413	-0.00329611	0.00834824
Tnfaip6	0.159337	-0.17277	0.184345	0.0264887	0.0243535	0.0279987	0.0224803	0.087091	0.0125501
Rif1	0.033693	-0.0499829	0.0937686	0.0112663	0.0110374	0.0148178	0.00589081	0.0389086	0.00578735
Arl5a	0.115475	-0.109249	0.0879751	0.0153841	0.0157116	0.0203631	0.0121102	0.0529981	0.00656442
Stam2	0.117529	-0.103217	0.0694687	0.012007	0.008017	0.0185378	0.0148233	0.0161469	0.00564763
Fmnl2	0.142899	-0.147824	0.148391	0.0265425	0.0180418	0.0274531	0.0199261	0.0344651	0.0105825
Prpf40a	0.140666	-0.178817	0.221278	0.0204147	0.0192247	0.0238462	0.0233935	0.109628	0.00687265
Arl6ip6	0.0889552	-0.0748089	0.0723049	0.014091	0.00921698	0.0119352	0.00560173	0.00785634	0.00582116
Kcnj3	-0.12142	0.167833	-0.072708	-0.0151654	-0.0188164	-0.0161913	-0.0163141	-0.094461	-0.00950949
Gpd2	0.0484309	-0.0551897	0.0914041	0.0101451	0.00678314	0.00751878	0.00946658	0.022151	0.000774852
Cytip	0.191133	-0.203989	0.309482	0.0281431	0.0194492	0.0292879	0.0243929	0.0857779	0.015906
Acvr1	0.169421	-0.13276	0.0346153	0.0297993	0.0156772	0.0241868	0.0138519	-0.0101493	0.0243069
Upp2	0.110421	-0.072641	-0.02054	0.00946033	0.00715989	0.00872741	0.00510926	-0.0407005	0.0108134
Pkp4	-0.02708	0.053849	-0.0258612	-0.00296073	-0.00234451	-0.00390173	-0.00265192	-0.0258591	-0.00319945
Tanc1	0.0501828	-0.0300075	0.00917594	0.010143	0.00749823	0.0117397	0.00967493	-0.0168125	0.00257431
Wdsub1	0.05854	-0.0351935	-0.0160292	0.00314891	0.0110388	0.00331205	0.00455862	-0.0238744	-0.000922704
Baz2b	0.0842688	-0.0772377	0.106256	0.0114229	0.0130965	0.0110174	0.014686	0.0142363	0.00718552
2021-03-07	0.0488089	-0.0531036	0.132767	0.00832709	0.00967331	0.0153082	0.011148	0.0353689	0.00329374
Cd302	0.387682	-0.289998	0.0300438	0.0403005	0.0511066	0.0397481	0.0320977	-0.0838527	0.028242
Pla2r1	0.103587	-0.0753054	-0.000823516	0.0106014	0.0129499	0.0131843	0.00602961	-0.0292023	0.00890851
Itgb6	-0.0811165	0.10249	-0.0540962	-0.00840106	-0.0111044	-0.0143498	-0.0104401	-0.0570772	-0.00842904
Rbms1	0.206811	-0.280152	0.460893	0.0424638	0.0270096	0.0396826	0.0387294	0.163123	0.0106323
Tank	0.129407	-0.128623	0.111841	0.0124009	0.0146347	0.0198223	0.0148777	0.041713	0.00804145
Psmd14	0.160986	-0.199894	0.162654	0.0180778	0.0179429	0.0248407	0.0196673	0.134114	0.00567751
Fap	0.213013	-0.150265	-0.0159488	0.0233437	0.0298825	0.0273571	0.0154833	-0.0701664	0.0172425
Ifih1	0.200171	-0.158362	0.0660923	0.0219467	0.0219945	0.0224171	0.0215546	-0.0281637	0.0140655
Gca	-0.0519539	0.0669572	-0.0226025	-0.00450817	-0.00954546	-0.00925661	-0.00652003	-0.0249558	-0.00717629
Fign	-0.0503936	0.0562864	-0.0232806	-0.00817679	-0.00438625	-0.00642351	-0.00564042	-0.00820421	-0.00178041
Grb14	-0.127509	0.181216	-0.133008	-0.0199983	-0.0260373	-0.0255994	-0.0233161	-0.143209	-0.0104238
Cobll1	-0.0418081	0.0584193	-0.0149896	-0.00729312	-0.00987869	-0.00129829	-0.00396357	-0.0170777	-0.00428125
Gm13594	-0.0827827	0.111065	-0.0611099	-0.0143427	-0.0118518	-0.0102735	-0.0132229	-0.058005	-0.00802441
Ttc21b	0.0346288	-0.0248299	0.0163063	0.00378107	0.00353504	0.00543534	0.00225418	-0.00453224	0.00195886
Scn7a	0.0788593	-0.00763263	-0.0366824	0.0185389	0.020575	0.0139115	0.00476125	-0.0706157	0.0142402
Xirp2	0.0485328	-0.331754	0.290426	0.000109688	0.0797315	0.00330136	0.0101831	0.779613	-0.0115842
Stk39	-0.0275425	0.0532145	-0.0303235	-0.00289567	-0.00337738	-0.00249827	-0.00448667	-0.0183307	-0.00192633
Cers6	0.20599	-0.185981	0.140005	0.026367	0.0260771	0.0245373	0.0209273	0.00680072	0.0132242
Nostrin	0.0383739	-0.0208837	0.00629424	0.00744192	0.00380743	0.00875031	0.00772237	-0.00505939	0.000105587
Spc25	0.110679	-0.0953985	0.0137612	0.0104332	0.0080095	0.0139688	0.00749735	-0.0320375	0.00511769
Bbs5	0.037012	-0.0327057	0.00998839	-0.000869322	0.00470346	0.00419743	0.00372135	-0.00845961	0.0105139
Klhl41	-0.0498156	-0.100836	0.20849	-0.00504353	-0.0120363	-0.00252127	0.00423524	0.495149	-0.00675389
Fastkd1	-0.029186	0.0298633	-0.00306557	-0.00669324	-0.00274126	-0.00661714	-0.00502114	0.00761404	-0.00530182
Ppig	0.117299	-0.161712	0.245944	0.0204336	0.0142698	0.0176625	0.0207141	0.0884844	0.00662989
Phospho2	0.0301875	-0.0218833	0.0126025	0.00476296	0.000281419	-0.000413149	0.000465294	0.00600238	0.00515578
Klhl23	-0.0529482	0.0947692	-0.0548874	-0.00549536	-0.00300424	-0.00535507	-0.00641434	-0.0743219	-0.00366902
Ssb	0.16143	-0.192494	0.215322	0.0223441	0.0212485	0.0279042	0.022774	0.123746	0.0106526
Mettl5	-0.00600225	0.0186778	0.0116489	-0.00144127	-0.00344894	-0.00362467	-0.00531568	-0.0108952	-0.000563454
Ubr3	-0.0626929	0.0882092	-0.0352774	-0.00741308	-0.00592165	-0.00739824	-0.00739544	-0.0140573	-0.00287708
Gorasp2	0.229799	-0.210651	0.148434	0.0321359	0.0313151	0.0363033	0.0242492	0.0742441	0.0181971
Tlk1	0.0828755	-0.0466124	0.0270646	0.0150095	0.00981709	0.00846665	0.0052795	-0.0145101	0.00458058
Mettl8	0.0438461	-0.0314063	0.0273284	0.00693989	0.00175159	0.00492366	0.00840226	0.00695975	0.00828659
Dcaf17	0.0641224	-0.0539749	0.0207893	0.0102766	0.010973	0.00701999	0.0039298	-0.00199317	0.00669417
Dync1i2	0.172772	-0.179128	0.171838	0.0248419	0.0227692	0.0259711	0.0215806	0.0799804	0.0122437
Slc25a12	-0.163933	0.216771	-0.0883714	-0.0188493	-0.0243772	-0.0184247	-0.0247846	-0.0860428	-0.0134907
Hat1	0.0535525	-0.0502841	0.0690563	0.0109504	0.00363592	0.010344	0.0073369	0.0213432	0.00209672
Metap1d	-0.0208327	0.0652871	-0.036666	0.00445064	0.00373291	0.00181838	-0.00347573	-0.0473746	0.00347759
Itga6	0.0882301	-0.0444446	0.0513391	0.0151947	0.0164036	0.0140207	0.011667	-0.0253201	0.010717
Pdk1	-0.0672524	0.0663147	0.0159557	-0.00671082	-0.00334624	-0.00790164	-0.00743531	0.0440652	-0.00528321
Rapgef4	-0.0286232	0.0197104	0.0150024	0.00111235	-0.0041531	-0.00230755	-0.000656456	0.024587	-0.00289883
Map3k20	-0.107115	0.0550564	0.0739028	-0.0124563	-0.0102283	-0.0108362	-0.00474769	0.239923	-0.00942757
Cdca7	0.0743229	-0.0729882	0.0871474	0.00912297	0.0111699	0.0102212	0.0127669	0.0363391	0.011098
Sp3	0.062959	-0.0605546	0.0583579	0.0071735	0.00527997	0.00883575	0.00585514	0.00470821	0.842748
Sp3os	0.000702245	0.0201522	-0.0244121	-0.00401012	0.00141815	0.0034397	-0.0058029	-0.0135085	-0.00174898
Ola1	0.0977375	-0.0853169	0.0817783	0.0139041	0.0113896	0.0130838	0.0137506	0.0313737	0.0116919
Cir1	0.0677239	-0.0525418	0.0480824	0.00820647	0.00394335	0.00649681	0.0082872	-0.0102208	0.00739154
Scrn3	-0.0241382	0.0383565	-0.00934648	-0.00485626	-0.00665442	-0.00629544	-0.00394153	-0.0261912	-0.00517802
Gpr155	-0.00471963	0.0263466	-0.0195926	-0.00370318	0.0066338	-0.00448979	-0.00263059	-0.0363528	-0.00228542
Wipf1	0.265298	-0.255941	0.249706	0.0419477	0.0291372	0.036876	0.03803	0.0333119	0.0203105
Chn1	-0.00176888	0.0146276	-0.0142837	-0.00152028	0.00749205	-0.00132162	0.00167488	-0.0052378	0.00389649
Atf2	0.0954339	-0.0807096	0.052197	0.0133288	0.0105627	0.0144111	0.010126	0.00432445	0.00357151
Atp5g3	-0.631413	0.750486	-0.325451	-0.0807826	-0.0830111	-0.0908227	-0.0787576	-0.256231	-0.0564283
Lnpk	0.0349617	-0.0334263	0.0394697	0.00630953	0.00993721	0.0054505	0.00348601	0.0240906	-0.000327046
Mtx2	-0.0481887	0.0777221	-0.0458593	-0.0118307	-0.0101912	-0.00838109	-0.0102004	-0.0204964	-0.00229758
Hnrnpa3	0.31267	-0.377544	0.36577	0.0433236	0.034677	0.0448715	0.0445864	0.218925	0.0162781
Nfe2l2	0.227664	-0.209019	0.17705	0.031148	0.0257942	0.0335418	0.0275555	0.067038	0.0178686
Agps	0.151632	-0.152204	0.124025	0.0159703	0.0175779	0.0174188	0.0141426	0.0597866	0.00886773
Ttc30b	0.00935796	0.0119754	-0.0212336	-0.00153812	-0.00279144	-0.000315623	-0.000612493	-0.0362972	0.00445712
Ttc30a1	-0.00146603	0.00410488	0.00341003	0.00294799	-0.00552023	0.002487	0.00102992	0.00575809	-0.00133194
Rbm45	0.021224	-0.0137721	0.0469483	0.00636742	0.00561241	0.0131705	0.0104675	0.0180927	0.00389208
Osbpl6	-0.038297	0.0527462	-0.0406256	0.000281146	-0.0075202	-0.00527269	-0.00327803	-0.0283686	-0.00507456
Prkra	0.104014	-0.0708331	0.0201048	0.0113913	0.0109884	0.0118481	0.00752243	-0.0218693	0.00939982
Fkbp7	0.361761	-0.254433	-0.00880233	0.039449	0.0472752	0.0421086	0.0276282	-0.104013	0.0312939
Plekha3	0.12359	-0.116129	0.106583	0.0138351	0.017566	0.0209841	0.0158965	0.0300328	0.00684349
Ttn	-0.504705	0.383093	-0.190547	-0.0116975	-0.0821125	-0.0878672	-0.0700158	0.144827	-0.0556966
Ccdc141	-0.152268	0.188293	-0.0963102	-0.0166132	-0.017098	-0.0209089	-0.0190379	-0.0814651	-0.0144532
Sestd1	0.0758668	-0.0629501	0.056117	0.0100188	0.011459	0.015252	0.0105077	0.0163323	0.00196572
Zfp385b	-0.00946112	0.0124241	-0.0186858	-0.00459077	-0.00278412	0.00212445	0.00261781	0.00271982	0.000545701
Cwc22	0.0808866	-0.0804137	0.0634972	0.0132416	0.0117217	0.00920409	0.0139622	0.0278568	0.00145494
Ube2e3	0.0869604	-0.0357539	0.00606936	0.00699264	0.0113672	0.0118642	0.00567098	-0.0563674	0.0111557
Itga4	0.166151	-0.150506	0.0995795	0.0144062	0.0188302	0.0202413	0.0149191	0.0042413	0.00857172
Itprid2	0.240891	-0.191415	0.065843	0.0311827	0.0311729	0.0330793	0.0266612	-0.0335028	0.0183169
Pde1a	0.199062	-0.179196	0.10248	0.029806	0.0277346	0.0298925	0.0211748	0.0155179	0.0158485
Dnajc10	0.272104	-0.224061	0.0748082	0.0292057	0.033483	0.0407056	0.0269154	-0.0153305	0.0193347
Frzb	0.503146	-0.383768	0.00630652	0.0538712	0.064903	0.0593554	0.0382281	-0.0986602	0.0426308
Nckap1	0.14494	-0.152258	0.0993883	0.0173898	0.0183894	0.026991	0.0161163	0.0887332	0.00931888
Dusp19	0.0442073	-0.0279475	-0.0145243	0.00148587	0.00132287	0.00202134	-0.000308682	-0.0241298	0.000336771
Nup35	0.0680623	-0.0665869	0.0282171	0.00605426	0.0105865	0.00534069	0.00719455	0.0183171	0.00653781
Zc3h15	0.166351	-0.198924	0.208837	0.0245656	0.0154596	0.0232007	0.0224247	0.0977697	0.00680325
Itgav	0.295243	-0.218422	0.141332	0.0500651	0.0502994	0.0556327	0.0342764	0.00273221	0.0280269
Calcrl	0.0873598	-0.0670023	0.0586796	0.0247908	0.015785	0.0185794	0.010205	0.00361155	0.00700065
Tfpi	0.0598811	-0.0252766	0.0170498	0.0071177	0.00531969	0.0124476	0.00531344	0.00106405	0.00428691
Ctnnd1	0.207375	-0.173832	0.0788036	0.0219739	0.0245936	0.0289072	0.0193107	0.00753939	0.0163245
Selenoh	0.300337	-0.219772	-0.00497028	0.031793	0.034561	0.034548	0.0220245	-0.0932985	0.0167775
Tmx2	-0.0999077	0.129275	-0.0567478	0.285424	-0.012845	-0.0055974	-0.0112909	-0.0298771	-0.00714244
Med19	0.0542516	-0.0629318	0.0682294	0.00865816	0.00539557	0.00860029	0.00526686	0.0284989	0.000862895
Zdhhc5	0.0923699	-0.0907944	0.0493364	0.00740231	0.0115616	0.00808437	0.00578196	0.051084	0.00979292
Clp1	0.0933243	-0.0905204	0.0882409	0.0118037	0.0130583	0.00749885	0.0128317	0.0243363	0.00568034
Serping1	0.578308	-0.406541	-0.0376494	0.064572	0.0745868	0.0660669	0.0418075	-0.196114	0.0468224
Ube2l6	0.366848	-0.292429	0.0953973	0.0335262	0.0401107	0.0395965	0.030872	-0.0613433	0.0202083
Timm10	-0.0760585	0.0756009	-0.0044876	-0.0142671	-0.0130244	-0.00816435	-0.00939872	0.0569754	-0.00433019
Slc43a3	0.205552	-0.122111	-0.0180542	0.0260445	0.0299766	0.0351706	0.0135478	-0.0882394	0.0215961
Ssrp1	0.206367	-0.183771	0.119412	0.397448	0.0253606	0.0300991	0.0261573	0.0253719	0.0166123
Tnks1bp1	0.165154	-0.114104	0.0286067	0.0190549	0.025986	0.0244456	0.0203232	-0.0315748	0.0195602
Aplnr	0.123641	-0.0563572	-0.0358249	0.0203177	0.0250132	0.0227498	0.016718	-0.0708076	0.0121112
Olfr1033	0.0457228	-0.0300192	0.0211349	0.0170206	0.00812996	0.0102123	0.00718724	-0.0246421	0.00115461
Ptprj	0.207053	-0.183966	0.0913272	0.0284148	0.0295834	0.0296536	0.0201364	0.00736738	0.014876
Nup160	0.0742651	-0.0771556	0.0734441	0.012796	0.0077427	0.00918941	0.00953854	0.0365281	0.0101597
Fnbp4	0.0824692	-0.0592323	0.0241175	0.0169329	0.0160817	0.0116002	0.00751615	-0.00370392	0.00734633
Mtch2	-0.0197507	0.0510016	-0.00591248	-0.00734276	-0.00549785	-0.00844222	-0.00349733	-0.0124683	-0.00472066
C1qtnf4	-0.0951423	0.121209	-0.0552244	-0.0106787	-0.0136505	-0.0150177	-0.0143407	-0.0605104	-0.0112353
Ndufs3	-0.290232	0.361857	-0.171453	-0.0494054	-0.044875	-0.0473685	-0.0404354	-0.141019	-0.0236656
Kbtbd4	0.0186439	0.00417138	-0.0207733	0.000939837	0.00461832	0.00283716	-0.00240548	-0.0196247	0.00284688
Ptpmt1	0.0844816	-0.0721266	0.0343651	0.0084938	0.00909705	0.00790862	0.00246074	0.0169928	0.00143869
Celf1	0.0193903	-0.0242313	0.118509	0.012154	0.00879129	0.0172132	0.0110232	0.0666055	0.0045081
Rapsn	0.0504203	-0.0207793	-0.0282926	0.00281907	0.00453553	0.00240438	0.000356511	-0.0375195	0.00422431
Psmc3	0.0790782	-0.0385139	0.0526763	0.0121317	0.0122354	0.0104463	0.00841634	0.00440648	0.0086493
Slc39a13	0.220989	-0.18027	0.0485111	0.0268713	0.0264873	0.0346386	0.0167427	0.0251946	0.0159318
Spi1	0.467872	-0.426166	0.283511	0.453733	0.0480141	0.0561579	0.0485648	0.0149575	0.0278453
Mybpc3	-0.391553	0.575919	-0.327592	-0.0282415	-0.0297005	-0.0386019	-0.0423725	-0.299161	-0.0136871
Madd	0.132228	-0.102281	0.0534666	0.0111352	0.0198394	0.0215528	0.0102482	-0.0102916	0.00706272
Nr1h3	0.0303637	-0.0196271	0.0273154	0.00460921	0.00483366	0.00602902	0.00093031	0.0200901	-6.95166e-05
Acp2	0.182149	-0.148882	0.0639001	0.0227963	0.0232491	0.0206698	0.0131695	-0.0179613	0.0114496
Pacsin3	-0.0750262	0.0624685	-0.0580582	-0.00898065	-0.00787339	-0.00444296	-0.00555297	0.120381	-0.00142917
Arfgap2	0.0356079	0.0152952	0.0229671	0.0104086	0.00989087	0.0188738	0.00430203	-0.0185693	0.00983625
1110051M20Rik	0.0770705	-0.0477671	-0.0163504	0.0112775	0.00838995	0.0110302	0.000236417	-0.0347853	0.00149908
Ckap5	0.0664262	-0.0419266	0.0172576	0.00541102	0.00604891	0.00736471	0.00216348	-0.0186285	0.00462413
Arhgap1	0.247953	-0.214918	0.0684935	0.0279986	0.0323737	0.0340955	0.0256374	0.017268	0.0182391
Atg13	0.0526667	-0.0491228	0.0371624	0.00903841	0.00745263	0.00858856	0.00449561	0.0455908	0.00812966
Harbi1	0.015709	-0.0208338	0.0141619	0.00376153	0.00410639	-0.00014911	0.00265014	0.0286666	-0.000242449
Ambra1	0.0603087	-0.0451267	0.0583164	0.0166501	0.00719162	0.0111933	0.00714417	0.0273933	0.00742595
Mdk	0.527462	-0.387312	-0.00219107	0.0619146	0.0681279	0.0701859	0.0424813	-0.121266	0.046642
Dgkz	0.148447	-0.125202	0.123119	0.0177862	0.0239828	0.0330251	0.0163213	0.00976368	0.0144576
Creb3l1	0.31005	-0.263869	0.125354	0.0375548	0.0429148	0.0445964	0.0326836	0.00205933	0.0207957
Phf21a	0.114255	-0.0999372	0.092801	0.0137754	0.0172707	0.0174409	0.015166	0.0195364	0.0102722
Pex16	0.00873763	0.00931623	-0.0206537	0.00437383	0.0055952	0.00236401	-0.00158768	-0.0198338	0.000841448
Mapk8ip1	0.0825256	-0.0573774	-0.00952956	0.0111913	0.0149567	0.0124647	0.00822325	-0.0338997	0.00972315
Cry2	0.0104271	0.00922887	-0.00687572	0.00612983	0.00382946	-0.000332192	-7.77233e-05	0.00451889	0.000678405
Slc35c1	0.134735	-0.124815	0.067483	0.0136824	0.014655	0.0198736	0.0147838	0.0258732	0.0127188
Chst1	0.11219	-0.166817	0.228597	0.0202957	0.0176292	0.0207419	0.0221349	0.132341	0.00715281
4631405J19Rik	-0.0830992	0.105311	-0.0613015	-0.0100131	-0.0133149	-0.0119621	-0.0107921	-0.0519539	-0.00733635
Trp53i11	0.141072	-0.135227	0.197642	0.0289929	0.0273941	0.0312194	0.0265192	0.0967082	0.0148763
Tspan18	0.0873247	-0.0378547	-0.0230919	0.0243164	0.0159469	0.0147291	0.00637499	-0.0593311	0.00870407
Cd82	0.232916	-0.205121	0.118477	0.0320045	0.0237032	0.0335295	0.0250056	-0.00457551	0.0158005
Ext2	0.203008	-0.163716	0.0304875	0.0196292	0.0194371	0.611905	0.0129494	-0.0236676	0.0150595
Accs	0.0773011	-0.0426983	-0.0207046	0.0117114	0.007506	0.0114631	0.00417996	-0.0404423	0.00674258
Gm13889	0.213685	-0.3088	0.226686	0.0257972	0.023453	0.0280644	0.0243666	0.31821	0.0138106
Alkbh3	0.00742779	-0.00560235	-0.00870912	-0.00327033	-0.00158132	-0.00346843	-0.00305531	0.0148596	-0.0034054
Hsd17b12	0.172816	-0.17036	0.130345	0.0238955	0.0258446	0.0306652	0.0205857	0.0640696	0.0099579
Ttc17	0.0671431	-0.0386009	0.027746	0.00915772	0.0040005	0.00750206	0.00749104	-0.00372411	0.0044793
2810002D19Rik	0.0364155	-0.0207362	-0.00092442	0.00277151	0.0056972	0.00797303	0.000539747	-0.0103221	0.00211057
Api5	0.147559	-0.144429	0.125641	0.0223914	0.0216211	0.029887	0.017353	0.0403088	0.0152497
B230118H07Rik	-0.108357	0.136776	-0.0840776	-0.0163037	-0.0206853	-0.0165947	-0.0171202	-0.0664668	-0.0102911
Traf6	0.0620933	-0.0720627	0.112355	0.00901772	0.012202	0.0101515	0.00784845	0.0454527	0.00388625
Commd9	0.124717	-0.0780005	0.0120356	0.0184536	0.0177435	0.0146167	0.0102183	-0.0318016	0.0105756
Ldlrad3	0.0939496	-0.0749266	0.0157705	0.00913837	0.0157197	0.0140958	0.00697598	-0.0167608	0.00776954
Trim44	0.124082	-0.111893	0.0831131	0.0193725	0.0187567	0.0211397	0.0149878	0.0323586	0.0102383
Pamr1	0.134274	-0.0996054	-0.0168926	0.0146191	0.0160865	0.0152367	0.00732888	-0.0421446	0.912134
Cd44	0.25676	-0.335807	0.576106	0.0479711	0.0329714	0.0483504	0.052364	0.265016	0.0169171
Pdhx	-0.160042	0.197835	-0.0999477	-0.02347	-0.0207938	-0.0200904	-0.0194895	-0.0603836	-0.0133379
Apip	-0.0617946	0.108657	-0.0705747	-0.0103966	-0.0114284	-0.0151196	-0.0124238	-0.0904688	-0.00414212
Cat	-0.0679765	0.135683	-0.071903	0.200615	-0.00915648	5.21657e-05	-0.00797411	-0.0568666	-0.00209486
Abtb2	-0.000630556	0.00895465	0.0327623	0.000427007	0.000325179	0.00527	0.00200507	0.0261025	0.00211367
Nat10	0.0773375	-0.0782338	0.0709333	0.00871695	0.0150707	0.0229783	0.00934112	0.0323571	0.00627684
Caprin1	0.164363	-0.144601	0.134699	0.0224652	0.0216221	0.0240977	0.0181085	0.0231647	0.0104331
Lmo2	0.212216	-0.175968	0.0467971	0.0145173	0.0219659	0.0238674	0.01874	-0.0140658	0.010358
Fbxo3	-0.0240249	0.0749654	-0.00319472	0.0020659	-0.00235685	0.00109587	-0.00247721	-0.048581	-0.000986218
Cd59b	0.0179152	0.00288727	-0.0313969	-0.0017739	0.00162959	-0.00752009	-0.00291701	-0.0412714	0.000523996
Cd59a	-0.075906	0.101698	-0.0940403	-0.0177813	-0.0146149	-0.0233329	-0.0156943	-0.075213	-0.0109173
Hipk3	-0.0319152	0.0643423	0.0120171	0.00415272	0.000326423	-0.00316541	-4.84964e-05	0.0179747	-0.00419305
Cstf3	0.0766309	-0.0733471	0.0593824	0.00994844	0.0117685	0.0157839	0.00541576	0.0291263	0.00824973
Tcp11l1	0.0742849	-0.0796776	0.0450432	0.00461469	0.0049452	0.00380389	0.00273585	0.0246781	-0.00144701
Qser1	0.0446036	-0.0343516	0.0340849	0.00833034	0.0128951	0.00707775	0.00351244	0.00615886	0.00552647
Ccdc73	0.0341885	-0.0274144	-0.0124776	-0.00143152	-0.000310848	0.000719754	-0.000283639	-0.0275137	0.904635
Eif3m	0.100303	-0.103132	0.100001	0.00552101	0.00613948	0.00931286	0.0109649	0.0674295	0.00388922
Wt1	0.0373748	-0.0125577	0.0142231	0.00699956	0.0135527	0.00577832	0.0060009	-0.0215175	0.00577323
Rcn1	0.493371	-0.385597	0.0566863	0.0498244	0.0648791	0.0653188	0.0419545	-0.0752575	0.0380301
Elp4	0.0289688	-0.019683	0.0174779	0.000877488	0.00118627	0.00474891	0.00120672	0.0114712	-0.00106889
Immp1l	-0.0397766	0.0621195	-0.0578162	-0.0155889	-0.0101674	-0.0146839	-0.0114592	-0.0379072	-0.00475086
Dnajc24	0.0604437	-0.0589065	0.0430898	0.00737925	0.00845219	0.00439409	0.00642963	0.0160527	0.00343485
BB218582	-0.0609724	0.0902088	-0.0481733	-0.0107606	-0.0093367	-0.0108681	-0.00951567	-0.0584219	-0.00291877
Mpped2	-0.0242728	0.0462877	-0.0430266	-0.0033405	0.000627077	-0.00205165	-0.00586719	-0.0436625	0.00206277
Arl14ep	0.0831356	-0.0653589	0.0690838	0.0141838	0.0140244	0.00914559	0.0121363	0.010363	0.00628079
Mettl15	-0.00215721	0.0244969	-0.0216096	0.010798	0.0040471	0.00577271	-0.0014481	-0.0195192	0.00142394
Bdnf	0.0194098	-0.0161183	-0.010726	0.00381771	0.0036144	0.000402252	-0.00318354	0.00986638	-0.000845484
Lin7c	0.0732125	-0.0809522	0.111486	0.0116669	0.0118151	0.0140936	0.0152161	0.056297	0.00668052
Lgr4	-0.00858938	0.0359518	-0.0177244	-0.00745001	0.00488548	0.000751686	-0.000449014	-0.000507162	0.00362951
Ccdc34	0.159238	-0.145287	0.0503852	0.0152902	0.0152538	0.0169599	0.0120843	-0.0197326	0.00764297
Fibin	0.355708	-0.244053	-0.0377655	0.0440328	0.0551975	0.0482339	0.0303843	-0.0854941	0.0332008
Lpcat4	0.111681	-0.0960021	0.0442206	0.021672	0.0164406	0.0122654	0.0125507	0.0048506	0.0013246
Nop10	0.106451	-0.0688729	-0.00196682	0.00894811	0.0057757	0.00911914	0.00164241	0.00996126	0.00934096
Slc12a6	0.0915222	-0.0626747	0.0623288	0.0185145	0.0159423	0.0204294	0.0136482	-0.00572021	0.0124947
Emc4	0.063082	-0.0370202	0.0033503	0.00725889	0.00475136	0.00527934	0.00476591	-0.00523608	0.00354085
Katnbl1	0.123637	-0.12735	0.0759287	0.0149137	0.0163284	0.017438	0.0129467	0.0277649	0.0081089
Emc7	0.15677	-0.134076	0.0791413	0.0175225	0.0170078	0.0196383	0.0151728	0.0347306	0.0098692
Aven	0.0340094	-0.026177	0.0360637	0.00199891	0.000423706	0.00645041	0.00446375	0.0197739	0.00118848
Arhgap11a	0.143952	-0.117544	0.0453502	0.0174247	0.0188732	0.0216406	0.0123369	-0.0183459	0.00957426
Actc1	-0.596359	0.628238	-0.312105	-0.0674928	-0.0380086	-0.068731	-0.0724044	0.08818	-0.0444978
C130080G10Rik	-0.0763417	0.0134569	-0.0634644	-0.0259009	-0.0180782	-0.0267437	-0.0132639	0.0465245	-0.0142679
Aqr	0.0971086	-0.0867161	0.0891181	0.0174224	0.0116056	0.0122096	0.0164479	0.0244227	0.00612069
Zfp770	-0.0241947	0.013274	-0.00460133	-0.00465039	-0.00494558	-0.00458117	-0.0034169	0.0385256	-0.00470247
Dph6	0.0420075	-0.0505512	0.0676162	0.0131915	0.00531884	0.00697025	0.0101478	0.0348969	0.0046552
Meis2	0.0281803	-0.0268216	0.025427	0.00521381	0.00247848	0.00554395	-0.000737876	0.0129744	0.00341971
Spred1	0.196742	-0.207738	0.235975	0.0335743	0.02715	0.0305379	0.0310463	0.090978	0.0170218
Fam98b	0.062053	-0.0599788	0.0742965	0.0147428	0.0098568	0.0101151	0.0106562	0.0323515	0.00257388
Thbs1	0.589245	-0.574864	0.528097	0.0770966	0.071431	0.227306	0.0650548	0.0799862	0.0423943
Gpr176	0.37375	-0.305114	0.0402141	0.038495	0.0422687	0.0392022	0.031833	-0.057637	0.0224506
Eif2ak4	0.0768714	-0.0760207	0.0659804	0.0120568	0.00640443	0.00766913	0.00940069	0.0201022	0.00526246
Srp14	0.230122	-0.166565	0.0389866	0.0196819	0.0276483	0.0232357	0.0188161	-0.0174119	0.0126794
Bmf	0.148449	-0.106041	0.00282776	0.0161298	0.0214148	0.0242642	0.0106978	-0.0443459	0.0127805
Bub1b	0.15149	-0.115774	0.0064502	0.0189528	0.0163841	0.0188571	0.0107528	-0.042905	0.00831188
Pak6	-0.0024598	-0.0255444	0.0316208	-0.00165257	-0.000856249	-0.00440672	-0.00229463	0.0895993	-0.00190046
Inafm2	0.0667366	-0.0463185	0.0167673	0.010549	0.00995193	0.00458763	0.00324037	0.0216354	0.00772132
Ccdc9b	0.0167015	-0.00495151	0.000919041	0.00377768	0.0020532	0.000470242	0.00100306	0.00604951	0.00312523
Knstrn	0.158858	-0.117495	0.00629208	0.0232477	0.0142227	0.0172341	0.0125038	-0.0517432	0.0100186
Ivd	-0.212937	0.281663	-0.11232	-0.0217989	-0.0258207	-0.0218196	-0.0232026	-0.084477	-0.0164899
Bahd1	0.111406	-0.0900195	0.0697115	0.0146101	0.0121693	0.0143118	0.0118037	-0.00896151	0.00699164
Chst14	0.238703	-0.193924	0.0392443	0.0255851	0.0268364	0.0294167	0.0189645	-0.0282603	0.0210755
Ccdc32	0.0852723	-0.0653169	0.038672	0.0111922	0.00964309	0.00672386	0.00629487	-5.22351e-08	0.00504779
Rmdn3	0.0821604	-0.0485668	-0.00202905	0.00727215	0.0131438	0.00942034	0.00438032	-0.0279648	0.00593387
Gchfr	-0.04334	0.0545035	-0.0231862	-0.00513494	-0.00621303	-0.00175516	-0.00351835	-0.0242514	-0.00471205
Dnajc17	0.0287236	-0.0258911	0.0241923	0.00551961	0.00691426	0.00109275	0.00197886	0.0187547	-0.00051033
Zfyve19	0.0850186	-0.0689533	0.0722448	0.0111508	0.0113414	0.0134494	0.00819363	0.0186554	0.00708765
Vps18	0.129899	-0.10399	0.0295276	0.0136271	0.0158292	0.0129818	0.0154185	-0.016975	0.00397451
Dll4	0.048881	-0.0515534	0.0803005	0.0053388	0.00444633	0.00925504	0.00787934	0.0556215	0.00193308
Chac1	0.0188988	-0.00840788	0.0306853	0.00634882	0.0076443	0.00323949	0.00315183	0.0116803	0.00307428
Ino80	0.0824632	-0.0908855	0.0810325	0.00725518	0.00789725	0.0091461	0.00891967	0.038477	0.00644429
Chp1	0.139389	-0.119916	0.0956719	0.0100046	0.0219164	0.0232722	0.0109047	0.0207389	0.012121
Oip5os1	-0.0383506	0.0829695	-0.0244024	-0.00294673	-0.00900364	-0.0087522	-0.00404917	-0.0660918	-0.00359206
Nusap1	0.134608	-0.099684	0.0138863	0.0107146	0.0183933	0.0130286	0.013078	-0.0470813	0.00898505
Ndufaf1	-0.0909897	0.132618	-0.0462959	-0.00475305	-0.0089778	-0.0116403	-0.00854649	-0.0572723	-0.00723842
Rtf1	0.0773148	-0.0762287	0.088728	0.00574848	0.0100456	0.0109736	0.00994826	0.00411405	0.00447522
Rpap1	0.0482285	-0.023979	-0.00313153	0.0118652	0.00630932	0.00826274	0.00245851	-0.0145254	0.000925926
Tyro3	0.146472	-0.108966	0.00595707	0.0224337	0.0170252	0.0170552	0.0106164	-0.031776	0.0175186
Mga	0.0913887	-0.0908623	0.106755	0.0240668	0.0109833	0.0189298	0.0150916	0.0306689	0.00617107
Mapkbp1	0.0717223	-0.0489422	0.0368487	0.0142935	0.00637233	0.0103805	0.00766568	-0.0184128	0.00264497
Jmjd7	0.00516155	0.0181092	-0.0150366	0.000181998	0.00317227	0.00106011	0.00170272	-0.0182538	0.00397912
Ehd4	-0.0462074	-0.118461	0.137401	-0.0106038	-0.0167558	-0.00852257	-0.00253689	0.489933	-0.0135403
Vps39	0.0824296	-0.0384821	0.012556	0.0184458	0.0115186	0.00773853	0.00826962	-0.0348697	0.0138197
Tmem87a	0.0351964	-0.0308714	0.0358705	0.00366043	0.00549749	0.0135262	0.00785276	0.0259056	0.00145828
Ganc	0.014277	-0.0147197	-0.00777659	-0.0028462	0.85639	-0.000931467	-0.00143135	-0.000806277	-0.00404773
Zfp106	-0.101153	0.0742581	0.00242522	-0.0214299	-0.0149028	-0.0218377	-0.0113383	0.034258	-0.0164903
Snap23	0.143725	-0.136369	0.132693	0.0149138	0.024491	0.0247286	0.0151835	0.045864	0.00838856
Lrrc57	0.0254537	-0.016075	0.0228441	0.00653571	0.00776798	0.00481275	0.00591676	0.0154671	0.000394733
Haus2	0.0483524	-0.0635684	0.066108	0.00248349	0.00714591	0.00446064	0.00611596	0.0485127	0.00175879
Stard9	0.0976042	-0.0698181	0.0237911	0.0172948	0.0119271	0.0182761	0.00798075	-0.0380836	0.00864692
Cdan1	0.0525395	-0.0267858	0.000673369	0.00439475	0.00569968	0.00806487	0.00299203	-0.0241148	0.00496581
Ttbk2	0.040388	-0.0255903	0.0105285	0.00666371	0.00458793	0.00188381	0.00369055	-0.0108007	0.00273102
Ubr1	0.0507734	-0.0446013	0.053235	0.00873723	0.0111236	0.00766281	0.00762698	0.00777027	0.0040864
Tmem62	0.056474	-0.0765773	0.0420613	0.00562967	0.00275629	0.00474248	0.00358296	0.06072	0.00381331
Ccndbp1	0.0987908	-0.0723889	0.0224307	0.00997829	0.0136885	0.0136102	0.00658508	-0.0210441	0.00914692
Lcmt2	0.00188612	0.00413307	0.010622	-0.00165041	-0.00154717	-0.00246069	-0.00406151	0.000457218	0.00259937
Adal	0.0154848	0.00319851	-0.00686587	0.00238654	0.00452216	0.00449178	0.00199242	-0.0213142	0.000499433
Zscan29	0.0719947	-0.0563316	0.0363617	0.0147165	0.00958951	0.00959944	0.00806864	0.00015116	0.00675424
Tubgcp4	0.0385418	-0.0425743	0.0156343	0.000669689	0.000561622	0.00200176	0.000371039	-0.00170743	0.937758
Trp53bp1	0.0590241	-0.03868	0.0212145	0.00705799	0.0118214	0.00660635	0.00533476	-0.0062669	0.00171813
Map1a	0.141716	-0.109904	0.0140238	0.020207	0.0208015	0.0195565	0.0140833	0.00197777	0.0140467
Ppip5k1	-0.0543022	0.0375108	-0.0317874	-0.0111369	-0.00960771	-0.00964038	-0.00657065	0.0402461	-0.00725004
Pdia3	0.505192	-0.436246	0.278291	0.065516	0.0637541	0.0745437	0.052011	0.075495	0.0377142
Serf2	0.700267	-0.484449	-0.0292685	0.0635227	0.0799543	0.212823	0.0441749	-0.173245	0.200141
Hypk	0.00966278	0.00560143	0.0281363	-0.00120892	-0.00193666	-0.00274981	-0.000954177	0.0607916	4.23349e-05
Mfap1b	0.0576656	-0.0395566	0.0228276	0.00484958	0.00830119	0.0162459	0.00396531	-0.00706682	0.00219716
Mfap1a	0.0511462	-0.0519174	0.0744255	0.00646175	0.00415282	0.00494908	0.00736846	0.0300452	0.00619126
Frmd5	-0.149696	0.202032	-0.115376	-0.0146362	-0.0188504	-0.0188491	-0.0181953	-0.0629851	-0.0070662
Casc4	0.124059	-0.109088	0.0429512	0.0178428	0.0139625	0.0200225	0.0131348	0.00237139	0.0105606
Ctdspl2	0.0542933	-0.0469797	0.0714428	0.0069245	0.00736506	0.0113204	0.00807626	0.0197112	0.00489044
Eif3j1	0.0689755	-0.164184	0.20188	0.00926845	-0.00122359	0.00690784	0.00700113	0.197913	-0.000282546
Spg11	0.0736591	-0.0521801	0.0205738	0.00965914	0.0111126	0.00824311	0.00488595	0.00294679	0.00484281
B2m	0.770856	-0.613582	0.182663	0.0795993	0.092855	0.159243	0.0643621	-0.123728	0.0509981
Sord	-0.13995	0.133125	-0.071007	-0.0238521	-0.0291935	-0.024447	-0.025283	-0.0657644	-0.0197693
Shf	0.111625	-0.0855458	0.0178111	0.0118895	0.0135	0.013687	0.0115356	-0.013278	0.00875508
Slc28a2	-0.0156128	0.0427512	-0.0185521	-0.000151613	0.00353992	-0.00312874	-0.00174386	-0.0369276	-0.00287931
Gatm	0.178378	-0.135723	0.0446751	0.0266145	0.0231877	0.0183398	0.0195131	-0.0280845	0.0094321
AA467197	0.209014	-0.320741	0.654345	0.0373446	0.0270567	0.0439134	0.0473998	0.264229	0.012192
Slc30a4	0.124584	-0.147264	0.126872	0.0158539	0.0189291	0.0218102	0.0205093	0.0759845	0.00870394
Bloc1s6	0.0468979	-0.0331167	0.0261257	0.00687468	0.00602196	0.0130098	0.00773237	0.0353177	0.00458356
Sqor	0.0447458	-0.0286743	0.0162772	0.00122029	0.00235283	0.0124621	-0.00139072	-0.0171246	0.00233102
Sema6d	0.0743069	-0.0890138	0.118553	0.0120637	0.0118851	0.0180215	0.0143023	0.0595625	0.00802287
Myef2	0.103241	-0.103406	0.0905739	0.015179	0.0117734	0.0150123	0.0172984	0.0347111	0.00606194
Dut	0.134919	-0.0892956	0.00601273	0.0120635	0.0120696	0.0145799	0.00890829	-0.0538816	0.00952796
Fbn1	0.706483	-0.531681	0.00910102	0.0783896	0.0892497	0.423851	0.053765	-0.143349	0.0616816
Eid1	0.246253	-0.218122	0.0905801	0.0242549	0.536444	0.0248062	0.0221219	0.00847887	0.0128106
Secisbp2l	0.0878052	-0.0770633	0.0824219	0.0128	0.0121124	0.014339	0.0182318	0.00731049	0.00469453
Cops2	0.0842174	-0.0747324	0.0831908	0.012503	0.0102636	0.0147622	0.0104589	0.032736	0.0092853
Galk2	0.174214	-0.134053	0.0397661	0.0239856	0.0174757	0.0212846	0.0135886	-0.026511	0.0155843
Dtwd1	0.065526	-0.0524052	0.0186607	0.0140668	0.0107388	0.0116045	0.00650961	0.00543488	0.00391299
Gabpb1	0.0281067	-0.0508575	0.0340746	0.00132524	0.000920202	0.000815901	0.924407	0.0204807	-0.00189194
Usp8	0.162891	-0.154204	0.0836383	0.0201851	0.0205002	0.0216673	0.0196234	0.0214193	0.00947132
Usp50	-0.0177357	0.0627218	-0.0240852	0.00533547	0.00165807	0.000353715	0.000229726	0.0177892	0.00547144
Trpm7	0.0930264	-0.0752207	0.0680126	0.0206143	0.0112233	0.0145754	0.00840579	0.00187637	0.00899225
Sppl2a	0.152606	-0.13033	0.114661	0.016663	0.0138199	0.0192153	0.0181811	0.0178119	0.0100906
Blvra	0.205705	-0.156192	0.0181709	0.0201194	0.0201339	0.0205445	0.0185641	-0.0452783	0.00917717
Ncaph	0.103318	-0.0793423	0.00464322	0.0143425	0.0163449	0.00508961	0.00900657	-0.0227335	0.00921391
Itpripl1	0.0631598	-0.0488228	0.035182	0.0102694	0.00695164	0.00644907	0.0098234	-0.0159502	0.00329634
1810024B03Rik	0.098128	-0.0725943	-0.0140942	0.00468632	0.00829968	0.012696	0.0025947	-0.0331209	0.0106202
Snrnp200	0.125792	-0.0963355	0.0456193	0.0109274	0.0141895	0.0151776	0.00924303	-0.00666396	0.00911118
Ciao1	0.0771395	-0.035814	0.00886322	0.0123134	0.00785081	0.0139152	0.00624008	-0.0319095	0.00987434
Tmem127	0.195536	-0.156314	0.0708898	0.0244623	0.0283104	0.0243508	0.0184938	-0.0079985	0.0116665
Stard7	-0.086589	0.137055	-0.0413859	-0.0047126	-0.0095081	-0.00609503	-0.00675254	-0.0808733	-0.00641485
Fahd2a	-0.0950662	0.129688	-0.0642347	-0.0117164	-0.01359	-0.0136379	-0.010898	-0.0694342	-0.0065362
Mrps5	0.0202961	-0.00654264	0.0174189	0.00397596	0.00450432	0.00706125	0.00328709	0.0121386	0.00289453
Mal	0.00536682	-0.0636387	-0.00661436	-0.0046615	-0.00121144	-0.0111377	-0.00574977	0.098609	-0.00384883
Mall	0.0454636	-0.0472004	0.0800146	0.0154081	0.0130039	0.0151814	0.0113779	0.0469258	4.74834e-05
Nphp1	0.0847302	-0.0635107	-0.0045541	0.00241924	0.00627385	0.00960031	0.00533896	-0.033605	0.00853132
Mtln	-0.0184949	0.0199978	-0.0400724	-0.0129879	-0.0102749	-0.0132913	-0.0116979	0.0102581	-0.00604022
Bcl2l11	0.129356	-0.106453	0.100636	0.0207642	0.0187232	0.0257307	0.0147981	-0.0125146	0.00533113
Morrbid	0.186097	-0.194855	0.159642	0.0191757	0.0232903	0.0348538	0.0221201	0.0656513	0.010172
Anapc1	0.167212	-0.131807	0.0611659	0.0197376	0.0210809	0.0227958	0.0153597	0.00596381	0.0113146
Mertk	0.147267	-0.144636	0.084116	0.0177854	0.0158657	0.0163169	0.0149891	0.0137205	0.0118953
Tmem87b	0.0525774	-0.0412661	0.0272307	0.00855475	0.00637619	0.0105412	0.00627705	0.00791858	0.00556535
Zc3h8	-0.00466348	0.0108087	0.028291	0.000632682	0.000620975	0.00601387	-0.00166537	-0.00830965	-0.00230167
Gm10762	0.0027667	0.0124902	-0.0241237	0.00430832	0.00190243	-0.000956615	0.00159615	-0.0392724	0.00283741
Ttl	0.0506334	-0.0308988	0.021805	0.00473467	0.00443418	0.00840754	0.00553606	-0.00686942	0.00376682
Polr1b	0.0480148	-0.0729634	0.0644821	0.010081	0.00559515	0.0096552	0.00620771	0.0823614	-0.00067847
Chchd5	0.0807422	-0.0481421	0.000377208	0.0124782	0.00630896	0.00730175	0.00554119	-0.038449	0.00640804
Slc20a1	0.117107	-0.098567	0.0860105	0.0134416	0.0165046	0.0140706	0.0166919	0.0235128	0.00663082
Ckap2l	0.191221	-0.150732	0.0119655	0.0228197	0.0233933	0.0238572	0.0150607	-0.0530088	0.00930892
Il1b	0.13112	-0.232833	0.641532	0.0287313	0.0144839	0.0304416	0.0400138	0.241858	0.00708067
Sirpa	0.542154	-0.458497	0.19898	0.0648982	0.0625407	0.0648537	0.0475336	-0.0373458	0.0369085
Stk35	0.0383706	-0.0306987	0.0503497	0.00564643	0.00604015	0.010265	0.0091371	0.00437085	0.0129777
Snrpb	0.23167	-0.185342	0.150149	0.0302491	0.0328525	0.0315752	0.0281568	0.039326	0.0182871
Nop56	0.147002	-0.208197	0.264484	0.0216747	0.0166086	0.0266987	0.0309872	0.17662	0.00384156
Idh3b	-0.28516	0.350633	-0.15926	-0.0435006	-0.0455469	-0.0461093	-0.0352405	-0.0763973	-0.0234914
Cpxm1	0.33047	-0.238905	0.00886983	0.0483288	0.057115	0.051982	0.031856	-0.0975768	0.0267736
Pced1a	0.0916927	-0.0663397	0.0150014	0.0106585	0.0164749	0.0120708	0.0103556	-0.0157675	0.00429753
Vps16	0.115762	-0.0888614	0.0288539	0.0119152	0.0160683	0.0196445	0.016731	-0.0149991	0.0155951
Ptpra	0.251364	-0.199352	0.0656398	0.0346087	0.0354012	0.034506	0.0252637	-0.0231644	0.0161447
Mrps26	0.0510418	-0.0235676	0.000561967	0.280242	0.00357948	0.00314993	0.00259935	-0.00163581	0.00927047
Ubox5	0.0130859	-0.00270389	-0.00317904	0.00143952	0.00120208	-0.000631399	-0.00274502	-0.00351249	0.000364988
Fastkd5	0.0198308	-0.0155575	0.00647296	-3.62366e-05	0.00599579	0.0122192	0.00351071	0.0223723	0.000468519
Ddrgk1	0.132163	-0.0759393	-0.0149078	0.0211238	0.0160435	0.0209922	0.00911223	-0.0471211	0.0121143
Itpa	0.0998721	-0.0630741	0.0437893	0.0153355	0.016551	0.0120776	0.0109951	-0.00780319	0.00908257
4930402H24Rik	0.0427541	-0.0485655	0.0737189	0.0106533	0.0108939	0.00207658	0.00498424	0.0337163	0.00196944
Atrn	0.0673557	-0.0411394	0.0146462	0.0025412	0.0100612	0.00974346	0.00381748	-0.00550261	0.00591228
Gfra4	-0.0263947	0.0497151	-0.0239608	0.0034125	-0.00324725	-0.00107748	0.00126374	-0.0229697	-0.00145017
Siglec1	0.143781	-0.113618	0.0393746	0.010813	0.0133812	0.0177443	0.0128391	-0.0208853	0.00887951
Hspa12b	-0.0266948	0.0666961	-0.0311234	0.00275193	0.00226927	-0.00133788	-0.00112424	-0.0308766	0.00179756
1700037H04Rik	0.164712	-0.138711	0.069175	0.0235675	0.0195915	0.0196475	0.0168353	-0.00953123	0.0101249
Spef1	0.0960033	-0.0571549	0.00365322	0.0126776	0.017987	0.0188599	0.00945892	-0.0259558	0.0139671
Cenpb	0.187971	-0.164892	0.124994	0.0304638	0.0268975	0.0307468	0.018729	0.0341528	0.0122959
Cdc25b	0.138866	-0.107176	0.0802749	0.0124015	0.0211993	0.0161486	0.0140855	-0.0197539	0.00705454
Ap5s1	0.0184931	0.0258069	-0.00598006	0.00399618	0.00111418	0.00591876	0.00192243	-0.0276362	0.0041672
Mavs	-0.0210059	0.0422461	-0.0263471	-0.00378479	-0.00402112	-0.0057029	-0.006415	-0.0280924	0.795036
Pank2	0.140618	-0.114004	0.0439367	0.0171858	0.019806	0.0159099	0.0146015	-0.00779576	0.0135772
Rnf24	0.0581116	-0.0669613	0.0647766	0.00720527	0.0100157	0.0094714	0.00563129	0.0452171	0.0129428
Smox	0.110995	-0.115351	0.257065	0.0218883	0.0152795	0.0259096	0.0260936	0.086603	0.0112831
Prnp	0.116556	-0.120272	0.0179172	0.0103992	0.0167409	0.0185356	0.00883636	0.100799	0.00979056
Prnd	0.162947	-0.125371	0.0336542	0.0225057	0.0247675	0.0188593	0.0144155	-0.0544533	0.00848505
Rassf2	0.222922	-0.180723	0.0990683	0.036431	0.0288518	0.03356	0.0229772	-0.0221997	0.016047
Slc23a2	0.0632876	-0.0645936	0.0786206	0.0104612	0.00593409	0.00672016	0.0102266	0.0536595	0.00905385
Tmem230	0.0718464	-0.0678805	0.0430862	0.00928609	0.00774929	0.0100903	0.00865926	0.0312858	-0.000601389
Pcna	0.248776	-0.258921	0.211123	0.0314272	0.0337206	0.034342	0.0300087	0.0920585	0.0145164
Cds2	0.0253916	0.00394249	0.0565212	0.00909352	0.00752042	0.013614	0.0077046	-0.00136853	0.00322737
Gpcpd1	-0.168355	0.236904	-0.079658	-0.0127005	-0.0177862	-0.0205938	-0.0200451	-0.145423	-0.0145064
Shld1	-0.0196967	0.0745974	-0.0451681	-0.000192845	-0.00108331	-0.00422988	-0.00595673	-0.0669594	-0.00110019
Trmt6	0.0702185	-0.095426	0.128181	0.0100125	0.0038667	0.0115439	0.0180781	0.0702297	0.00409601
Crls1	0.0459754	-0.0499834	0.0491784	0.00701483	0.00599578	0.00687572	0.00347626	0.0325219	0.00247406
Tmx4	0.00817287	0.0189361	-0.00224795	0.0015787	0.000367133	0.00549586	0.00176839	-0.00168634	0.0021297
Plcb1	0.0329485	-0.0234662	0.0321776	0.00425459	0.00789937	0.00234465	0.00274599	0.0171076	0.00139787
Plcb4	-0.0114968	0.0495958	-0.0336026	0.00295712	-0.000334081	-0.00195135	-0.00152238	-0.04244	-0.00179698
Mkks	-0.0109052	0.0352647	-0.0135074	0.000717366	0.00117712	-0.00346347	0.000132139	-0.0152322	-0.000222411
Jag1	0.148122	-0.11249	0.0619301	0.0223455	0.0254717	0.0260625	0.0234585	-0.00902471	0.0139493
Btbd3	0.0396181	-0.0135086	0.0106876	0.00766742	0.0105371	0.0084933	0.00598855	-0.00398223	0.00488997
Ism1	0.26068	-0.19192	-0.0113795	0.0290369	0.0311827	0.0280499	0.0178951	-0.0616258	0.0203649
Tasp1	0.0668708	-0.0567088	0.00597396	0.00283681	0.0059264	0.00654177	0.00403993	0.003952	0.00398147
Esf1	0.0378453	-0.0822213	0.195108	0.00942673	0.00103085	0.00565809	0.00939825	0.0830726	-9.24521e-05
Ndufaf5	-0.0631876	0.0813259	-0.0413298	-0.015401	-0.0126579	-0.0134992	-0.009478	-0.036689	-0.00796126
Macrod2	0.00122751	0.00902256	-0.0313775	-0.00101903	-0.00337482	0.000393489	-0.000950472	-0.00379154	0.00111388
Kif16b	-0.0164791	0.0324966	-0.0318397	-0.00502041	0.00208743	-0.00460652	-0.00553003	-0.0241285	-0.0010448
Snrpb2	0.186174	-0.17785	0.101564	0.0209587	0.0244964	0.0248806	0.0178755	0.0333081	0.0169508
Dstn	0.337559	-0.226626	0.051852	0.0411147	0.0452273	0.0508982	0.030836	-0.0684968	0.0337723
Rrbp1	0.517791	-0.448224	0.298138	0.0733235	0.0741836	0.0788851	0.0590344	0.0426349	0.041401
Snx5	0.350818	-0.304811	0.156063	0.0375661	0.0427504	0.0487388	0.0314995	0.0224395	0.0225937
Mgme1	0.0315857	-0.0130734	-0.00304933	0.00403316	0.00582858	0.00229476	0.00501285	-0.0171225	0.00579754
Kat14	0.0797088	-0.0544161	0.0256924	0.623524	0.00827248	0.0178235	0.0119904	-0.0121878	0.00763673
Polr3f	0.0318812	-0.0378666	0.055361	0.00553961	0.00101909	0.00411118	0.00574781	0.0431728	0.000118496
Rbbp9	0.08288	-0.0632433	0.0140181	0.0141688	0.0114623	0.0179073	0.00401247	-0.0125534	0.00345072
Sec23b	0.152902	-0.164689	0.131903	0.0153513	0.0181839	0.0167226	0.0147789	0.0800725	0.0106888
Smim26	-0.0688143	0.0918564	-0.0647228	-0.0131224	-0.0156642	-0.0187558	-0.016802	-0.0559991	-0.00808182
Dtd1	0.084444	-0.0634463	-0.0116764	0.00628647	0.0126159	0.00878479	0.00317497	-0.0235195	0.00370146
Rin2	0.242338	-0.176346	0.0431502	0.033917	0.0358708	0.0342494	0.021369	-0.0485135	0.0243767
Naa20	0.0309425	-0.0251731	0.0446085	-0.00565563	0.000239438	0.00553932	0.00337641	0.0501606	-2.84853e-05
Crnkl1	0.0675519	-0.0574391	0.0478582	0.00614358	0.00720491	0.0038762	0.00850735	0.0180785	0.00688393
Ralgapa2	-0.0489907	0.0369542	0.00643357	-0.00579608	-0.0114784	-0.0101578	-0.00710048	0.0121491	-0.00542251
Kiz	-0.0362036	0.0655153	-0.0494937	-0.00398998	-0.00798828	-0.00691501	-0.00315237	-0.0564149	-0.00359248
Xrn2	0.138332	-0.143593	0.117134	0.0209562	0.0224586	0.0201392	0.0158665	0.0428341	0.00772724
Thbd	0.0901255	-0.151879	0.328805	0.0278791	0.0185291	0.0289927	0.0268915	0.217081	0.00919846
Cd93	0.244856	-0.22761	0.216833	0.0336967	0.0311754	0.0433026	0.0326239	0.0233781	0.0193612
Nxt1	0.155712	-0.141992	0.09029	0.0179998	0.0224517	0.0198267	0.0196742	0.0340625	0.0101957
Gzf1	0.0296489	-0.0119978	0.00822695	0.00379374	0.00609632	0.00804907	0.00344536	-0.00703009	0.00167076
Cst3	0.674033	-0.476728	-0.0754072	0.107419	0.0783806	0.0677381	0.0405407	-0.185543	0.209364
Zfp120	0.0756256	-0.0578664	0.0511572	0.0119326	0.0106054	0.0137788	0.00757553	-0.023918	0.00329196
Apmap	0.0238313	-0.00673181	0.00795247	9.53752e-05	0.00317532	0.00305497	0.0046234	-0.00305915	0.000817622
Acss1	-0.283371	0.370322	-0.149349	-0.0303478	-0.0347327	-0.0404648	-0.0320308	-0.138933	-0.0198232
Entpd6	0.0205442	-1.82881e-05	0.00382542	0.00319046	0.00341032	0.00225802	0.000859073	-0.0128671	0.00203868
Pygb	-0.17009	0.30488	-0.198414	-0.0209128	-0.0182292	-0.0178967	-0.0256875	-0.208952	-0.0086987
Abhd12	0.343654	-0.246496	0.0275152	0.0328362	0.0412281	0.0419266	0.0261416	-0.0912412	0.0215121
Gins1	0.0642987	-0.0507715	0.0187724	0.00612943	0.01026	0.00721524	0.0054938	0.00684598	0.00297481
Nanp	0.0955026	-0.0786142	0.0223073	0.0128433	0.0130753	0.0100024	0.00690984	0.00429413	0.00549636
Nsfl1c	0.100378	-0.122023	0.110628	0.0114684	0.0129227	0.0156846	0.0107022	0.10403	0.00777572
Fkbp1a	0.338041	-0.339506	0.33621	0.0467259	0.0430344	0.0562004	0.0475358	0.19657	0.0253521
Tmem74b	-0.0483625	0.0538072	-0.0154676	-0.00447533	-0.00818514	-0.00725914	-0.00763551	-0.00971028	-0.00245327
Psmf1	0.0912419	-0.0629711	0.0252288	0.0117994	0.0103584	0.0241338	0.00752308	-0.00360376	0.0115354
Fam110a	0.0871614	-0.0604735	0.0357252	0.0186227	0.0120375	0.0190939	0.0107256	-0.0235229	0.00599023
Srxn1	0.143359	-0.23112	0.321853	0.0262581	0.0218948	0.0242592	0.0285882	0.235007	0.00834459
Tcf15	-0.062288	0.096229	-0.0653661	-0.00896281	-0.00687016	-0.0101545	-0.00992808	-0.0553278	-0.00349624
Csnk2a1	0.00484135	0.0136027	0.0533326	0.00226795	-0.000617916	0.00705717	0.00467331	0.0115954	0.00233963
Tbc1d20	0.199098	-0.160167	0.0800479	0.0210947	0.0270496	0.0252249	0.0175382	0.00090229	0.0111686
Rbck1	0.182044	-0.118171	0.0387562	0.0256888	0.0285331	0.025697	0.0172689	-0.0404958	0.0166958
Trib3	0.0598553	-0.0793216	0.136365	0.0110859	0.00680353	0.0083415	0.0101794	0.0593562	0.00216602
Sox12	0.0115441	0.0196905	-0.0112927	0.00485943	0.00530216	0.00540391	0.00231866	-0.0174281	0.00379764
Zcchc3	-0.00161078	0.00986887	0.00744118	0.00114637	0.00238722	0.00293014	0.00390071	0.00945263	9.08652e-05
Rem1	0.0896833	-0.0696201	0.0235003	0.00832723	0.0135177	0.0150448	0.00870811	-0.00508435	0.00780521
H13	0.353855	-0.323796	0.239368	0.0422508	0.421404	0.0523598	0.0379695	0.052971	0.028127
Mcts2	0.00807211	-0.00617684	-0.00140929	-0.000286872	0.00243037	-0.0034057	-0.00190423	0.0109521	0.00148592
Id1	0.0475788	-0.0221967	0.123759	0.0078144	0.00869328	0.00979856	0.0112122	0.0145278	0.00655212
Cox4i2	-0.0115255	0.0420009	-0.0281604	-0.00209797	0.000654936	-0.00322218	-0.000517122	-0.0365978	-0.000397579
Bcl2l1	0.112249	-0.124396	0.196235	0.0152036	0.0171714	0.019333	0.0157198	0.0657043	0.00562664
Tpx2	0.221907	-0.175702	0.0217163	0.0179483	0.0260608	0.0252967	0.0167953	-0.0580869	0.0146157
Foxs1	0.186372	-0.139502	-0.000576467	0.0240705	0.0259461	0.0265925	0.0167615	-0.0443412	0.0160226
Pdrg1	0.0154247	0.0676689	-0.0639902	-0.0048897	0.00146422	0.00434807	0.00110165	-0.0888032	0.00202531
Ccm2l	-0.0155052	0.0540332	-0.0336823	0.00483937	0.00487246	0.00646788	0.00374134	-0.0369981	0.00249376
Hck	0.316878	-0.299996	0.239252	0.0365496	0.0364454	0.0382085	0.0309918	0.0410627	0.0170528
Tm9sf4	0.161249	-0.129782	0.0369178	0.015965	0.0126753	0.621448	0.0117139	-0.0256283	0.0157004
Tspyl3	0.100712	-0.0705624	0.00922298	0.0195292	0.0129992	0.0232231	0.0093986	-0.024242	0.0123569
Plagl2	0.111491	-0.0918429	0.0586688	0.0124391	0.00903581	0.0156032	0.0113122	-0.00729184	0.00811978
Pofut1	0.142285	-0.0979826	0.0205262	0.0199355	0.0220051	0.0231177	0.0124348	-0.018143	0.0106933
Kif3b	0.153149	-0.160959	0.129554	0.0208387	0.0170692	0.0200976	0.0152083	0.0425425	0.00570581
Asxl1	0.107092	-0.0804307	0.0714114	0.0158223	0.013928	0.0187307	0.0101385	0.00647688	0.00757455
Nol4l	0.0443311	-0.0366683	0.038988	0.00672592	0.00363544	0.0040712	-6.59816e-05	0.00814724	0.00291774
Commd7	0.226303	-0.189356	0.0738702	0.0242471	0.0283468	0.0332745	0.021742	0.00936845	0.0211577
Mapre1	0.248524	-0.253286	0.201255	0.0279104	0.0350717	0.0399292	0.0279386	0.0915615	0.0152026
Cdk5rap1	-0.0128638	0.0176165	0.00391938	-0.00481288	-0.00528994	-0.00342175	0.00102716	0.000658835	-0.0039175
Snta1	-0.0716133	0.121297	-0.079766	-0.00742449	-0.00445373	-0.0108769	-0.0105354	-0.0260841	-0.00589269
Cbfa2t2	0.0876883	-0.0694909	0.0429834	0.0130612	0.00712617	0.0126551	0.00980401	0.00283369	0.00423454
E2f1	0.147397	-0.135606	0.0716039	0.0200812	0.0153892	0.020266	0.0169783	-0.0105258	0.00884765
Pxmp4	-0.0260078	0.0631226	-0.0593686	-0.00413945	-0.00437924	-0.00877436	-0.00742487	-0.0851958	-0.00399521
Chmp4b	0.133815	-0.130906	0.18822	0.0253231	0.01483	0.0203355	0.0219581	0.098824	0.00960753
Raly	0.197665	-0.16471	0.0759943	0.0298034	0.0247492	0.0251364	0.0196812	-0.00378143	0.0187458
Eif2s2	0.182422	-0.31487	0.337419	0.0174646	0.0102773	0.0190682	0.024435	0.271867	0.00377009
Ahcy	0.0224554	-0.0190441	0.0365458	0.00678227	0.00419556	0.00421949	0.00510797	0.0216016	-0.00104412
Itch	0.16614	-0.155738	0.103133	0.0236334	0.0199089	0.0301356	0.0171131	0.0326288	0.0159833
Dynlrb1	0.263177	-0.227996	0.0681644	0.0169019	0.0200151	0.0210908	0.0170161	0.00670295	0.00947377
Map1lc3a	-0.42928	0.570262	-0.262018	-0.0515073	-0.0555937	-0.0570024	-0.0516995	-0.208451	-0.0271042
Pigu	0.0382527	-0.0149031	0.000746406	0.00360549	0.00434354	0.000934189	0.00346639	-0.0111882	0.0017149
Trp53inp2	-0.144452	0.25546	-0.164085	-0.014519	-0.0182555	-0.0232871	-0.0216771	-0.164108	-0.00626824
Ncoa6	0.0840169	-0.0708421	0.0488553	0.0133748	0.0113062	0.0153842	0.0124363	0.0159769	0.00633321
Acss2	-0.0630332	0.0842382	-0.0308618	-0.00597657	-0.00619141	-0.00642001	-0.00852679	-0.0182878	-0.000160131
Gss	0.0738777	-0.0703073	0.035755	0.0093826	0.0133188	0.0128544	0.0077597	0.0440855	0.00897504
Myh7b	-0.0794379	0.129183	-0.0727974	-0.00107929	-0.00502669	-0.00390984	-0.00756553	-0.0772351	-0.00104392
Trpc4ap	0.158136	-0.120332	0.0440021	0.0185074	0.0280632	0.0138105	0.0183192	-0.00443861	0.0132944
Edem2	0.233006	-0.185236	0.0591938	0.0286689	0.0330062	0.0270891	0.0228906	-0.0114062	0.0191761
Procr	0.1266	-0.153384	0.211317	0.0273217	0.0175976	0.0260449	0.0256384	0.0610142	0.0112919
BC029722	0.0883363	-0.0496666	-0.00726858	0.007098	0.00865806	0.0132641	0.00544098	-0.0374116	0.00935779
Eif6	0.227948	-0.264313	0.286651	0.301852	0.0282973	0.0370433	0.0366349	0.204652	0.0149972
Uqcc1	-0.117803	0.151675	-0.0826394	-0.0149179	-0.0167281	-0.0196772	-0.0143063	-0.0543283	-0.00492673
Cep250	0.110248	-0.0796644	0.0200875	0.0119439	0.0135005	0.0328923	0.00824245	-0.0181881	0.0126688
Ergic3	0.465824	-0.34018	0.00808362	0.0496369	0.0570375	0.055097	0.0361021	-0.103935	0.0388034
Cpne1	0.204299	-0.185053	0.0977393	0.0264162	0.0275248	0.0314693	0.0236797	0.00733748	0.0166085
Nfs1	-0.0369676	0.0594605	-0.0315451	-0.0148652	-0.00884045	-0.00711495	-0.00540246	-0.0118601	-0.00623705
Romo1	0.0323652	0.00666945	-0.0640337	-0.0123204	-0.00936851	0.16298	-0.0146989	-0.0325578	-0.00524801
Rbm39	0.17767	-0.151158	0.169167	0.0305237	0.0283053	0.0291612	0.58254	0.00414886	0.0124912
Phf20	0.0690931	-0.0863897	0.0946877	0.0104012	0.0139476	0.0110941	0.0103679	0.0558668	0.00334965
Scand1	0.23078	-0.145744	0.0710849	0.0213265	0.0290092	0.0247167	0.0161503	-0.0760195	0.0121914
2900097C17Rik	0.16217	-0.11037	0.0693184	0.01568	0.0230161	0.0224788	0.0149262	-0.0286374	0.0149384
Epb41l1	0.130103	-0.105441	0.0395743	0.0107904	0.0177075	0.0129589	0.0111215	-0.00918377	0.012121
Aar2	0.0129215	0.00687444	0.0334128	0.00428492	0.00715413	0.00842567	0.00337197	-0.00341399	0.000883074
Dlgap4	0.169253	-0.15277	0.0851872	0.022206	0.0193872	0.021732	0.015172	0.0669786	0.0153681
Myl9	0.510902	-0.363512	0.00189948	0.0533728	0.0633639	0.0677193	0.0392548	-0.133125	0.0437302
Rab5if	0.23494	-0.194839	0.0980429	0.0208804	0.0297044	0.0266828	0.0165398	0.0155333	0.0167877
Ndrg3	0.170596	-0.133311	0.00736	0.0162404	0.0227152	0.0187393	0.0125419	-0.0161845	0.012346
Soga1	0.0632311	-0.057191	0.039886	0.00750584	0.00900058	0.0103457	0.00351896	0.010815	0.00833875
Samhd1	0.313728	-0.296004	0.284395	0.0395674	0.0392528	0.0405294	0.029846	0.037718	0.0182301
Rbl1	0.0985686	-0.0909175	0.0529402	0.0177465	0.0143452	0.0130309	0.0149417	-0.00334632	0.0067949
Rpn2	0.444386	-0.349757	0.173349	0.0556786	0.0588022	0.0632095	0.046348	-0.0123002	0.0330406
Manbal	0.209304	-0.164786	0.0426493	0.028043	0.0344063	0.029499	0.0207202	0.00601298	0.0182254
Src	0.114105	-0.0972653	0.0312699	0.0111801	0.823503	0.00966043	0.00582164	0.00201264	0.00559209
Blcap	0.0215207	-0.00846081	0.0596605	0.00805611	0.00688078	0.00455133	0.00601891	-0.000369657	-0.000286218
Ctnnbl1	0.110155	-0.0841435	0.0506362	0.012625	0.0124906	0.0150454	0.0140626	-0.00093762	0.00811842
Tti1	0.00656528	-0.00631164	0.0148504	-0.00119876	0.0020912	0.000285612	-0.0013308	0.00401443	-0.00374103
Rprd1b	0.0140309	-0.0131403	0.0321413	0.00246053	0.680964	-9.11104e-05	0.00359833	0.0240745	-0.00417033
Tgm2	0.165165	-0.237805	0.237178	0.0191655	0.0213224	0.0224501	0.0249264	0.3667	0.0131111
D630003M21Rik	-0.00951348	0.0321686	-0.045387	-0.0020857	0.00111381	-0.000825339	-0.00221782	-0.046012	0.000642231
Lbp	0.126879	-0.0777548	-0.00926242	0.0163825	0.0219681	0.0177378	0.00900875	-0.02506	0.0135764
Snhg17	0.0979188	-0.105258	0.0985576	0.0206114	0.0131283	0.0197071	0.0136017	0.046475	0.0108156
Ralgapb	0.0805534	-0.0695565	0.0360456	0.010463	0.00769734	0.00533881	0.00704079	0.00717353	0.00730104
Actr5	0.0567483	-0.0464574	0.0285977	0.0102527	0.00423703	0.00853447	0.00298804	0.00614345	0.00150108
Ppp1r16b	0.011176	-0.00266948	0.0215807	0.0064365	8.67324e-05	0.00353867	0.0041458	0.00291373	0.00112629
Dhx35	0.0184913	-0.00529729	0.00612575	-0.000410516	-0.0012267	0.00106615	0.000614166	-0.0130933	0.00184091
Gm826	-0.0471493	0.0702738	-0.0249313	-0.0108157	-0.00517553	-0.00409933	-0.0036031	-0.0388654	-0.00391524
Mafb	0.383855	-0.369947	0.324323	0.0439511	0.0495141	0.0569625	0.042512	0.0498475	0.0223882
Top1	0.120591	-0.152437	0.210212	0.0176979	0.0124126	0.0218217	0.0164663	0.0883413	0.00525174
Plcg1	0.0838577	-0.0322789	-0.0188048	0.0147008	0.0137383	0.0160935	0.00343375	-0.0593479	0.0119218
Zhx3	0.0498928	-0.0246531	0.0119229	0.00478048	0.00555906	0.00707719	0.00410169	3.91153e-05	0.0022286
Lpin3	0.0826123	-0.0704652	0.045245	0.0124619	0.0106512	0.0123036	0.00614893	0.0164814	0.00698497
Chd6	-0.00312884	0.0457369	0.00398112	0.0018236	0.00685245	0.00778953	0.00349788	-0.0250738	0.00308675
Srsf6	0.15882	-0.119296	0.0718637	0.0164798	0.411465	0.0238389	0.0150366	-0.0125673	0.0129577
Ift52	0.0854669	-0.071083	0.0259166	0.00185037	0.0129436	0.0101275	0.00740667	0.00323818	-0.000559726
Jph2	-0.201466	0.288947	-0.147866	-0.0185688	-0.0180773	-0.0221124	-0.0223283	-0.0992134	-0.0113039
Oser1	0.100753	-0.0887606	0.0721165	0.0132843	0.0173508	0.00894675	0.0175522	0.0112759	0.0136754
2900093K20Rik	0.0600836	-0.0341059	0.00265302	0.00809744	0.00511532	0.00687743	0.0064322	-0.0311929	0.00492382
Fitm2	-0.22235	0.300523	-0.113962	-0.0255367	-0.0237847	-0.0297813	-0.0215864	-0.115205	-0.0160354
Ttpal	0.125741	-0.114665	0.0872788	0.0226207	0.018551	0.023411	0.0160794	0.0343336	0.00910027
Serinc3	0.36845	-0.211744	0.0231281	0.045128	0.220232	0.0540456	0.0295362	-0.109178	0.0334853
Pkig	0.016212	0.0223811	-0.0417554	-0.00760114	-0.00473309	0.286707	-0.00800321	-0.0179447	-0.000807802
Ada	0.362771	-0.286349	0.0370598	0.037773	0.0416624	0.0393225	0.0259811	-0.0757251	0.0219289
Ccn5	0.693189	-0.510929	-0.00975756	0.0716264	0.0930901	0.0842676	0.0492456	-0.19017	0.0545734
Ywhab	0.314526	-0.347062	0.27993	0.0344292	0.0307072	0.0423005	0.585904	0.109472	0.0190669
Tomm34	0.095564	-0.0654775	0.0643264	0.0142745	0.0145328	0.0133759	0.0117457	-0.000652883	0.00544882
Stk4	0.108512	-0.119602	0.148429	0.0160512	0.0189577	0.0161678	0.0187723	0.058816	0.00777518
Slpi	0.120891	-0.150424	0.363168	0.029879	0.0170664	0.0237877	0.0298196	0.0846088	0.00847103
Matn4	0.311131	-0.232237	-0.00944148	0.0271813	0.0391349	0.0361052	0.0244157	-0.0733936	0.0218588
Sdc4	0.229345	-0.238271	0.260811	0.0274191	0.0274269	0.0311715	0.0346226	0.12862	0.0168733
Sys1	0.172665	-0.15245	0.0804537	0.0189131	0.0158647	0.016123	0.0116761	0.017285	0.0116147
Dbndd2	0.17422	-0.145926	0.0207357	0.0107955	0.0181418	0.0207421	0.0191915	0.00873529	0.0114204
Pigt	0.172412	-0.13032	0.0349786	0.0232686	0.023945	0.0182264	0.0136848	-0.00886365	0.013752
Dnttip1	0.0945036	-0.0644232	0.0455191	0.0129307	0.011012	0.0152696	0.010615	0.0219536	0.00887207
Ube2c	0.291882	-0.219082	0.00689413	0.0300554	0.0361592	0.0371619	0.0241892	-0.092022	0.0206596
Snx21	0.0568873	-0.0180284	-0.025433	0.0082948	0.00919916	0.00972692	0.00552307	-0.036479	0.00386906
Acot8	0.0575395	-0.0349858	0.0168722	0.00863494	0.0142135	0.00878754	0.00545244	0.0080147	0.00579133
Zswim1	0.0502089	-0.0351542	0.0103371	0.0124761	0.00796491	0.00700737	0.00398188	0.0109635	0.00742466
Neurl2	-0.0920721	0.129726	-0.0659187	-0.00984008	-0.0120262	-0.0113351	-0.010888	-0.0676973	-0.00860295
Ctsa	0.595509	-0.439578	0.0535879	0.0653181	0.0692058	0.0709269	0.0493453	-0.129341	0.0410263
Pltp	0.497356	-0.336162	-0.0334846	0.0510219	0.0601142	0.0509151	0.0309083	-0.19316	0.0355517
Pcif1	0.154917	-0.127034	0.0534848	0.0110221	0.0236643	0.0179884	0.0103161	-0.008411	0.0139881
Zfp335	0.0914441	-0.0662549	0.0483224	0.0151768	0.00957886	0.0119309	0.0118213	-0.00949212	0.0124466
Mmp9	0.151622	-0.265553	0.67829	0.0383865	0.0211388	0.0361759	0.0414639	0.196208	0.00593256
Ncoa5	0.0996737	-0.076528	0.0419387	0.0162968	0.00825567	0.0164069	0.00815673	-0.00261231	0.0115968
Cd40	0.165489	-0.145239	0.0554245	0.0151808	0.0135366	0.0184302	0.012243	-0.018186	0.00750491
Slc35c2	0.151573	-0.114813	0.0644224	0.0166539	0.0263737	0.0283245	0.0151638	0.0015966	0.012554
Elmo2	0.186977	-0.147471	0.0553209	0.0180483	0.0220311	0.0233359	0.0211597	-0.0267005	0.0163991
Zfp334	0.0772644	-0.05978	0.0140952	0.00985343	0.00970105	0.0132043	0.00442663	-0.0127523	0.00741717
Trp53rka	0.0982089	-0.087581	0.0531384	0.0166568	0.0158299	0.0119352	0.00931785	0.0189726	0.00971277
Slc2a10	0.14468	-0.128973	0.0409135	0.0177235	0.0150469	0.0151987	0.0150841	0.00584524	0.010478
Zmynd8	0.0673892	-0.0335828	0.0160664	0.0105143	0.0118315	0.0153528	0.0056518	-0.00592908	0.00502927
Ncoa3	0.114718	-0.079814	0.0622338	0.0226614	0.0156386	0.0184372	0.0143466	-0.0227517	0.0116728
Sulf2	0.338426	-0.250434	0.021254	0.0389582	0.0498968	0.0460962	0.0257193	-0.0340608	0.0286711
Prex1	0.298495	-0.245219	0.088225	0.0310924	0.0353647	0.0342614	0.0260039	-0.0353357	0.0252325
Trp53rkb	0.0573553	-0.0548377	0.0291306	0.00678745	0.00288008	0.00785934	0.00659103	0.0112847	0.00391749
Arfgef2	0.0176336	0.00270949	0.0046182	0.00363413	0.000734729	-4.86527e-05	0.000801635	-0.0111776	-0.000547658
Cse1l	0.0328748	-0.0306817	0.0554492	0.000953825	0.00298885	0.00770786	0.00484135	0.0430816	-0.00217859
Stau1	0.157998	-0.129152	0.0494867	0.0196285	0.0156934	0.0223156	0.0146863	-0.000347737	0.0077542
Ddx27	0.12304	-0.155781	0.144004	0.0175989	0.0176154	0.0193712	0.0167597	0.0865211	0.00470878
Znfx1	0.259648	-0.206011	0.0440805	0.0259061	0.0346196	0.0320667	0.0211178	-0.0240386	0.013499
Zfas1	0.314234	-0.249274	0.0710358	0.0459411	0.0449815	0.0428076	0.0294217	-0.0220371	0.0278421
Kcnb1	-0.0391926	0.0643385	-0.04036	-0.000788173	-0.00564407	-0.00445077	-0.0039615	-0.0207642	-0.00171948
1110018N20Rik	-0.0433367	0.0585527	-0.0393265	-0.00459361	-0.00407827	-0.00122973	-0.00135287	-0.0261936	-0.00290769
Ptgis	0.423129	-0.329628	0.123421	0.0610316	0.0689589	0.0729609	0.0424382	-0.00743689	0.0414699
B4galt5	0.338429	-0.31766	0.216695	0.0433173	0.045015	0.0519552	0.0363443	0.0780129	0.0202462
Slc9a8	0.032563	-0.00183284	0.00293965	0.00474798	0.0108193	0.00764705	0.00222746	-0.000843705	0.00355736
Spata2	0.0854663	-0.0738718	0.0365978	0.00335455	0.00848018	0.00756534	0.00808689	0.0161515	0.0047353
Rnf114	0.153033	-0.0963698	0.0442707	0.0182998	0.0159887	0.0173103	0.0124998	-0.0248034	0.0109283
Snai1	0.351065	-0.321025	0.153594	0.0422361	0.0460331	0.0477139	0.0325824	0.0205073	0.0273421
Ube2v1	0.182025	-0.139376	0.118755	0.0281215	0.0248833	0.0242313	0.0214896	0.0291997	0.0198753
Tmem189	0.264232	-0.238762	0.178598	0.0279548	0.033081	0.0292994	0.0280316	0.0317186	0.0181692
Cebpb	0.315125	-0.362225	0.649897	0.0536217	0.0378149	0.0577472	0.0543714	0.170857	0.0229051
A530013C23Rik	-0.0125545	0.0164707	-0.00372207	-0.00777073	-0.00391771	-0.00425102	0.000739154	-0.0126506	-0.00251031
Ptpn1	0.306573	-0.306044	0.301434	0.0458226	0.0355695	0.0447589	0.0382907	0.0724875	0.0227374
Pard6b	0.101469	-0.092545	0.0328539	0.0125384	0.013641	0.010901	0.00784755	0.02177	0.00955152
Adnp	0.120143	-0.0843688	0.0550957	0.0242224	0.0192625	0.0198219	0.0145532	0.000755718	0.00778551
Dpm1	0.0209511	0.00125965	0.00244608	0.000745362	0.00407706	0.00896332	-0.00238795	0.00124731	0.00180906
Mocs3	0.0466977	-0.0351343	0.0283817	0.009225	0.0111438	0.00854016	0.00625359	0.0121632	0.00102327
Nfatc2	0.0340088	-0.00384643	-0.0174358	-0.00167896	0.0100387	0.00549608	0.000697222	-0.021611	0.00592062
Atp9a	0.0961046	-0.0137764	-0.0446979	0.0236055	0.0213195	0.0252631	0.0119062	-0.0561946	0.0156213
Gm14261	-0.0384209	0.0544832	-0.0327314	-0.00527813	-0.00363787	-0.00540221	-0.00402009	-0.0337988	-0.00319096
Zfp64	0.0882254	-0.0755769	0.0450517	0.00981337	0.0121362	0.0111834	0.00905426	0.00592903	0.00644136
Tshz2	0.0324541	-0.0284385	0.0169505	0.0047519	-0.00152683	0.00331238	0.00391546	0.0129752	0.00405096
Zfp217	0.0869183	-0.0775318	0.0841362	0.0173958	0.012122	0.0173191	0.0135407	0.0264102	0.00477192
Pfdn4	0.114679	-0.128819	0.109873	0.00962889	0.0164718	0.019466	0.0193227	0.0944831	0.00724903
Fam210b	0.0532113	-0.0351875	0.00952501	0.00191333	0.00886865	0.00852194	0.00687788	-0.00726514	0.00486822
Aurka	0.134534	-0.10395	0.0134899	0.0161207	0.0152593	0.0190216	0.00936893	-0.037506	0.00899164
Cstf1	0.0704979	-0.0548269	0.033006	0.014452	0.0136007	0.0113311	0.0131948	0.018251	0.00558523
Rtf2	0.182414	-0.157158	0.105784	0.0205545	0.0177915	0.0282314	0.0188836	0.0177165	0.0166948
Rae1	0.106017	-0.103085	0.0870495	0.0188961	0.0123673	0.0156832	0.0166687	0.0501	0.00654348
Rbm38	-0.125353	0.19134	-0.0712768	-0.00860272	-0.0171934	-0.0171184	-0.0109131	-0.0665435	-0.00342911
Zbp1	0.377099	-0.313158	0.1432	0.0324633	0.0397546	0.0397665	0.033361	-0.0394509	0.0227779
Pmepa1	0.578419	-0.489005	0.147087	0.0653192	0.0848632	0.080091	0.0552547	-0.00414645	0.0502632
Rab22a	0.0757562	-0.0336964	0.0190965	0.00561109	0.00981314	0.0085018	0.0109754	-0.0197573	0.00589764
Vapb	0.0303611	-0.0444507	0.00809609	-1.67261e-05	-0.000173512	-0.00054099	-0.000936994	-0.0116708	-0.00193869
Stx16	0.11471	-0.0822534	0.0443985	0.0138256	0.0112918	0.01958	0.00926597	-0.0119846	0.0102345
Npepl1	0.069996	-0.0270153	-0.0133468	0.00642263	0.47824	0.00871241	0.0039036	-0.0323573	0.00427842
Gnas	0.4788	-0.409116	0.0821936	0.0340299	0.152196	0.0458853	0.0306677	0.00660263	0.0246055
Nelfcd	-0.00425728	0.0453737	-0.0242613	0.00485896	0.00378127	0.00274008	-0.000201513	-0.0483455	0.000482589
Ctsz	0.722206	-0.595844	0.267138	0.0782035	0.0851687	0.0931821	0.0650404	-0.0597604	0.0477238
Atp5e	-0.519377	0.666862	-0.302963	-0.0838563	-0.0900022	-0.0944818	-0.0777334	-0.271863	-0.0575654
Prelid3b	0.0416921	-0.0389975	0.030366	0.00230074	0.0013303	0.00213188	0.00483886	0.040964	-0.000854119
Gm14305	0.0690777	-0.0461654	-7.43459e-06	0.00561919	0.00663411	0.0131091	0.00635946	-0.0120016	0.00704294
Gm14295	0.0538463	-0.0520168	0.00525416	0.00702649	0.00143991	0.00209372	0.00277963	0.00964935	-0.00173463
Gm14296	0.0215066	-0.00342983	-0.00165641	0.00184545	0.00372135	0.00235996	0.00366556	0.00148447	0.00357057
Gm14403	-0.00332618	0.0208283	-0.0260162	0.000105674	-0.000353916	-0.00396945	-0.00167518	-0.0254918	0.00237036
Gm14327	-0.021581	0.028708	-0.0289295	-0.00311871	-0.00452331	-0.00678265	-0.00830894	0.0029073	-0.000839848
Gm14326	0.0167159	-0.00773354	-0.00229787	-0.00243676	0.00413229	-0.000568916	0.00141969	-0.00995652	-0.00467444
Zfp931	0.056698	-0.0386613	0.00333222	0.0119931	0.00873606	0.00701945	0.00425793	-0.0255434	0.00426491
Ppp1r3d	-0.0175757	0.00383253	0.0713351	0.00023228	-0.00436961	-0.00170999	-0.000135978	0.0514726	-0.00136596
Fam217b	-0.00222687	-0.0156467	0.0556262	-5.20723e-06	-0.00173663	0.00164697	0.00120646	0.0590564	-0.000475953
Taf4	0.0287517	-0.012371	0.0208759	0.00549288	0.000778436	0.01339	0.00502334	-0.00981373	0.00592114
4921531C22Rik	-0.0139768	0.0242269	-0.0317056	-0.00740253	-0.00288606	-0.00216892	-0.00680449	-0.0388045	-0.0035872
Lsm14b	-0.0105113	0.0518394	-0.0216181	0.00854643	0.000429844	-0.000457542	-0.00333544	-0.0459373	-0.00166292
Psma7	0.217276	-0.22442	0.148389	0.0197836	0.0230166	0.0218254	0.0200264	0.0860025	0.00949515
Ss18l1	0.0305554	-0.0157546	0.00694862	0.0022209	0.00554229	0.00545902	0.00276888	-0.0015477	0.00198974
Mtg2	0.0152457	0.00561366	-0.000564899	0.526826	0.00024711	0.00880808	0.00502137	-0.0197813	-0.00305029
Osbpl2	0.0355915	0.00386949	-0.00477097	0.0113211	0.00855506	0.010945	0.00742252	-0.023763	-5.15294e-05
Adrm1	0.156158	-0.193698	0.1099	0.00840327	0.013894	0.0141284	0.0175272	0.128121	0.00691634
Lama5	0.00673129	0.0537467	-0.0501456	0.0054421	0.00221695	0.00952213	-0.00268753	-0.0670111	0.00633268
Rps21	0.84053	-0.705499	0.127175	0.0740491	0.168263	0.0870857	0.136103	-0.0485116	0.139178
Cables2	0.0667127	-0.0396929	0.0484874	0.01218	0.0174989	0.0125137	0.00562588	-0.00285971	0.0057413
B230312C02Rik	0.023189	-0.0117692	-0.00956475	0.0058147	0.0116633	0.00440362	0.00338631	-0.0113392	0.00560696
Mrgbp	0.0263484	-0.0181921	0.00983795	0.00231443	0.00639428	0.00103329	0.00105486	0.0151604	0.000593205
Ogfr	0.206812	-0.143751	0.0818289	0.0310402	0.0295487	0.0297999	0.0204582	-0.0233082	0.0205236
Dido1	0.066448	-0.0519908	0.0675108	0.00864289	0.00857677	0.0154119	0.00749979	0.023011	0.00597154
Gid8	0.03743	-0.0118554	0.0316554	0.00536081	0.000877901	0.00620359	0.00503972	-0.0175116	0.0040596
Ythdf1	0.0929477	-0.0677409	0.061224	0.0146938	0.0169554	0.0207417	0.0117496	0.0213038	0.0112998
Arfgap1	0.166096	-0.110377	0.044391	0.0303496	0.0213096	0.0297449	0.0162282	-0.0185471	0.0144019
Eef1a2	-0.441818	0.573951	-0.216021	0.0348724	-0.0409362	-0.0414857	-0.043743	-0.119053	-0.0216125
Ppdpf	0.175839	-0.102696	0.00327507	0.0151462	0.0266431	0.0242431	0.0158816	-0.0687809	0.0174789
Helz2	0.155615	-0.115003	0.071269	0.0223226	0.0163234	0.0202324	0.0142199	-0.0197936	0.0114136
Gmeb2	0.0486139	-0.0346378	0.0331577	0.00973308	0.00808222	0.00593979	0.00598838	0.0130887	0.00549636
Rtel1	0.0542489	-0.0432794	0.0311715	0.0127521	0.00538789	0.00983014	0.00509982	-0.00443353	0.00344122
Arfrp1	0.00598143	0.0335384	0.00276418	0.0039465	0.00232923	0.000359706	-0.00216881	-0.0313715	0.00230685
Zgpat	0.0367171	-0.00749068	0.00646512	0.007565	0.00412731	0.0157576	0.00343682	-0.0211185	0.00870429
Zbtb46	0.00635945	0.0295228	-0.00777741	0.00628474	0.00442536	0.00521023	0.00433526	-0.0296999	0.00522443
Tpd52l2	0.185104	-0.146455	0.051	0.0211286	0.0240771	0.0224432	0.015598	0.012824	0.010789
Dnajc5	0.105832	-0.109852	0.13324	0.0226006	0.504455	0.0178468	0.0133606	0.0638166	0.00972688
Uckl1	0.0731703	-0.0613178	0.0256066	0.0046931	0.00347245	0.01065	0.00544082	0.0153992	0.00719607
Zfp512b	0.0392345	-0.0127043	0.00389481	0.0032571	0.00365905	0.0119	0.0045979	-0.0298117	0.0059804
Prpf6	0.085968	-0.0572062	0.025533	0.0141107	0.0153171	0.00651372	0.00492849	-0.014631	0.00625224
Sox18	0.112763	-0.0838086	-0.0107592	0.0125009	0.0191117	0.0186839	0.00911409	-0.00197618	0.0151453
Tcea2	0.0342193	-0.0170425	-0.00275923	0.00136794	0.00531967	0.00650864	0.00266442	-0.0176432	0.00545945
Rgs19	0.273627	-0.26257	0.229316	0.0334559	0.0387374	0.0331279	0.0262852	0.0445803	0.0182762
Pcmtd2	-0.0274844	0.0810096	-0.0489919	-0.00480594	0.000340387	0.00388511	-0.00321623	-0.065464	0.00143822
Polr3k	0.15361	-0.13241	0.0756178	0.0215639	0.0249886	0.0211556	0.0207546	0.0195614	0.0166687
Pex2	0.039603	-0.0144491	0.0300096	0.00728975	0.00487581	0.00852323	0.00390889	0.00583392	0.00325744
Gm8797	0.0491964	-0.0349545	0.0971789	0.0147978	0.010167	0.0140878	0.00674355	0.0451283	0.00947696
Pkia	-0.118474	0.192975	-0.108972	-0.00774994	-0.0130087	-0.011391	-0.013605	-0.0937844	-0.00482886
Zc2hc1a	0.101068	-0.0867292	0.0163443	0.0119705	0.0101116	0.0103017	0.00788109	0.0170559	0.0062387
Stmn2	0.0686949	-0.052793	-0.00929369	0.0107477	0.00862848	0.00841065	0.00159859	-0.00926188	0.00522493
Hey1	0.0358216	-0.0183375	-0.00131599	0.00402506	0.00219869	0.00483982	0.00221761	-0.0160579	0.00320427
Mrps28	-0.00880632	0.0166731	-0.0152527	-0.00634379	-0.0027965	-0.0110178	-0.00845688	0.00844346	-0.00420393
Tpd52	0.374146	-0.419634	0.442808	0.0424872	0.0424429	0.0483901	0.0446115	0.198313	0.0169551
Zbtb10	0.0263466	-0.0148546	0.0256451	0.00476279	0.00703966	0.00780756	0.00770219	0.0151274	0.00342952
Zfp704	0.0749333	-0.0501217	-0.00410604	0.0113906	0.00795015	0.00756233	0.00730743	-0.0320949	0.00535749
Pag1	0.0831719	-0.0793639	0.0928054	0.0112597	0.0109926	0.0138081	0.0139405	0.0108909	0.0101638
Fabp5	0.583586	-0.44531	0.102206	0.0514632	0.0618796	0.0643212	0.0456124	-0.138732	0.0306194
Fabp4	0.0214883	0.104137	-0.152336	-0.00725839	-0.00399532	-0.00862613	-0.00725318	-0.150985	0.00354534
Impa1	0.171048	-0.137368	0.0581214	0.0194791	0.0230572	0.0221322	0.019439	0.00862009	0.00991951
Zfand1	-0.0107444	0.0489517	-0.0384021	0.00113849	0.00466915	-0.00253788	-0.00396911	-0.0506649	0.000202084
Chmp4c	-0.045025	-0.000397878	0.0228734	-0.00510693	-0.00662573	-0.00773283	-0.00441872	0.0977284	-0.00364148
Snx16	0.0411183	-0.0284868	0.0211504	-0.000899824	0.00622437	0.000967937	0.00050963	-0.00142148	0.006191
Lrrcc1	0.0852381	-0.069205	0.0149447	0.00955374	0.0183657	0.0089777	0.00979616	-0.0137456	0.00127579
E2f5	0.0947568	-0.0798794	0.0585487	0.0105019	0.0125682	0.015482	0.00992624	0.00139529	0.00664025
Rbis	0.194753	-0.206448	0.114774	0.0118382	0.0194736	0.0161789	0.0190436	0.112496	0.00876353
Car13	0.147812	-0.132579	0.06701	0.012114	0.0141693	0.00988846	0.0192201	-0.00416877	0.00226232
Car2	-0.00365057	0.00773733	0.0124513	0.00787237	0.00589172	0.0017595	-0.00304402	0.00419633	6.91003e-05
Sirpb1c	0.243701	-0.273969	0.29492	0.0262448	0.0263271	0.0317718	0.0264828	0.114228	0.00933661
Ythdf3	0.0792638	-0.0442416	0.0587668	0.0178374	0.00877567	0.0177251	0.00737295	-0.0124652	0.00897109
Cyp7b1	0.109414	-0.0898873	0.0308256	0.0141686	0.0152918	0.0144828	0.0126058	-0.00176008	0.010163
Armc1	0.0439125	-0.0481801	0.0550826	0.00350323	0.00395186	0.00595669	0.00435868	0.0292032	0.00605914
Mtfr1	0.00799534	0.0177061	-0.0127258	0.00289883	-0.00457692	0.00303004	0.00187094	-0.0302652	0.000334561
Pde7a	0.0554367	-0.0117903	-0.0222931	0.013246	0.00971807	0.0112974	0.00426345	-0.0538971	0.00439729
Trim55	-0.0437131	0.0320031	-0.0138088	-0.00464108	-0.00828449	-0.00850242	-0.0078335	0.0245688	-0.00372162
Cp	0.0907316	-0.0932434	0.0235047	0.00945167	0.00985949	0.00772378	0.009444	0.0648891	0.0073335
Hps3	0.0902821	-0.0839287	0.0679307	0.0110378	0.0112468	0.0143541	0.00875177	0.00993764	0.00678772
Hltf	0.0856561	-0.0661939	0.032169	0.00607034	0.00793498	0.00920025	0.0093843	-0.0131526	0.00563016
Gyg	-0.0229112	0.0365155	-0.0544252	-0.00560408	0.000442426	-0.000166222	-0.00494112	0.0533355	-0.00416058
Gm43672	-0.0869529	0.112818	-0.0478361	-0.0137911	-0.0128222	-0.00943536	-0.0116239	-0.0467162	-0.00529786
Tbl1xr1	0.0807796	-0.0641797	0.0970965	0.012134	0.0145396	0.0183427	0.014254	0.0122671	0.00745175
Nceh1	-0.113921	0.195258	-0.102572	-0.0106503	-0.017314	-0.0187485	-0.0129492	-0.160085	-0.00797201
Tnfsf10	0.0255387	0.00220013	-0.0136483	0.00233465	0.00313187	0.00554482	0.000274567	-0.0323247	0.00136875
Fndc3b	0.246987	-0.21667	0.0897671	0.0307916	0.507886	0.0341914	0.0240255	0.010135	0.0176955
Pld1	0.088902	-0.0668262	0.0217822	0.0130377	0.0128201	0.0122753	0.00784621	-0.0247935	0.0036074
Tnik	-0.0509705	0.0553688	-0.0210657	-0.00704407	-0.00886069	-0.00401316	-0.00758872	-0.00178947	-0.00246171
Rpl22l1	0.531704	-0.524536	0.202814	0.0480269	0.051937	0.0556613	0.0439859	0.118819	0.0250512
Mecom	0.15859	-0.163922	0.114763	0.0202311	0.0172898	0.0215715	0.0193938	0.0308984	0.0106706
Mynn	0.0499727	-0.0338221	0.0309032	0.00389116	0.00565701	0.00656738	0.00734847	-0.00722493	0.00107107
Sec62	0.219853	-0.217019	0.151887	0.0269109	0.0249802	0.0384777	0.0261783	0.0525449	0.0158261
Phc3	0.0591453	-0.0318101	0.0187625	0.0142184	0.00895614	0.0133954	0.0111977	-0.00972176	0.00590594
Prkci	0.121011	-0.112223	0.053143	0.0106169	0.0178153	0.0141657	0.011418	0.0171005	0.00723698
Skil	0.205086	-0.183923	0.1757	0.0326328	0.0308574	0.0409016	0.0302637	0.0277254	0.0229519
Zmat3	0.177611	-0.141343	0.0566595	0.0289174	0.0256361	0.0218701	0.0147068	-0.00779539	0.0179127
Pik3ca	0.077547	-0.0635559	0.0522815	0.0151391	0.00985221	0.0102729	0.0093258	-0.000513963	0.00542189
Zfp639	0.06172	-0.0505471	0.0223653	0.011197	0.007502	0.0122605	0.00709291	0.0218501	0.0036956
Mfn1	-0.22883	0.289341	-0.127537	-0.0269386	-0.0256135	-0.0278571	-0.0273404	-0.10673	-0.0136839
Gnb4	0.168281	-0.11863	0.016498	0.0347666	0.0258895	0.0271968	0.0151811	-0.020206	0.0191054
Actl6a	0.101653	-0.107422	0.0814394	0.014123	0.0134258	0.0129684	0.011141	0.037947	0.00846073
Mrpl47	-0.0437146	0.0498295	0.0270964	-0.00314366	-0.00640443	-0.00467428	-0.00603638	0.0104782	-0.000965145
Ndufb5	-0.441529	0.507224	-0.246148	-0.0676357	0.0368337	-0.0796149	-0.0622123	-0.140423	-0.0443415
Usp13	-0.173894	0.197969	-0.0889262	-0.0151871	-0.0257169	-0.0276418	-0.0177965	-0.0215197	-0.0137533
Ttc14	0.0564423	-0.0508694	0.0805591	0.0145527	0.00952751	0.013864	0.0089824	0.0119266	0.00499734
Fxr1	-0.0814951	0.11785	-0.029469	-0.00501436	-0.0143904	-0.0109008	-0.0060439	-0.0445749	-0.00924058
Dnajc19	-0.032086	0.0624153	-0.0623956	-0.01623	-0.0112529	-0.0160371	-0.0135531	-0.0645838	-0.00444478
Atp11b	0.0792835	-0.0656727	0.0789457	0.0124677	0.0089016	0.0113182	0.00998868	0.00764563	0.00854133
Dcun1d1	0.0506178	-0.0496069	0.0444401	0.00508612	0.00391643	0.00312802	0.00456324	0.0169506	-0.00302379
Mccc1	-0.0876532	0.119221	-0.0578281	-0.012731	-0.0109881	-0.0164988	-0.00737071	-0.0386049	-0.00207168
Acad9	-0.0194223	0.0453854	-0.0335526	0.000185077	-0.00363785	-0.00554432	-0.00461171	-0.0151497	0.00038856
Zfp267	0.0633001	-0.0530489	0.0275656	0.0103809	0.00922205	0.00956391	0.00250579	-0.00372942	0.00744783
Anxa5	0.5539	-0.478752	0.242479	0.198413	0.0719666	0.0802492	0.0577446	0.0384964	0.0407819
Exosc9	0.0540957	-0.0557779	0.0494992	0.013148	0.00332955	0.00850472	0.00609275	0.0385988	0.00428368
Ccna2	0.189789	-0.14828	0.0175904	0.022266	0.0249749	0.0272471	0.0215502	-0.0476372	0.0104067
Bbs7	0.0314629	-0.0243899	0.00959395	0.00226501	0.00656113	0.00164131	0.00415498	-0.0122185	0.001665
Trpc3	-0.00425251	0.0171085	-0.0212928	0.000134612	0.000507976	0.00196184	0.00120517	-0.0261846	-0.00125802
4932438A13Rik	0.0319238	-0.0168924	0.0378691	0.0127881	0.00848541	0.00965045	0.0108202	0.00470851	0.00391248
Fgf2	0.115966	-0.127965	0.172449	0.0222254	0.017379	0.0255813	0.0213434	0.0781272	0.0112136
Nudt6	-0.0398097	0.0665397	-0.0383567	-0.00539053	-0.00216439	-0.00737456	-0.00525634	-0.0343169	-0.00454067
Spata5	0.042047	-0.0547847	0.0933169	0.00962113	0.0038567	0.00858306	0.00781623	0.0506813	0.00355563
Spry1	0.0589449	-0.0506809	-0.0172922	0.00350989	0.00725299	0.00810851	0.001645	-0.0349542	0.00278981
Ankrd50	0.087137	-0.0717087	0.0554255	0.0164669	0.0112936	0.0107994	0.00927988	0.012049	0.00703274
Fat4	0.0851986	-0.0571697	-0.00224086	0.00404461	0.00816608	0.00739373	0.0100254	-0.0119712	0.00742358
Intu	-0.0364698	0.0406607	-0.0350129	-0.00705229	-0.00450883	-0.00381204	-0.00572292	-0.01334	-0.00226217
Hspa4l	-0.0471457	0.0759734	-0.0252555	-0.000459963	-0.00434616	-0.00125038	-0.00629491	-0.0310168	-0.00242943
Plk4	0.105156	-0.101437	0.0403803	0.0130639	0.00886205	0.0092883	0.00842995	0.00596943	0.00552452
Mfsd8	0.00916731	-0.00340003	0.00864918	-0.00476467	0.0138907	0.0127668	-0.00369504	0.00673974	-0.000612321
Abhd18	-0.0917808	0.131715	-0.0520091	-0.0112147	-0.0101476	-0.0125315	-0.00721275	-0.0621126	-0.00684041
Larp1b	-0.0730259	0.0543928	-0.0214009	-0.0126437	-0.0186967	-0.0142515	-0.00765311	0.041395	-0.0106461
Pgrmc2	0.101076	-0.0813229	0.0291662	0.0175396	0.0180598	0.0143959	0.00833974	0.0105335	0.00798842
Jade1	0.0350976	-0.0242656	0.0412099	0.00547734	0.00674939	0.00741392	0.00926316	-0.00436755	0.00359217
Sclt1	0.0348792	-0.0285029	0.00824734	0.00788019	0.00925226	0.000219499	0.00570433	0.000586665	0.00653747
D3Ertd751e	-0.0230084	0.0408969	-0.023027	-0.00142099	-0.00670025	-0.000335793	-0.00395179	-0.0201514	-0.00542809
Pcdh18	0.123083	-0.0798948	-0.0109692	0.715548	0.0118376	0.0200516	0.0122531	-0.0409058	0.0116964
Noct	0.00755832	-0.011698	0.14713	0.00444112	-0.0051146	0.00866777	0.0090633	0.0500648	-0.00246055
Elf2	0.0790219	-0.0508915	0.0421684	0.00976635	0.0126147	0.624757	0.00817797	-0.0143789	0.009262
Ndufc1	-0.510895	0.58268	-0.330312	-0.0330383	-0.0893656	-0.0956873	-0.0741468	-0.194647	-0.0570321
Naa15	0.015555	-0.065071	0.143579	0.00994267	-0.000146127	0.00822113	0.00812139	0.118263	-0.00142762
Rab33b	0.0935482	-0.0769592	0.0563458	0.0150276	0.0124287	0.0167072	0.012533	0.0151572	0.00880023
Setd7	0.115211	-0.100648	0.0445221	0.0200815	0.0161244	0.020055	0.0093986	0.0361396	0.00779423
Maml3	0.054143	-0.0510675	0.0410689	0.00967539	0.00862419	0.00631856	0.00773997	0.0164814	0.00293236
Foxo1	0.0589806	-0.0441449	0.0448533	0.0106425	0.00910354	0.00992561	0.00796301	-0.00493808	0.0030012
Cog6	0.00881489	0.040609	-0.0381333	0.0124201	0.00481918	0.00052248	-0.000976139	-0.0514387	0.0059297
Lhfp	0.427741	-0.309326	0.00678212	0.0500582	0.059084	0.0610904	0.0369153	-0.0895647	0.0397146
Nhlrc3	0.11872	-0.0918249	0.0450546	0.0176929	0.0144166	0.0155138	0.0108405	-0.00132229	0.00802346
Proser1	0.0455278	-0.0290565	0.0139141	0.0140424	0.00552469	0.00385226	0.00423737	-0.0100928	0.00434027
Frem2	-0.0247855	0.0402005	-0.0205016	-0.00192679	0.00106047	-0.0012449	-0.00167301	-0.0221265	0.00364991
Gm30735	-0.0300264	0.0423077	-0.0391684	-0.00613701	-0.0060046	-0.0078923	-0.0038864	-0.0125767	-0.00422975
Ufm1	0.260138	-0.249922	0.138779	0.0315401	0.0299726	0.0318009	0.0245836	0.0743668	0.0143625
Postn	0.792128	-0.607855	-0.0138132	0.101294	0.0989668	0.0951955	0.0592985	-0.161518	0.0648835
Supt20	0.108265	-0.0809269	0.0663358	0.0202361	0.0176899	0.0184842	0.0144278	0.00416214	0.005103
Exosc8	0.10335	-0.107767	0.0912382	0.00936823	0.0117965	0.00997218	0.0152277	0.0406451	0.00219965
Alg5	0.205811	-0.16766	0.0596368	0.0189101	0.0272458	0.0352721	0.015307	-0.00741776	0.0103664
Rfxap	0.0968714	-0.0770605	0.0349101	0.011341	0.00583314	0.0154184	0.0109509	0.0133151	0.00896221
Spg20	0.0815263	-0.0722004	0.0389551	0.00780817	0.00984936	0.0112057	0.00981226	0.0339049	0.0123631
Dclk1	0.315712	-0.264495	0.0927371	0.0344112	0.0350999	0.039591	0.0363932	-0.0233744	0.024425
Nbea	0.125581	-0.0932325	-0.00264278	0.00851304	0.0247715	0.010511	0.00780111	-0.0378494	0.00574192
Tm4sf1	0.392539	-0.43617	0.41084	0.0559277	0.0519505	0.066916	0.0570846	0.215504	0.0295928
Wwtr1	0.192932	-0.154155	0.0790046	0.0269845	0.0269097	0.0335868	0.0191533	0.00128234	0.0172557
Commd2	0.174432	-0.163172	0.0753698	0.0225869	0.0171619	0.0194338	0.0127821	0.0278151	0.0102026
Rnf13	0.0857483	-0.0355823	0.0248239	0.0127949	0.0117327	0.0141679	0.00515671	-0.0343805	0.00747567
Pfn2	0.0213502	-0.0249252	0.00535807	0.00345087	0.00293832	0.00477314	0.00348008	0.0230194	0.00248316
Tsc22d2	0.068968	-0.0920457	0.104285	0.00572576	0.00883219	0.0117681	0.0086961	0.0905725	0.000383063
Serp1	0.454743	-0.460784	0.412924	0.0569467	0.058255	0.0658947	0.0526532	0.126077	0.0312657
Eif2a	0.106876	-0.121346	0.0911031	0.00943763	0.0115134	0.0100739	0.0109888	0.0642418	0.00494822
Selenot	0.152388	-0.123944	0.0969803	0.0223098	0.0152537	0.0174204	0.0154055	0.02535	0.00805015
Siah2	0.085399	-0.0845717	0.0681952	0.00717103	0.0116665	0.00853322	0.00893388	0.0391446	0.00321583
P2ry14	0.0427923	-0.0155964	-0.0145891	0.00177392	0.00694763	0.00196067	0.000249561	-0.0419553	-0.000495341
P2ry12	0.1031	-0.0921562	0.0478992	0.00654197	0.0166482	0.00841618	0.00770267	-0.00372025	0.00495772
Igsf10	0.23237	-0.16222	-0.00895078	0.0265466	0.030931	0.0321732	0.0182284	-0.0576967	0.0226518
Mbnl1	0.178676	-0.160929	0.148019	0.0316115	0.0253119	0.0304412	0.0200043	0.0452924	0.0135669
P2ry1	-0.0848852	0.102137	-0.0371154	-0.0127949	-0.0158416	-0.0132118	-0.0121059	-0.0555423	-0.00800713
Rap2b	0.244583	-0.216782	0.136018	0.0271705	0.0328321	0.0346274	0.0212163	0.00948973	0.0165234
Dhx36	0.0720771	-0.0532283	0.0470697	0.0150949	0.00247957	0.0198727	0.00683191	-0.00745324	0.0101114
Mme	-0.0189349	0.035239	-0.0270338	0.00347944	-0.00563199	-0.00392907	-0.00144511	-0.0356964	-0.00220364
Strit1	-0.206706	0.173904	-0.0638122	-0.0366584	-0.0412855	-0.0453086	-0.0259047	-0.00242471	-0.0277811
E130311K13Rik	0.0400183	-0.0297628	-0.0150809	0.00537895	0.00192754	0.0121954	0.00111746	-0.0119576	0.0109635
Slc33a1	0.114225	-0.11432	0.0619798	0.0108857	0.0147752	0.0156057	0.0137637	0.046302	0.00846647
Gmps	0.0116306	0.00253638	0.0509562	0.00955062	0.00401424	0.00253028	0.00319038	0.00945177	-0.00352329
Ssr3	0.338404	-0.322462	0.22127	0.0414972	0.0401188	0.0485228	0.0309256	0.0939967	0.0260079
Tiparp	0.0807989	-0.113848	0.189889	0.014989	0.0100444	0.0141578	0.0167678	0.091487	0.00761029
Ccnl1	0.137775	-0.138335	0.165228	0.0215937	0.0250413	0.0227762	0.0231828	0.0287663	0.0106222
Ptx3	0.140787	-0.153768	0.114368	0.0151367	0.0186785	0.0198383	0.021456	0.0495403	0.00821391
Rsrc1	0.111385	-0.0962458	0.0579459	0.0102894	0.0113829	0.0082973	0.00977394	0.0053764	0.0086135
Mlf1	-0.228926	0.306108	-0.155655	-0.0284828	-0.0311148	-0.0346879	-0.03114	-0.19071	-0.0184028
Gfm1	-0.0923807	0.127808	-0.0300699	-0.0102702	-0.0146508	-0.0137082	-0.0127149	-0.0280599	-0.00772365
Lxn	0.303788	-0.244554	0.061406	0.0288229	0.0333285	0.0388182	0.0297577	-0.0396825	0.0279241
Mfsd1	0.35614	-0.290259	0.103241	0.0386832	0.0438157	0.0506446	0.0301353	-0.0381961	0.0215294
Schip1	-0.076989	0.103716	-0.00250595	-0.00572968	-0.00921813	-0.00678036	-0.00248711	-0.0102595	-0.00683637
Ift80	0.0727817	-0.0572215	0.0336392	0.0124575	0.0081925	0.0138698	0.0106519	0.00331626	0.00676175
Smc4	0.205697	-0.176409	0.0672006	0.0227727	0.0250497	0.0326173	0.0205898	-0.0183785	0.0135817
Trim59	0.1635	-0.127587	0.03713	0.0163226	0.0180747	0.0291507	0.0137808	-0.0320848	0.0128995
Kpna4	0.0980728	-0.101945	0.134705	0.021963	0.0121278	0.0102124	0.0114063	0.0588186	0.00350128
Ppm1l	-0.0853303	0.101602	-0.0226064	-0.0118214	-0.0120425	-0.0132614	-0.0101383	-0.0327321	-0.00744344
B3galnt1	0.16568	-0.122545	0.0122038	0.0148928	0.0207132	0.0212722	0.0155314	-0.042535	0.0104234
Nmd3	0.0518279	-0.0932519	0.10966	0.00752082	0.0033986	0.00640495	0.0105587	0.10437	0.0028119
Bche	-0.0564903	0.0807598	-0.0405814	-0.00419928	-0.00326451	-0.00253714	-0.00615693	-0.0226916	0.000817777
Pdcd10	0.187492	-0.180101	0.132533	0.0238026	0.0260721	0.0295348	0.0202364	0.0325265	0.011525
Serpini1	0.0757229	-0.039345	-0.0138521	0.0115778	0.0100115	0.00964815	0.00710502	-0.0389493	0.00629677
Golim4	0.211525	-0.171606	0.0536218	0.0324311	0.0267708	0.0334452	0.0202204	-0.0171961	0.0197386
Rapgef2	0.0366536	-0.00862501	0.00183205	0.00944548	0.00452945	0.00759439	0.00467113	-0.0283517	0.00402238
Fnip2	0.123261	-0.117128	0.124622	0.0169269	0.0152056	0.0199619	0.0189376	0.0191817	0.00700921
Ppid	0.0585939	-0.069101	0.119611	0.0153193	0.00579888	0.0199186	0.00961815	0.0819532	0.0056208
Etfdh	-0.296473	0.362396	-0.181716	-0.0506756	-0.045484	-0.0536524	-0.0417303	-0.153273	-0.0298762
Tmem144	-0.0613716	0.0684735	-0.0463651	-0.0027048	-0.00608144	-0.00700766	-0.00974863	0.0151824	-0.00423166
Gask1b	0.421849	-0.352201	0.0168692	0.0405848	0.05055	0.0464565	0.0295685	0.0152746	0.035758
Pdgfc	0.139584	-0.0999573	0.0109184	0.0225815	0.0219237	0.0211488	0.0151005	-0.0281785	0.0122796
Ctso	0.14943	-0.104855	0.0311234	0.0200694	0.0129572	0.0277328	0.0105994	-0.0453191	0.0112001
Gucy1b1	0.148952	-0.0976472	-0.0119241	0.0173656	0.0242983	0.025784	0.0193196	-0.054777	0.0138943
Gucy1a1	0.253668	-0.176485	-0.0151082	0.0263909	0.0360936	0.0337363	0.0248993	-0.081945	0.0242629
Plrg1	0.0781187	-0.0593533	0.0737572	0.0141248	0.00703259	0.0140974	0.00729334	0.0178809	0.00761873
Sfrp2	0.662473	-0.489766	-0.0124023	0.0732923	0.0863985	0.078969	0.0486638	-0.174009	0.0558148
Tlr2	0.244944	-0.22898	0.253748	0.0338168	0.0279412	0.0398531	0.0308487	0.0425346	0.0162489
Tmem131l	0.0185258	0.00182815	0.0485449	0.00207092	0.000862978	0.00259564	0.00599336	-0.0181944	-0.000545168
Mnd1	0.0342482	-0.0200021	-0.0070672	0.00229734	0.00219085	0.0059259	0.00136988	-0.0181546	0.00354479
Trim2	0.085256	-0.058718	0.00899714	0.0129442	0.013914	0.011062	0.00680999	-0.0195776	0.00987981
Arfip1	0.162669	-0.129404	0.0508068	0.0268854	0.0204502	0.023407	0.0184817	0.0197805	0.0158501
Tmem154	0.107628	-0.139772	0.28194	0.0202394	0.0113667	0.0151917	0.0222895	0.0570552	0.0081199
Fbxw7	-0.0664849	0.0808535	-0.0138356	-0.0130706	-0.0100764	-0.0116941	-0.0105603	-0.0353392	-0.0074
Gatb	-0.082134	0.11273	-0.0414331	-0.0126591	-0.0095956	-0.0106553	-0.0108123	-0.0335474	-0.00688622
Fam160a1	-0.0610811	0.077579	-0.0388641	-0.0111662	-0.0109817	-0.0053773	-0.0111951	-0.00973472	-0.000856475
Sh3d19	0.162472	-0.100445	-0.00226411	0.0226188	0.0224811	0.0216217	0.0156091	-0.0512839	0.0190275
Rps3a1	0.751933	-0.706248	0.281443	0.0731494	0.078708	0.24237	0.0613832	0.108469	0.0438848
Lrba	-0.00131816	0.0156222	-0.023982	0.000993469	0.00161745	0.00188717	-0.00373281	-0.0271814	-0.000933262
Kirrel	0.189671	-0.157787	0.0375079	0.0249948	0.0254328	0.0245011	0.0177102	-0.0239142	0.0121382
Fcrls	0.588785	-0.435857	-0.00255537	0.0494133	0.0725112	0.0731116	0.0418122	-0.152281	0.0469113
Etv3	0.105528	-0.0890522	0.0614728	0.00960347	0.0113737	0.0126005	0.0113098	0.0106047	0.00497585
Arhgef11	0.0804729	-0.0579191	0.0274171	0.0092183	0.0101578	0.0103914	0.00990617	-0.00340751	0.00630419
Pear1	0.167095	-0.116262	0.030863	0.0337184	0.0257338	0.0264414	0.0182265	-0.0352922	0.0139725
Prcc	0.035822	-0.0302044	0.0178056	0.00014551	0.00519176	0.00964567	0.000978164	0.00106689	-0.000506158
Hdgf	0.178895	-0.193232	0.202673	0.319247	0.0207265	0.0292864	0.024115	0.091204	0.013191
Mrpl24	0.11153	-0.0587534	-0.00476881	0.0186854	0.0118272	0.0158321	0.00463144	-0.0519364	0.0109054
Rrnad1	0.0528278	-0.0278195	0.0219336	0.00919592	0.00448354	0.0104027	0.00387377	-0.0260273	0.00498091
Isg20l2	0.0899631	-0.0985138	0.0866374	0.012438	0.0117905	0.0166435	0.0115208	0.0458301	0.00505456
Nes	0.149121	-0.224072	0.225263	0.020575	0.0206927	0.0254578	0.0231347	0.251848	0.00633737
Gpatch4	0.0514662	-0.119792	0.15137	0.00635084	0.00290939	0.00975126	0.00994302	0.162843	-0.000984051
Naxe	0.111509	-0.0390701	-0.0529932	0.00712828	0.0129369	0.0172163	0.00619564	-0.0802912	0.00705038
Iqgap3	0.0477421	-0.0446554	0.0117732	-0.000544209	0.912564	0.000522879	0.000818791	0.000843559	-0.00212802
Mef2d	0.0309604	-0.00341859	0.0429865	0.00557586	0.00795271	0.0137061	0.00279504	0.0255978	0.00351001
Tsacc	0.00731768	0.0142306	-0.0381737	1.25042e-06	0.000377683	-0.000408405	-0.00277777	-0.0382873	-0.00127038
Cct3	0.173154	-0.211848	0.184485	0.0233166	0.0213751	0.0299719	0.0259135	0.199855	0.00864885
Glmp	0.381028	-0.266979	0.0365442	0.0453585	0.0487372	0.0487974	0.0293811	-0.103322	0.0344304
Smg5	0.0601555	-0.0220847	0.0220595	0.0116963	0.0137238	0.0141664	0.00761498	-0.00353221	0.00684151
Pmf1	0.0921487	-0.0632242	0.0239503	0.0103187	0.0112247	0.00889589	0.0114066	-0.0242563	0.00385974
Slc25a44	0.0745747	-0.0659843	0.0663645	0.0139366	0.00718169	0.00888805	0.0123608	0.0232878	0.00246055
Sema4a	0.106523	-0.148889	0.365471	0.0245283	0.0138681	0.0234232	0.023645	0.104999	0.00842703
Lmna	0.418178	-0.403184	0.26514	0.0529042	0.0573674	0.0660733	0.051366	0.180352	0.0329298
Lamtor2	0.249122	-0.176432	-0.0106257	0.0170059	0.0183232	0.0205412	0.0128429	-0.0789359	0.012136
Ubqln4	0.0149898	-0.00277866	0.0381691	0.0052786	-0.00019094	0.00201281	0.0050266	0.0259986	0.00279063
Ssr2	0.543072	-0.459498	0.126846	0.0619958	0.0688641	0.0642434	0.0446498	0.00528002	0.0366555
Arhgef2	0.192079	-0.176414	0.137228	0.0259828	0.0314221	0.0315989	0.0229741	0.0149489	0.020693
Khdc4	0.0947403	-0.0714268	0.0500988	0.0231673	0.0207819	0.0143039	0.00774155	0.000147625	0.00747703
Rit1	0.112786	-0.0590033	0.0034485	0.0128037	0.017763	0.0112262	0.0103695	-0.0404388	0.0108112
Syt11	0.135059	-0.104787	0.0238746	0.0166631	0.0153727	0.0148462	0.0122981	-0.0091239	0.0104774
Gon4l	0.0717533	-0.0603194	0.0421102	0.0144329	0.00718802	0.0109432	0.00968286	0.0148061	0.00620373
Msto1	0.084271	-0.0728246	0.0396614	0.00507702	0.0132698	0.0172811	0.0107312	-0.00103873	0.0074353
Dap3	-0.0488378	0.0991144	-0.0122778	0.00246687	0.00058121	0.00141702	-0.00463013	-0.0506663	-0.00335711
Ash1l	0.0523709	-0.0562226	0.0973735	0.0106396	0.00713227	0.00697084	0.00150821	0.0334041	0.00167972
Rusc1	0.0978305	-0.0679803	0.0347274	0.0145557	0.0135065	0.017957	0.0105367	-0.00183751	0.00815147
Fdps	0.117436	-0.102734	0.0810559	0.0194412	0.0225263	0.026836	0.0152922	0.00428382	0.0113949
Clk2	0.0945702	-0.0499598	0.00275061	0.0180639	0.0111543	0.0145164	0.0117891	-0.0369706	0.013298
Scamp3	0.186511	-0.143963	0.055485	0.0275956	0.0281021	0.0256539	0.0157643	0.00384216	0.0141656
Fam189b	0.209245	-0.153283	0.0167885	0.0267086	0.02865	0.0286488	0.014964	-0.0452658	0.0152553
Gba	0.313311	-0.243906	0.111421	0.0402008	0.039697	0.0416863	0.0277801	-0.0234595	0.0198395
Mtx1	0.0741677	-0.0437177	0.025345	0.0146469	0.0122731	0.0156763	0.00334114	-0.0205606	0.00135181
Thbs3	0.0688698	-0.0652017	-0.0088162	0.00549834	0.00616449	0.00644228	0.0031529	-0.0303775	0.00250392
Trim46	0.145695	-0.0985667	-0.00596707	0.0190452	0.0172967	0.0232813	0.00882592	-0.0394331	0.0112398
Krtcap2	0.411584	-0.367029	0.164579	0.042422	0.0479153	0.334506	0.0345679	0.0497523	0.0300602
Dpm3	0.35482	-0.266076	0.0362991	0.0403379	0.0442728	0.0366591	0.0265025	-0.0518934	0.0311082
Slc50a1	0.239048	-0.182368	0.0161934	0.0288125	0.0283767	0.0330695	0.0179148	-0.0356928	0.0184274
Efna1	0.0344832	0.0100435	-0.00657478	0.0105071	0.00479459	0.0129271	0.00521904	-0.0337399	0.00330268
Adam15	0.319571	-0.248904	0.0643897	0.0415744	0.0418217	0.0351543	0.0288184	-0.0183651	0.0264422
Zbtb7b	0.140068	-0.120953	0.0830513	0.0155637	0.0184183	0.0258356	0.0172268	0.0271496	0.0125691
Gm15417	-0.0993793	0.130745	-0.0756188	-0.0208754	-0.0133558	-0.0225217	-0.0172984	-0.0568727	-0.00746923
Flad1	-0.0706536	0.115103	-0.0588535	-0.00485515	-0.00811386	-0.00598602	-0.00900549	-0.0665044	0.000550753
Cks1b	0.197423	-0.186771	0.0551643	0.0123409	0.694752	0.0272814	0.0162436	0.0259764	0.00895942
Shc1	0.217326	-0.197879	0.103411	0.0372971	0.0283905	0.0323559	0.0249638	0.0479385	0.018724
Pygo2	0.151204	-0.128393	0.0618439	0.0204473	0.0262214	0.0211994	0.0147168	0.0107172	0.0110694
Pbxip1	0.140151	-0.0922068	0.042663	0.0175651	0.018629	0.020493	0.0125227	-0.04037	0.0118675
Pmvk	0.0618482	-0.0374451	0.0109509	0.00820657	0.0112729	0.01116	0.00635882	-0.0279208	0.00880151
Adar	0.223501	-0.171639	0.0871797	0.0239304	0.0248268	0.0256858	0.0234059	-0.0218669	0.0212978
4632404H12Rik	-0.0136547	0.00969753	-0.00876915	-0.00271246	-0.00157927	-0.00593771	0.000384944	0.000779958	0.00178113
Ube2q1	0.24269	-0.210402	0.135216	0.0293146	0.0394479	0.03371	0.0301348	0.0246262	0.0173646
She	0.0315899	-0.0272403	0.0802521	0.00361866	0.00221674	0.00439211	0.00363023	0.0268461	0.000676087
Il6ra	0.111775	-0.132176	0.235395	0.0221488	0.0115701	0.0197229	0.0217038	0.0636975	0.00600386
Atp8b2	0.177285	-0.136354	0.0360152	0.022541	0.668044	0.0214424	0.0146372	-0.0144265	0.0146284
Hax1	0.162288	-0.171363	0.131046	0.0196504	0.0172481	0.0211524	0.0200369	0.0951715	0.0105953
Ubap2l	0.134217	-0.114998	0.0958449	0.0237721	0.0181705	0.0210674	0.0132189	0.039677	0.0151923
4933434E20Rik	0.0452817	-0.0363727	0.0264282	-0.000716246	0.000361999	0.00785072	-0.00358138	-0.0220623	-0.00414142
1700094D03Rik	0.032528	-0.0186696	0.0220716	0.00864771	0.00677163	0.00413632	0.00483208	-0.0140581	0.004775
Tpm3	0.492637	-0.537765	0.512538	0.0665247	0.056015	0.0690738	0.0620328	0.19899	0.0258083
Rps27	0.826728	-0.758707	0.197569	0.0686711	0.0826177	0.083303	0.0612722	0.0569695	0.0472279
Rab13	0.221327	-0.171772	0.00868316	0.0253742	0.0262025	0.0222164	0.0175817	-0.0397912	0.0161817
Jtb	0.109239	-0.0774317	0.0238636	0.0180666	0.0173129	0.0116943	0.0103411	-0.0131596	0.00609124
Slc39a1	0.311466	-0.275148	0.124809	0.0365748	0.0358525	0.0407371	0.0274311	0.0537594	0.0211659
Crtc2	0.112316	-0.107785	0.0797979	0.0125348	0.0177543	0.0153243	0.011976	0.0174809	0.0090135
Dennd4b	-0.00510512	0.0392116	0.0172868	-0.000520317	0.00370469	0.00144383	0.00362162	-0.030647	-0.0050089
Gatad2b	0.0542044	-0.0407333	0.0698382	0.0163221	0.00980574	0.0118027	0.00599888	0.000917141	0.00378448
Slc27a3	0.248168	-0.186564	0.00956518	0.0296183	0.0341145	0.0271718	0.0177405	-0.05652	0.0175305
Ints3	0.141964	-0.124128	0.0424175	0.0138145	0.0148732	0.0201737	0.0118415	0.0162659	0.00734099
Npr1	0.0398338	-0.00408111	-0.00376558	0.00843051	0.00436793	0.0046903	0.00147213	-0.0179763	0.00550206
Ilf2	0.106454	-0.104941	0.0894595	0.0165421	0.0146732	0.0169284	0.0148127	0.0456421	0.00666557
Snapin	0.0800656	-0.0434893	-0.0143851	0.0063621	0.015335	0.00810076	0.00304079	-0.019155	0.0116874
Chtop	0.110434	-0.108319	0.120259	0.0156837	0.0103871	0.0234893	0.0171219	0.0640703	0.00622374
S100a1	-0.367465	0.4763	-0.285058	-0.0443192	-0.0429492	-0.050288	-0.0514103	-0.152179	-0.0199265
S100a13	0.335199	-0.256377	0.0614497	0.0372034	0.0420619	0.0471141	0.0280932	-0.0251896	0.0273107
S100a16	0.282461	-0.255546	0.106482	0.026875	0.034257	0.0340096	0.0259359	0.0645253	0.0231288
S100a4	0.506368	-0.536284	0.516871	0.0590266	0.0526653	0.0665424	0.0576886	0.186958	0.0275455
S100a6	0.811724	-0.75771	0.449203	0.0897769	0.0957303	0.103867	0.0791875	0.09494	0.0557801
S100a8	0.1469	-0.283125	0.790922	0.0366661	0.0187974	0.0337696	0.165515	0.233104	0.0059093
S100a9	0.144063	-0.277792	0.791238	0.035902	0.0167576	0.033179	0.0464275	0.234253	0.0066464
Gm9774	0.00980351	0.00349323	0.00506683	-0.00209956	0.00224941	0.00422276	0.00558128	0.012012	0.00774153
Sprr1a	0.364199	-0.336687	0.0582088	0.0371878	0.045724	0.0451955	0.0322766	0.101722	0.0326072
S100a11	0.781285	-0.719385	0.411588	0.0891647	0.0994759	0.106779	0.0792672	0.0855779	0.056054
S100a10	0.555177	-0.545397	0.388215	0.068283	0.0694587	0.0763638	0.0617398	0.157574	0.035756
Them4	-0.0229091	0.0271626	0.00725966	-0.00411004	-0.00135696	-0.000412497	-0.00207957	0.00266519	0.0005321
Rorc	-0.0747951	0.075582	-0.0417557	-0.0117791	-0.0112589	-0.0116229	-0.00912627	-0.0193691	-0.0076958
Tdrkh	0.01342	-0.0241229	2.62561e-05	0.000289715	0.00135775	-0.00280417	-0.0010694	0.0120026	0.00174034
Mrpl9	-0.00663293	0.0147121	-0.00712932	-0.00720471	-0.00359213	-0.00906292	-0.0051757	-0.0024624	0.000672811
Snx27	0.096053	-0.0760699	0.0554109	0.013608	0.01543	0.0203405	0.0121967	-0.004499	0.00570613
Pogz	0.040816	-0.0174479	0.00928656	0.00288512	0.00596346	0.0116763	0.00694929	-0.0162963	0.00570017
Psmb4	0.205123	-0.150393	0.124042	0.0221342	0.0224538	0.27632	0.0235425	0.0392092	0.0208082
Selenbp1	-0.1154	0.184331	-0.0892464	-0.0112708	-0.0136266	-0.0198768	-0.0181142	-0.126877	-0.00908814
Rfx5	0.062669	-0.0334504	0.00829203	0.0160928	0.00852673	0.00974076	0.00540461	-0.0139948	0.00617006
Pi4kb	0.0816762	-0.107634	0.0442772	0.00383026	0.00514138	0.00747582	0.0041339	0.0491626	0.00354995
Zfp687	0.0736089	-0.0582572	0.0350021	0.00981013	0.00787869	0.014795	0.00936014	-0.0119249	0.010773
Psmd4	0.105006	-0.110335	0.109977	0.0136799	0.384641	0.015872	0.0137362	0.0810801	0.00539943
Pip5k1a	0.0905726	-0.0939918	0.0950077	0.01652	0.0170157	0.0188021	0.0182297	0.0507035	0.0101655
Vps72	0.116845	-0.0973284	0.0593102	0.0186534	0.0154307	0.0207942	0.0143403	0.0172645	0.0092461
Tmod4	-0.0820869	0.105757	-0.0502056	-0.00784696	-0.00886961	-0.0109662	-0.00573732	-0.0574912	-0.00477197
Scnm1	0.0536422	-0.0166922	-0.00728453	0.0034213	0.00611414	0.0118389	0.0038249	-0.0281908	0.006819
Lysmd1	0.036082	-0.0207462	0.0161687	0.00145544	0.00564416	0.00447882	0.00258366	-0.00490674	0.00528026
Tnfaip8l2	0.381259	-0.314339	0.125564	0.0449376	0.0440402	0.0435946	0.0328659	-0.0536245	0.0219668
Sema6c	0.0722076	-0.0354679	-0.0140348	0.00391425	0.00847491	0.00971675	0.00378677	-0.0455803	0.00524371
Gabpb2	0.0655717	-0.0571283	0.082752	0.0116364	0.0047985	0.012609	0.0119602	0.0205283	0.00350301
Mllt11	0.0759942	-0.103213	0.066209	0.00743833	0.0160012	0.0107725	0.00957332	0.110817	0.00648201
Cdc42se1	0.291583	-0.286986	0.228463	0.0346059	0.0379969	0.0415081	0.0265025	0.0641665	0.0169014
Prune1	-0.00315951	0.0102599	0.0242495	0.00467923	0.00381285	-0.00191216	0.00459211	0.00534299	-0.00211668
Mindy1	0.139762	-0.132134	0.122684	0.0202609	0.0180962	0.0254196	0.0140505	0.035302	0.008941
Cers2	0.301549	-0.303218	0.246819	0.0414296	0.0430423	0.0375761	0.0361724	0.0982634	0.0154552
Setdb1	0.073887	-0.0597189	0.0194587	0.00552919	0.00672251	0.813968	0.00207378	-0.0118792	0.00887319
Arnt	0.0701161	-0.0427351	0.0415179	0.00936008	0.00976518	0.0105109	0.0103968	-0.00264524	0.00251835
Ctsk	0.491627	-0.377963	0.0165415	0.0509996	0.0590163	0.0597752	0.0367329	-0.104292	0.0397624
Ctss	0.736408	-0.59384	0.170409	0.0688964	0.0781511	0.0793706	0.057793	-0.113322	0.0378975
Golph3l	0.103728	-0.078563	0.0346028	0.0129065	0.0141799	0.00883735	0.00759033	-0.00989719	0.0127981
Ensa	0.126032	-0.081368	0.0303653	0.0194236	0.019822	0.0177854	0.0125344	0.00900812	0.0124974
Mcl1	0.316037	-0.321251	0.418948	0.200656	0.0416562	0.0537785	0.0446824	0.149977	0.0230461
Adamtsl4	0.0891453	-0.0378613	0.0105476	0.0148696	0.0094001	0.0128105	0.00739968	-0.0277367	0.00370724
Ecm1	0.55324	-0.410819	0.0895233	0.0645115	0.074891	0.0763083	0.0525365	-0.105906	0.0469563
Tars2	-0.00716641	0.0242841	-0.00921083	-0.00366398	-0.00416351	-0.000595392	-0.00394457	-0.0145278	-0.00143831
Rprd2	0.0503607	-0.0412316	0.0294156	0.00639021	0.00526354	0.00986922	0.00661674	0.0115845	0.0029263
Prpf3	0.0665361	-0.0623169	0.0567538	0.00726659	0.00509258	0.0100487	0.00853375	0.018589	0.00637729
Mrps21	-0.0146605	0.0910223	-0.11365	-0.0203139	-0.0178324	-0.0227889	-0.0211765	-0.129048	-0.0144353
Ciart	-0.0125736	0.0128363	0.0201421	0.00150321	-0.00368741	0.000375522	-0.00136583	0.000575685	-0.00194984
BC028528	0.193092	-0.146728	0.0105148	0.0165756	0.0224685	0.0191042	0.0167791	-0.0387911	0.0146038
Aph1a	0.132775	-0.10358	0.0203272	0.0106466	0.0163881	0.0129009	0.00899347	-0.0115722	0.745448
Car14	-0.234143	0.296323	-0.149734	-0.0336714	-0.0295783	-0.0410707	-0.0312947	-0.159555	-0.0210547
Anp32e	0.0376732	-0.048475	0.0864173	0.00608926	0.00618355	0.00561823	0.00898445	0.0873433	-0.00057529
Plekho1	0.289981	-0.268526	0.0879508	0.0316119	0.0364931	0.0355349	0.0283639	0.0937132	0.0190114
Vps45	0.0313532	-0.00211374	-0.00547408	0.00708908	0.00571771	0.00636147	0.001554	-0.0371073	0.00236875
Otud7b	0.0920123	-0.0702047	0.0398139	0.0120487	0.0163061	0.0116359	0.00687498	0.0118258	0.00770379
Mtmr11	0.134296	-0.105674	0.0216112	0.0150053	0.0198509	0.0225885	0.0133984	0.000581709	0.0107598
Sf3b4	0.163152	-0.169565	0.128514	0.0201017	0.593679	0.0202232	0.0176229	0.0716738	0.00674014
Bola1	0.00462023	-0.0220708	-0.00956281	-0.00277618	-0.0036438	-0.00416614	-0.00319252	-0.0193372	-0.00407941
Hist2h2be	-0.0223081	0.0398199	-0.0244599	-0.00142774	-0.00376477	-0.00474874	-0.00700934	-0.0379279	-0.00317567
Hist2h3c2	0.0280962	-0.00228984	-0.00597809	0.00250548	-1.66743e-05	0.00491109	-0.000470827	-0.0292093	0.00136089
Hist2h2aa1	-0.0173372	0.0508378	-0.0135142	0.0033673	0.00242341	0.00345798	0.000237564	-0.0069299	0.0026363
Fcgr1	0.436619	-0.372615	0.185503	0.042061	0.0438781	0.0510311	0.0367115	-0.0152229	0.0226417
Hjv	-0.258915	0.330392	-0.177393	-0.0332168	-0.0378993	-0.0349428	-0.0364717	-0.16203	-0.021547
Txnip	0.279569	-0.201027	0.147346	0.0372537	0.0435313	0.0448152	0.0286847	-0.0552057	0.0250142
Polr3gl	0.000707182	0.024534	-0.0252918	-0.00189937	-0.00239333	0.00358952	-0.00077855	-0.0258325	0.00367145
Lix1l	0.224283	-0.169433	0.0209556	0.0216206	0.0316924	0.0328508	0.0185941	-0.0221611	0.0216787
Rbm8a	0.176239	-0.193932	0.187239	0.0230138	0.0227416	0.0326927	0.0264169	0.122599	0.00931036
Pex11b	0.0543477	-0.0256876	-0.00315308	0.00683559	0.00751185	0.00944032	0.00360068	-0.0136692	0.000897976
Pias3	0.114982	-0.0873828	0.019554	0.0129557	0.0121569	0.76101	0.00872043	-0.0256118	0.0137109
Polr3c	0.0642689	-0.0485042	0.0150357	0.00105147	0.00452187	0.011108	0.00610098	0.00602015	0.00682862
Rnf115	0.0799054	-0.142334	0.137767	0.00926319	0.00926194	0.0111221	0.0128523	0.225593	0.00217785
Gpr89	0.0665397	-0.0455754	0.0300621	0.0121108	0.0101758	0.00925033	0.00761686	-0.00980761	0.00453744
Gja5	0.0593987	-0.037378	0.0319342	0.00950611	0.0118958	0.00859489	0.00590584	-0.0133463	0.00727077
Acp6	-0.0239552	0.0508569	-0.0384434	-0.0025082	-0.00467471	-0.00732599	-0.00426803	-0.0299723	-0.00133415
Bcl9	0.0303959	-0.0207864	0.0250107	0.00763547	0.0103283	-0.000558834	0.00360585	0.00363884	0.00218909
Chd1l	0.00948594	-0.000192537	0.00803277	0.00116049	0.00612787	0.00248621	0.00464237	0.00452247	-0.00105244
Fmo5	-0.00595538	0.0280296	-0.0307224	-0.00123298	0.00173941	-0.00324673	-0.00306947	-0.0262203	8.54959e-05
Prkab2	0.101603	-0.127855	0.0635592	0.0121019	0.0133835	0.0116317	0.00847813	0.135195	0.00448509
Pde4dip	-0.276523	0.363317	-0.163018	-0.0286989	-0.0272049	-0.028107	-0.0261088	-0.0496902	-0.0124816
Sec22b	0.260847	-0.225444	0.101286	0.0345879	0.0283553	0.0362018	0.0252836	0.0201168	0.0210547
Notch2	0.195787	-0.175433	0.176767	0.027583	0.0286686	0.0332614	0.0244769	0.0208188	0.0172966
Hmgcs2	0.101695	-0.060436	-0.028716	0.00892125	0.0108082	0.008199	0.00691674	-0.0664401	0.0053196
Phgdh	0.237743	-0.224318	0.144203	0.0394004	0.0302702	0.0317161	0.0283467	0.0146431	0.0188317
Zfp697	0.0123702	-0.0618408	0.0519945	0.00451882	-0.00164745	-0.000836215	0.00235942	0.165626	-0.00396667
Wars2	0.0214155	-0.00156935	0.00620398	0.00773126	-0.00142416	0.00794798	0.00425635	-0.0109925	0.00220074
Wdr3	0.0739712	-0.0735618	0.0676384	0.0111345	0.0105699	0.00857127	0.0103759	0.0383976	0.00864456
Gdap2	0.0832248	-0.0662342	0.0567838	0.00793864	0.0105686	0.0203056	0.00844805	0.0116211	0.0100164
Man1a2	0.189541	-0.165384	0.0767509	0.0239032	0.0237408	0.02508	0.0248784	-0.00574101	0.0144212
Trim45	0.0316154	-0.0174545	0.000196204	0.00461299	0.00483664	0.00706499	0.000731212	-0.0120776	0.00424299
Ttf2	0.087194	-0.0659946	0.019098	0.00973152	0.014308	0.00791987	0.00619799	-0.0155944	0.0073538
Ptgfrn	0.263291	-0.185953	0.0207223	0.0284852	0.0367752	0.0417926	0.024177	-0.0490205	0.0252295
Igsf3	0.163109	-0.115057	0.00717096	0.0169478	0.0253442	0.0235274	0.0139492	-0.0369421	0.0155877
Atp1a1	-0.120608	0.188348	-0.0517184	-0.0183912	-0.0123889	-0.0161363	-0.0118446	-0.00366537	-0.007536
Slc22a15	0.0875626	-0.103929	0.132764	0.0155435	0.0117265	0.0191521	0.0139005	0.0342719	0.000591131
Casq2	-0.364443	0.461606	-0.25067	-0.0403061	-0.0421965	-0.0498551	-0.0434456	-0.152153	-0.0234069
Vangl1	0.0685706	-0.043315	0.0306203	0.00878369	0.0119949	0.0123675	0.00706587	0.0116272	0.00640065
Ngf	0.141756	-0.176259	0.198401	0.0303324	0.0172267	0.0245932	0.0228221	0.088484	0.00931363
Tspan2	0.0560095	-0.0480695	0.0331825	0.00526115	0.0014722	0.00947138	0.00673927	0.0132916	0.00433878
Sike1	0.0936507	-0.0768967	0.0408927	0.0140233	0.00981677	0.0184284	0.00950877	0.0285957	0.00738658
Csde1	0.0237606	-0.000427891	0.0711762	0.00334182	0.00270892	0.0025904	-0.000806459	-0.00290479	-0.0041958
Nras	0.239142	-0.275167	0.291324	0.0360479	0.0304948	0.0448617	0.032228	0.13761	0.0210203
Bcas2	0.141299	-0.0964673	0.0403022	0.0112886	0.0166994	0.0208522	0.0120137	-0.0270383	0.00782072
Trim33	0.083797	-0.0696651	0.0502953	0.0158901	0.0146093	0.0170297	0.0121192	0.00639887	0.00797303
Olfml3	0.551534	-0.409357	0.0133649	0.0602006	0.0720803	0.0661347	0.043427	-0.125078	0.0434882
Hipk1	0.129166	-0.121944	0.140613	0.0220582	0.0205288	0.0237628	0.0208585	0.0437415	0.00830021
Dclre1b	0.0397871	-0.0545806	0.0855299	0.0041874	0.00250144	0.00848891	0.00488509	0.0280317	0.00176548
Ap4b1	0.0445165	-0.027697	0.0107078	0.00170919	0.00236387	0.00979516	0.00253726	0.00814093	0.00200918
Rsbn1	0.0558711	-0.0508516	0.0815719	0.017007	0.0052173	0.0183414	0.00859396	0.00977497	0.00915742
Phtf1	0.164361	-0.13272	0.0439928	0.0203139	0.0223648	0.0166503	0.0152408	-0.00736477	0.0166026
Magi3	-0.0244196	0.0160755	0.00155087	-0.00182244	-0.00618959	-0.00149695	-0.00149409	0.03493	-0.00340499
Lrig2	0.0556879	-0.0406579	0.0286683	0.0125509	0.0129629	0.0129263	0.007443	-0.00991439	0.007728
Slc16a1	-0.228938	0.233896	-0.0682631	-0.027503	-0.0332106	-0.0300637	-0.0251023	-0.00756404	-0.020156
Ppm1j	-0.0167379	0.0269544	-0.0115953	0.00334988	-0.00177441	0.00290777	0.00152668	-0.00553566	0.000822799
Rhoc	0.471929	-0.442506	0.219457	0.0598093	0.062308	0.0716716	0.0481916	0.149066	0.0357852
Mov10	0.232085	-0.170239	0.0151132	0.0254801	0.0337079	0.0301732	0.020928	-0.0641489	0.013238
Capza1	0.326696	-0.302075	0.232151	0.0446175	0.0356658	0.0490992	0.038987	0.0664472	0.021675
St7l	0.0896189	-0.0813557	0.0704168	0.0146156	0.0110075	0.0176849	0.00835387	0.0288051	0.00563556
Cttnbp2nl	0.264514	-0.248992	0.127955	0.0270166	0.0279162	0.0359028	0.0231787	0.00489308	0.0164605
Kcnd3	-0.0185495	0.0218826	-0.0177161	0.00186311	-0.00123122	-0.00226092	-0.00288922	-0.00450982	-0.00419056
Ddx20	0.0551215	-0.0638316	0.0759613	0.00965879	0.00866996	0.00846402	0.0049809	0.0392424	0.000623656
Inka2	-0.0456234	0.075136	-0.0210754	0.00275856	-0.00566661	-0.00140337	-0.00654334	-0.0198063	-0.000978439
Rap1a	0.189279	-0.173913	0.146156	0.0238139	0.0193439	0.0326951	0.0200999	0.0666583	0.0193263
Atp5f1	-0.424765	0.492294	-0.232717	-0.0708846	-0.0752474	-0.0730441	-0.0622339	-0.150336	-0.0451035
Wdr77	0.0687341	-0.0975628	0.113582	0.0121698	0.00794334	0.0143088	0.0116758	0.127133	0.00812569
Chil3	0.142412	-0.290054	0.619719	0.0296333	0.0125372	0.0306549	0.0352592	0.30061	0.00236736
Cept1	0.167595	-0.135928	0.0652066	0.020466	0.020934	0.0207819	0.0163976	0.00260447	0.0147076
Dram2	0.0615539	-0.0321826	0.00404842	0.39205	0.00112021	0.00910869	0.00310553	-0.0274562	0.00200886
Lrif1	0.0440523	-0.0514054	0.0509082	0.00288911	0.0012918	0.00528429	0.00704059	0.0188439	0.000525788
Cd53	0.395102	-0.411574	0.48966	0.051635	0.0400134	0.0511226	0.0490969	0.136949	0.0215852
Lamtor5	0.220773	-0.152079	0.040037	0.0294898	0.023794	0.0206622	0.0173022	-0.0456533	0.0163029
Rbm15	0.0548202	-0.0456803	0.0585125	0.00925299	0.0058031	0.0100244	0.00972406	0.0104294	0.00866944
Strip1	0.04656	-0.0570959	0.0347906	0.00321571	0.00266289	0.00426134	0.840413	0.0123014	-0.00276377
Ahcyl1	0.132341	-0.11104	0.0799709	0.0229159	0.0139646	0.0200855	0.0132674	0.0228799	0.014455
Csf1	0.21944	-0.220165	0.261797	0.0329923	0.0345506	0.0368749	0.0378122	0.0983759	0.0166924
Gstm5	0.049657	0.000857869	-0.0610703	0.000163951	0.00501605	0.00056868	-0.000391608	-0.0509117	0.00728739
Gstm7	-0.131519	0.167601	-0.0583351	-0.0173656	-0.0161934	-0.0161176	-0.0156927	-0.0554638	-0.011151
Gstm2	0.0753785	-0.00826892	-0.0524112	0.00208456	0.00392954	0.00711049	-1.40958e-05	-0.0794027	0.00521814
Gstm1	-0.17306	0.215551	-0.104652	-0.0257797	-0.0266923	-0.0263939	-0.024422	-0.053672	-0.0148286
Gstm4	0.0565033	-0.027272	-0.0173059	0.00498149	0.0047029	0.00484859	0.00275965	-0.0329916	0.00252134
Ampd2	0.17453	-0.158911	0.095396	0.0248203	0.0213949	0.0234549	0.0201763	0.0281096	0.0115745
Gnai3	0.312755	-0.306468	0.25037	0.0416517	0.0366948	0.0434236	0.0386066	0.0611966	0.0240911
Amigo1	-0.0017851	0.00650439	0.00298082	-0.00157256	-0.00162873	-0.00119915	-0.00157684	0.00862442	0.00697448
Cyb561d1	0.0306282	-0.0216737	0.0398901	0.00266657	0.00527967	0.0051036	0.00121129	0.0033725	0.00341966
Psma5	0.246292	-0.278743	0.151895	0.0207285	0.023706	0.0261676	0.0230613	0.151281	0.0115156
Sort1	0.107422	-0.0703285	0.0213326	0.0100646	0.0165349	0.0137032	0.00812114	-0.0351729	0.00843454
Psrc1	0.162786	-0.1241	0.00114579	0.0125499	0.0219175	0.016638	0.0123895	-0.0392484	0.0164037
Sars	0.106084	-0.123449	0.189049	0.0251779	0.0138137	0.0246156	0.0208529	0.119081	0.00887731
Tmem167b	0.102785	-0.0681121	0.0433784	0.0189081	0.0128396	0.0200399	0.0114977	-0.00793099	0.009892
Taf13	0.0946994	-0.096313	0.0633286	0.0111577	0.0105391	0.010504	0.00903608	0.0431098	0.00656656
Wdr47	0.0244838	-0.0177884	-0.00620858	0.000949521	0.00373631	0.00415756	-0.000182479	0.000891236	0.00226929
Clcc1	0.0448626	-0.0128774	-0.00816031	0.00684011	0.00652688	0.00475547	0.00275715	-0.0218025	0.00763895
Gpsm2	0.196356	-0.157223	0.0260284	0.0220421	0.0266595	0.0243853	0.0145423	-0.0415562	0.0111556
Stxbp3	0.128676	-0.105589	0.0403757	0.0138827	0.0158493	0.0187491	0.00860304	-0.00420665	0.00541642
Prpf38b	0.138826	-0.134452	0.136678	0.0234472	0.016827	0.0250407	0.0180579	0.0215404	0.00950788
Fam102b	0.185155	-0.13588	0.0308571	0.0233003	0.0255901	0.0201732	0.0171202	-0.0389462	0.016844
Slc25a24	0.169664	-0.166125	0.145655	0.0225116	0.0251795	0.0286317	0.0256997	0.0421482	0.0139757
Vav3	0.121647	-0.106875	0.0876071	0.0181668	0.0189707	0.0182765	0.0113496	-0.0143026	0.0136957
Prmt6	0.0569398	-0.0545573	0.0569626	0.0106489	0.0126244	0.00744772	0.0063799	0.0348624	0.00699756
Amy1	-0.020403	0.0123501	-0.0196284	-0.00408327	-0.00950034	-0.00588795	0.00019901	-0.000378774	-0.00468468
Rnpc3	0.0719122	-0.0602298	0.0537146	0.012287	0.011238	0.00991897	0.00957311	0.0059515	0.00193748
Col11a1	0.3951	-0.296879	-0.000294026	0.0485337	0.047319	0.0525857	0.0286123	-0.0967192	0.0318438
S1pr1	0.0496366	-0.0646669	0.096975	0.0102717	0.0063171	0.0143265	0.00877091	0.079714	0.00326636
A930005H10Rik	0.032624	-0.0190758	-0.0232314	-0.00179344	0.00255011	6.3501e-05	-0.00248113	-0.014181	0.00419392
Dph5	0.0365264	-0.0896987	0.118997	0.00260489	0.00059757	0.00304098	0.0122741	0.145015	-0.00264547
Slc30a7	0.204419	-0.168511	0.0712327	0.0249373	0.0259803	0.03062	0.0169884	0.00177588	0.0168306
Extl2	0.0521332	-0.0313818	-0.00139243	0.0076712	0.00620991	0.00658633	0.00464013	-0.016728	0.00399577
Vcam1	0.356628	-0.283579	0.0653062	0.0434071	0.044222	0.0451603	0.0303503	-0.0219131	0.033714
Cdc14a	0.0513931	-0.0329867	0.00522445	0.00266524	0.0118834	0.0037051	0.0047489	-0.012413	0.00272621
Rtca	0.0958608	-0.0722696	0.0385209	0.00913216	0.00996821	0.0117986	0.00987442	0.00487258	0.00958666
Dbt	-0.116435	0.110328	-0.0320218	-0.0163477	-0.0193022	-0.0167147	-0.0137205	-0.0193214	-0.0133375
Lrrc39	-0.153205	0.159335	-0.0991824	-0.0295963	-0.0244527	-0.0307758	-0.0218818	-0.0471429	-0.0161936
Trmt13	0.05242	-0.0485999	0.0330162	0.00244303	0.0107081	0.0110357	0.00371066	0.00672458	0.00544048
Mfsd14a	0.0484234	-0.0666454	0.0562518	0.00425106	0.00428424	0.00395812	0.877533	0.0301715	0.000935042
Slc35a3	0.089011	-0.0818768	0.056074	0.010359	0.0106103	0.0195308	0.0174965	0.0262644	0.00916928
Agl	-0.142552	0.181798	-0.0616841	-0.0135947	-0.0254953	-0.0168091	-0.0170736	-0.0720658	-0.00723607
Frrs1	0.134689	-0.128068	0.144109	0.0289106	0.0131494	0.0222162	0.0221985	0.0218592	0.0112476
Palmd	-0.0569768	0.0490318	-0.0310226	-0.0141362	-0.00849748	-0.0133713	-0.0108332	0.0107058	-0.00506729
Snx7	0.240362	-0.199819	0.0442233	0.0234322	0.0315547	0.0308146	0.0222733	-0.00265461	0.0145586
Dpyd	-0.0292801	0.036735	-0.01895	-0.00523313	-0.00420244	-0.00300851	-0.00420371	-0.0260347	-0.00199063
Ptbp2	0.012822	-0.0242887	0.0479654	0.00578097	0.00208791	0.00738665	0.0043593	0.0518811	-0.00176414
Alg14	0.146482	-0.1058	0.0226055	0.0133398	0.0219097	0.0227879	0.0117862	-0.017617	0.0102893
Cnn3	0.44485	-0.349135	0.0952862	0.0496395	0.0601715	0.0717167	0.0455323	-0.0418195	0.0335163
F3	-0.00144053	0.0102367	0.0188616	0.00198761	-0.000623279	0.0014841	0.0054761	0.00996745	0.00350977
[truncated: 9,339 more rows]

## Sheet: Table S6
SlideID	Sham_1	Sham_2	day1_border_1	day1_border_2	day1_remote_1	day1_remote_2	day7_border_1	day7_border_2	day7_remote_1	day7_remote_2
Number of Cells	49	37	170	58	154	83	91	61	91	39
Mean Processed Reads per Cell	6.01791e+06	5.40973e+06	5.61719e+06	7.71224e+06	5.77817e+06	6.90373e+06	1.05952e+07	5.63091e+06	5.74171e+06	6.01064e+06
Mean Aligned Reads per Cell	2.04787e+06	1.69501e+06	1.76973e+06	2.10457e+06	1.62525e+06	1.8912e+06	3.35341e+06	1.62208e+06	1.73387e+06	1.90909e+06
Mean Reads Uniquely Mapped to Exonic Regions	1.61741e+06	1.32245e+06	1.45678e+06	1.41716e+06	1.12426e+06	1.31946e+06	2.43108e+06	1.27165e+06	1.05287e+06	818866
Median Detected Genes per Cell	5929.71	5188.95	6603.58	2941.22	5828.56	5886.49	8529.33	7343.18	7885.02	7788.95
Median Percentage of Reads Mapped to Mitochondria Genome	55.7832	68.5925	66.4595	96.6398	91.3117	91.7997	64.505	80.7692	78.2354	69.573
